# Supplementary material for: Virome characterization of field-collected rodents in suburban Beijing reveals a spectrum of emerging pathogens
Source: Research Square preprint supplement (doi:10.21203/rs.3.rs-3901407/v1), 2024-02-02
Supplement: Supplementary file 1 [file 1604479582ba41464b44dc56.xlsx]

## Sheet: Sheet1
Supplementary Table 4. Summary of the viruses detected in this study.
Virus name	Nucleotide sequence length	Full-RdRp sequence	Full-genome sequence	Novel virus	Best-hit accession length (aa)	Protein identity (%)	RdRp length (aa)	Best-hit accession	Best-hit	Genus	Families	Order	Phylum	Type	GenBank.accession	Nucleotide sequence
Allocricetulus eversmanni hepe-like virus	7187	TRUE	TRUE	TRUE	1695	74.8	1707	ATY47660.1	Hepevirus sp.	Hepevirus	Hepeviridae	Hepelivirales	Kitrinoviricota	RNA	PP211335	GGTCCCATCCTATTCAACGGGTGGTCCAGGTAACACACCCCAGCTATTGCGGGGTGGTGGGCATGGAGGCCCACCAGTTCCTTAGCTGTACGGGTGTGAAGACTGCGCTTGAGTCAGCAGCTACTGCCGCTGCAGCTGCGGCGTTTGTGAATGCTCACGCCGTCCCGGCGTATGTCTCCCCACAGCAGGCTAAGCTATTAGTTGATCTTTTCCAACCTGTTCAACTTAAGTTTGAGCCTCGTGTTACCTGGTCCCATCCTATTCAACGGGTGGTCCACAATTTTCTAGAGTCCTATGTGAGGCGAAAGGCCGGGAGGTGCCTTGAGGTAGGCGCACACCCCCGCTCTATCAATGAGAACCCTGAAGTCCTCCATAGGTGCTTTTTACGCCCTGTCGGGC…
Allocricetulus eversmanni hepe-like virus	7156	TRUE	TRUE	TRUE	1695	74.8	1707	ATY47660.1	Hepevirus sp.	Hepevirus	Hepeviridae	Hepelivirales	Kitrinoviricota	RNA	PP211336	GCTTGAGTCAGCAGCTACTGCCGCTGCAGCTATTGCGGGGTGGTGGGCATGGAGGCCCACCAGTTCCTTAGCTGTACGGGTGTGAAGACTGCGCTTGAGTCAGCAGCTACTGCCGCTGCAGCTGCGGCGTTTGTGAATGCTCACGCCGTCCCGGCGTATGTCTCCCCACAGCAGGCTAAGCTATTAGTTGATCTTTTCCAACCTGTTCAACTTAAGTTTGAGCCTCGTGTTACCTGGTCCCATCCTATTCAACGGGTGGTCCACAATTTTCTAGAGTCCTATGTGAGGCGAAAGGCCGGGAGGTGCCTTGAGGTAGGCGCACACCCCCGCTCTATCAATGAGAACCCTGAAGTCCTCCATAGGTGCTTTTTACGCCCTGTCGGGCGAGACAAACAAAGG…
Allocricetulus eversmanni jeilongvirus	1667	FALSE	FALSE	FALSE	2173	99.7	377	QXU63477.1	Jeilongvirus sp.	jeilongvirus	Paramyxoviridae	Mononegavirales	Negarnaviricota	RNA	PP211199	CCGACTTGTGTTTTCCAGTGAAGTGATTGGTCAGAGGATATTAACATTAGCACCTGCTGAAGCGTATATGGTTAGCAAAAATAATCCCAATGAAATGAATCTGAGGCAAAACATAATTCCTTTGTTTAATGGAAAACCAGAGTCAACATGGATAGGAAATCCTTCAGCTTTTATGTATATAAACAATTATATTAAGCCTCATTCCATAAGCTTTGTTCATAATGATATGGAATCATCATTTGAAAAAGATGCCTACACAATAGCATGTGAACAGTGCCACTCACTAGCCTTAGCTCTAAATTTGGGAACTCATGAAAGTATGTATATAACGAAGTTAGCTCCAAGACAAGCTGATTATACTTATCACTTGTTGAATTTACTACAATCTTATTATGAGGA…
Apodemus agrarius nodavirus	2961	TRUE	FALSE	TRUE	1032	54.4	905	WAX26160.1	Army ant associated Nodavirus 1	unclassified	Nodaviridae	Nodamuvirales	Kitrinoviricota	RNA	PP211337	AGTCGTCTGTCAAGCAAGAGCTGACTATTAGTACGAAATCGCTCGTCATAGTTGGTTTTGGCGTTGTCGGAGGTGTGTGCTTAGCACATCACTTTCGCCATGGCAGACTCGCAGGAGTGGTGGCAATCGGGCCATACCCTGCGGTAACATCAAACCCCCTCAGTAGGTGGCTACAAAGGACCATCTTGAGGGAAACGCGCGAGACCATAAAACAGGAGTGGCATCCTGATGATTTTATTCAGGACATAAGACCACATCGCGCGCAGGACAATGGACATGCAGTCAGCGGAGCCATACGTGATTCGTCAAGAAGAGCGATCATGGCGGCTATCCATGCGAAGGGGTGGAACAAATTGGAAATAAGCCCTAATCAAAGCACTGGCGCTGGCGTGGCCGATC…
Apodemus agrarius picobirna-like virus	432	FALSE	FALSE	TRUE	334	75.7	144	UZG89702.1	nabpantry virus 10	unclassified	Picobirnaviridae	Durnavirales	Pisuviricota	RNA	PP211200	GATTTTTCCAAGTTTGACCAGCACTTTAACGTTCAACTGCAGGATGCTGCAAGAGAAGTGTTAGCGAATATCCTGCGTGCTAACAAGAGTTCATTAGACTGGTTAACAAACGTGTTCCCAATAAAGTATATGATACCACTAATGTATGGAATTGGCGGTATCAGAATAGGCAAACATGGTATGGCCTCAGGATCAGGGGGAACTAACGCGGATGAAACTATTGCTCATAGAGCATTACAGTATGAAGTCGCACAAAGATCAGGTGCATATTTAAACCCTCATTCAATGTGTCTTGGCGATGATGGGATCCTGACTTATCCCGGAATAACAGTGGATGATGTAGTTGCGGAGTACAGTAGCCATGGTTTGGAAATGAACGTTGACAAACAGTACGCCTCA…
Apodemus agrarius picobirnavirus 1	603	FALSE	FALSE	TRUE	514	66.1	171	AVX53289.1	Marmot picobirnavirus	Picobirnavirus	Picobirnaviridae	Durnavirales	Pisuviricota	RNA	PP211201	GGCGTGTAATGTGCCAGTCACACAAATTAAAGTGGGATTAGATCATTACCTGCTTTCGGCGAGTAGAAATCGTAAAGGAGGTGACGGGAAATGAAGAAAGTACGTGTTACACGCGAAATGGCGGATGTTATTCGTGGGAACAATGGCCTTAGCCTGTATCTCGAAAATCTTCAGACCGGCAGGCAGATGACGCCACATTCGTGGTTATACGAACACGAAGATGCTGAACGTACCTTAAAGCGCTGGATTCCCTTAATGAAGAAGGGGAACGCGAAGTCACCTTACGGAAACGAGTTCAACATGTTTGACTTGGCCCAAGTCAAGAAGTTTGGTCCGCAGGGAGGCGTACCGCCGTTCGATTCGAAAGAAGTGGCCGATGTAATTGACCCGCTGTATTCT…
Apodemus agrarius picobirnavirus 2	499	FALSE	FALSE	TRUE	515	75.5	163	UAW00431.1	Porcine picobirnavirus	Picobirnavirus	Picobirnaviridae	Durnavirales	Pisuviricota	RNA	PP211202	GACGGGGCAAGGCATTGGCGACGATTTTTACTGGCTATCCGAAATGGATGCTGAAGAGTTGGTCGAGTACTTAGGGCAGTTCGGACTGCCAGCTAACGCCGAAAAACAGTCGATTGCAGATGAGTCACTCACGTTTCTGCAACGCATGAATCATCAGTCGTTCTTTAGTAGAGACGACGGCAGGGTCTTAGGGGCATACTATCCCACGATACGAGCCTTAGGGTCAATGTTATTACCGGAGAAATTTCATAAACCTGAAGACTGGAACTCCGACATGTTTTGTATCCGCAACTACACCATTCTCGAGAATACAATAGATAATCCCTGCTTCGATGAGTTCGCAACTTTCGTGGCACGTGGGCATAAGGATATGATCCCTTTTGCCAAATTACAAGCTTC…
Apodemus agrarius picobirnavirus 3	520	FALSE	FALSE	FALSE	49	95.7	47	UJT31894.1	Picobirnavirus sp.	Picobirnavirus	Picobirnaviridae	Durnavirales	Pisuviricota	RNA	PP211203	GTCTTAGGAAGACAACGATTGTGGTCTGATAAGGTCGCCATGCCTCTCAGTACGTCAGCAGTTAACCTAGATACAACTCCTTGGCTCACAGAACGACATGGCTACGATCCGACTTTGTGGATCGGAGTGAAAGGCTAATCAAGCTCGGAGATAGCTGGTTCTCCTCGAAAGCTATTTAGGTAGCGCCTCATGTATCACTCCAGGGGGTAGAGCACTGTTTCGGCTAGGGGGTCATCCCGACTTACCAAACCGATGCAAACTCCGAATACCTGGAAGTGCCGAGCATGGGAGACACACGGCGGGTGCTAACGTCCGTCGTGAAAAGGGAAACAACCCAGACCGTCAGCTAAGGTCCCAAAGTTATGGTTAAGTGGGAAACGATGTGGGAAGGCTTAGACA…
Apodemus agrarius picobirnavirus 3	599	FALSE	FALSE	FALSE	49	100	47	UJT31894.1	Picobirnavirus sp.	Picobirnavirus	Picobirnaviridae	Durnavirales	Pisuviricota	RNA	PP211204	CGTACTGAGAGGCATGGCGACCTTATCAGTAGAGGTCTTTTGTCTTCCTAAGACCGCTTGGCCTCCGACTTGGCGTAGCGAAAGCGAGTCTTAATAGGGCGTTTAGTCGCTGGGTATAGACCCGAAACCGGGCGATCTATCCATGGGCAGGTTGAAGGTTAGGTAACACTGACTGGAGGACCGAACCGACTACCGTTGAAAAGTTAGCGGATGACCTGTGGATCGGAGTGAAAGGCTAATCAAGCTCGGAGATAGCTGGTTCTCCTCGAAAGCTATTTAGGTAGCGCCTCATGTATCACTGTAGGGGGTAGAGCACTGTTTCGGCTAGGGGGTCATCCCGACTTACCAAACCGATGCAAACTCCGAATACCTACAAGTGCCGAGCATGGGAGACACACG…
Apodemus agrarius reo-like virus	384	FALSE	FALSE	TRUE	1298	79.8	124	QNS17459.1	Serbia reo-like virus 2	unclassified	Unclassified Reovirales	Unclassified Reovirales	Duplornaviricota	RNA	PP211205	TGGAGCTTGAACCGAGAGACATCACGCACGCACTACTGGCCAGCTATTTGCCATCAATCCAGACGATCGCTGGCTATGGGAGGGCATGGGTAAAAAACAAATCTGACGATCCGGAGAAAATTTTGAATGAATCATCTGATAATTACGTTTCGAGGTTACGTGAAAAAACGCGAGATAACCTATTAAGGCTTTATACTGAAGCGGAGACGCGTGGCTATACCATCGTGAAACCTGAAGAAATGTATACGTCACTTCTGAGAATGGCGAAGAACACATCATCTGGAATGTCAGTGGAGGTGGATATAAAGCGTGTTTACGGACCGCGTGTGGGGAAGAAAATCATTTATGACACCGTCAAGTCGAGACAGAAAGCGCTGGTAGCTC
Apodemus agrarius reo-like virus	515	FALSE	FALSE	TRUE	1298	77.1	170	QNS17459.1	Serbia reo-like virus 2	unclassified	Unclassified Reovirales	Unclassified Reovirales	Duplornaviricota	RNA	PP211206	TGCGGGACGAGGAAGGGAGATTACAGGTCTGTATTCGAAACTTTTCCATCTAGAGATTGCTGAAGAGAAGGCGATGGTTAGGAAGCCTCATCCAGATATTAATCTTTCACGTGCTTTCCTGGAACAGAAGACGATTATTGGAAATAGGACGATGTCGAGACAGAGGATGTCTTATGTTGATCGGATTGACAGTATACTGCGCGGCGATGTCGTAATGAGAGGCTTTATTACGTCGAATCACATTATGAACATGCTGGAAGAATTGGGGACGAACCACACACTTGAAGACATGACGACGATTTTCCAGTTGATGAACATCACAGCTCGTGTTTCAGAACGACTCGCACGCTACGTGTGCTCCGAGCGAGCAACCTTTGATACGCTGATGCTTTCGAAAGG…
Apodemus draco aparavirus	7382	TRUE	TRUE	TRUE	1455	58.3	1490	ULF99825.1	Aparavirus sp.	Aparavirus	Dicistroviridae	Picornavirales	Pisuviricota	RNA	PP211338	AATTTAACTAACTTTGCTATGGATTGCGGATATGACTGGTCGTATTTTAGCAAGCTTTTCCCTTCTGGAATTGAAGCACAAATACAAATTGATTTGAATGATGTAGGAGAAGTTCTTGCCAAATCAAAACTAGTCGCATCTGGTTTAATAGTAGCACTATTTTCCATTGGATATAAAATAACTGGAGAATACTTTGATGTTGCAAAAGCAATTTCTTTCCTAGGCCAACTAGGGAAAAACTTGACAGGAATAAAACAACTTAAAAATGTACTTATGGAAACATCAGAAGCTGTTATGAAGTGGTTCCGTGGAGATGTCTTAGGATTAGAAGATGCCACTGAGCTGGAACAAGTAATAGCTAATATTAAAGAATGGTTCGATGAAGTACGAGAATTGTTG…
Apodemus draco qinvirus 1	5536	TRUE	FALSE	TRUE	1797	26.8	1221	YP_009330273.1	Beihai sesarmid crab virus 4	Yingvirus	Qinviridae	Muvirales	Negarnaviricota	RNA	PP211339	GGCAAGACATCTGCGCCTGCCCTAGCGCAGAAGCCTATTTGACCGATTATGTGACCCATCGGTCGGGCCCCTGGTTGTAATGCCGGTAACCGTTAGGTTAGAGGTGATGGTGCGGCTGATTGCCTGTATGAGTGAACATACCTTCGTTAATGTAGCGGCGGATAATGAGTTTGTTTTCTGTTTTTTAGGTCAAATGGCTCACGTGTTCGCAATCCCGACGTATAGAAATTCCGTTGCCAATCAAGTGGCAAAACACCTTATCCAGTATGGTGCACTGGAAGAGAAAGATATGAGTGCCATTATGCATCAATCTGGTGTATTCAGGTCACAGTACACTGCAGAAGTATGTGAAGAGCTTTCAATTGAGATGCAGGAATGTCACCGTATAACTGAAACGGA…
Apodemus draco qinvirus 1	5586	TRUE	FALSE	TRUE	1797	26.8	1221	YP_009330273.1	Beihai sesarmid crab virus 4	Yingvirus	Qinviridae	Muvirales	Negarnaviricota	RNA	PP211340	GGGCAAGACATCTGCGCCTGCCCTAGCGCAGAAGCCTATTTGACCGATTATGTGACCCATCGGTCGGGCCCCTGGTTGTAATGCCGGTAACCGTTAGGTTAGAGGTGATGGTGCGGCTGATTGCCTGTATGAGTGAACATACCTTCGTTAATGTAGCGGCGGATAATGAGTTTGTTTTCTGTTTTTTAGGTCAAATGGCTCACGTGTTCGCAATCCCGACGTATAGAAATTCCGTTGCCAATCAAGTGGCAAAACACCTTATCCAGTATGGTGCACTGGAAGAGAAAGATATGAGTGCCATTATGCATCAATCTGGTGTATTCAGGTCACAGTACACTGCAGAAGTATGTGAAGAGCTTTCAATTGAGATGCAGGAATGTCACCGTATAACTGAAACGG…
Apodemus draco qinvirus 2	711	FALSE	FALSE	TRUE	1815	25.1	235	YP_009337847.1	Hubei qinvirus-like virus 1	Yingvirus	Qinviridae	Muvirales	Negarnaviricota	RNA	PP211207	AGAAGCTCGGGATGGAGATCGATGAAACGAAAACGATTGTTTCTGCTCGGAAGTGTGTTTTCCTTAACCAGATGTTTCTTGATGGGAGTGAACTGTTAACACCCATGAAAACATTCTGTCGAATTGGTAAACCTGGGAAACGTGAAACCCGAGCAACGCCTGACATTATAGATGAACTTAAATCACAGTGTCTTTCTGCTGTTACAAAAGGAACTGACCCATGGTCAACTTATATCTATATGATTTTCCGGTGCATGACCTTGTATTTCCTCAAGGGTCGGGGGCTGAAGCATTCAAGGGCTCAGATGATTTTAAAGGCACTGTTACCGAATTCTGCTGGCGGCTTCGCCATCCCCTCTGTCGCATCAGCTCTAACCACTTGTATAGCTGACATTTTGA…
Apodemus draco qinvirus 3	2271	FALSE	FALSE	TRUE	1830	24.7	308	YP_009342465.1	Wuhan insect virus 15	Yingvirus	Qinviridae	Muvirales	Negarnaviricota	RNA	PP211208	TGTTTATGAGATCTGCCAGAGTCGATGCCAGCATACTTGAATATGTTGGGAAAACATTGCCTCACGTAGTTGCTCTTGAAGTTATCAACAAGTTTGAGAAAAATCTCACAATTACCAAAATTCTCTCTTACTCTGGACGCAGACGTGCATATAGACGGTTCTTTGCAGATGACAGGATATTTACAAAATACGCCATCCCAATGCCGAAAACAATAGCGTTCGATAGAACTGCCGAGTACTATGACTGTGCTATAGACATTAGACGGAGATTTCTCATTCCAAGTGGCATTGTCATATTCAATCTAACGCTTCCAGACCCGGGTGCTGCTATTGGACATACCCTGCGATCTGATGTGTCATATGTTGAGTACCGAAAGCCTGTTGGTGTAAGTGAAGACA…
Apodemus draco ribovirus 1	2896	TRUE	FALSE	TRUE	833	33.9	793	APG77163.1	Wenzhou shrimp virus 10	unclassified	Unclassified Riboviria	Unclassified Riboviria	Unclassified Riboviria	RNA	PP211341	CGTGAGAGAAGTATAACGCCATCATATGGCACCTTTTTATACTGATACTTGCGCAGAACCAGTTAACTATGTAGTTATTTATAAGTCATACATTGAGTAATCAAGTAATCCTTGTGTGATACACTGCTACATCCATGCAATCTATTTAGATTAGGAAGCTACAGGTGCAGCCCACTTGAAATTCCACCTTGTTGAGAACTGATTGATTCATCAGCCTCGTAAAAAGTGAAAAGAATTCAGAGAACAATAAGAAAAATTGAAACACTGAACTCTCTGGATCAGGACCGTCTCCACCCCTGTCATTCGACAAAGGAGATAAGGGTCCGTGAAACCCAGTTTCATGGATTCGCTCAGAATTGGATCCTTTTTTTGGAGACAACTCTAAACATGAAAACTACA…
Apodemus draco ribovirus 2	3051	FALSE	FALSE	TRUE	1368	59.3	986	AYP67577.1	Shelly beach virus	unclassified	Unclassified Riboviria	Unclassified Riboviria	Unclassified Riboviria	RNA	PP211209	GCGCCTTAATACAAACCGAAGAATATCAATTTAATGGAACATACAATGAAGAAATGGTGAAATGGAAGAATGACATTGACGAAATGTGTGAAACACTCTTTGAACTAAAGCCTATTCATACTAGTCAATTAACTCATTTTGATCGCTCTTTACTATTTGGATTTACAAATAGAGAACATGTTTTAGTACTTTTAAAGGAAGTTAAGCCTTGCGATTTCGTTGATGTGCTTTCAATTGAGAAGATTCGAAACCCTCCGAAATATAAGTTTGGAACATCGGATTTCGTAATTGATCCAAGAACTAATTATGTAAGTAAAACACCAATGCAGTATTTATCAAACGTGGATGCTTATCAATTGGTTCTCGATGCAAACGGATTGTTAAAAGGAGTGTCGAAAT…
Apodemus peninsulae coronavirus	29119	TRUE	FALSE	FALSE	7155	98	3807	QPN00060.1	Apodemus peninsulae coronavirus	Betacoronavirus	Coronaviridae	Nidovirales	Pisuviricota	RNA	PP211342	ATTTGAAAGTATTTTTGTCCAAGTTTCAGATCTTTGGCAAAAAGTTTGTTAAAAATGTTAAAAAGCTTGTAGAAGAGTGGATTAAAAAGTCTGTTTGTGCCCTTGCTTGGGTTGTCCTGCATGTCATAAACGGTGCTTATCTAATCCTAGAAGATGGTTTCCATTTTGTTGGAAGTGTGCCTGATTATGCTCGCAATTTTGTGAGGATACTCAGGGAAATGGTTAATATGGTGTTGGATTGTATGAAATACACCATAATTAAGGGTCTACCTTGTTTTAAGGTGGCTGCTGAGTATATTGTCTTCTCTGGAAGCTTTGCATATAAATTGGGTTTGGCTATGATAGATAATCTAGTTCTACCTAGTGATATGATACAGAGTGAGCTCCTTGCTTTGCATG…
Apodemus peninsulae hepevirus	4491	FALSE	FALSE	FALSE	1695	80.2	818	ATY47660.1	Hepevirus sp.	Unclassified	Hepeviridae	Hepelivirales	Kitrinoviricota	RNA	PP211210	ATCAGGACACCCTGTCTCGTGTTGGTACGGCGGCCTATCCATTGCTTGGCTCAGGCATCTACCAAGTTCCATTTTCGGTGTCTGTGGCTGCCTGGGAGAGGTTTCATCGTCCAGGTGATGAGCTATATTTGTTGGGCCCAGCTGCCGCTTGGTATAAGAGCCAGAATGTCCAACACGATCAAAGTATCATGTCAATCAGCAAAACTATGGTATCCTTGTGTGACCTCGCTTTTCAAGTGGAGCGAGGGGGTGCATTTGATAAGTTTTTACCATCTGATAAGGTTAAGGAGGGCAACTATCACTACCGGTATATTGCGGGTGTTCCTGGTTCTGGTAAGTCTACCGGTATTTCTAAAAATGACTGTGACATGGTGGTGGTGCCAACAAACACCCTACGTG…
Apodemus peninsulae jeilongvirus	936	FALSE	FALSE	FALSE	2173	81.3	268	QXU63477.1	Jeilongvirus sp.	jeilongvirus	Paramyxoviridae	Mononegavirales	Negarnaviricota	RNA	PP211211	TTAGCTCCCCGCCCTGCTGACTACACTTATCACCTGCTAAATCTAATGCAATCTTATTATGAGGAAGTTTATATATTTATTCCTATAACTAGCAACCCGTATTCAAGTGAGATATATCTCATATCCACACTTCCTCGGAATTCAACTTTGATTTATCCAGACCTGTTGATCAAACAAATAGATAAAACAGAGCCATCAAACATTTTTAATATAGGCAATACTATAGTTAACTTTAAATTGGGTAAACACATGGTCATGAAGGAACATCTTAAACTATATAGTGACTATACTAAATCAGCTTTGATGTCCCTTACAACAACAGAGAAAGTCCTAATTAGAATAGGCTTTCAACTAAATGGACCAAAGCTTATAAAACAGATTACCGGCCATGATACAGGC…
Apodemus peninsulae orbi-like virus	782	FALSE	FALSE	TRUE	1059	78.8	259	AZQ19973.1	Orbivirus sp.	Orbivirus	Sedoreoviridae	Reovirales	Duplornaviricota	RNA	PP211212	GGGGTATACGCGTGAAAAGAATCAGTGGGCAAAGATGATGAAACATTCGAGCTTCTTTAAAAGATCGCTGCTGGCGAATCAAAAGCGTGTTGAGGAATCGATTACCTATGCAAATGAGCTGTGCGATGTACCGTCCGACATGCCCATATTTAGGCACTTGCTAAAAAACACTTTCAGAATGGAGTTTGAACCGAGAGACATCACGCACGTACTACTGGCCAGCTATTTGCTATCAATCCAGACGATCGCTGGCTATGGGAGGGCATGGGTAAAAAACAAATCTGACGATCCGGAGAAAGTTTTGAATGAATCATCTGATAATTACGTTTCGAGGTTACGTGAAAAAACGCGAGATAACCTATTAAGGCTTTATACTGAAGCGGAGGCGCGTGGCTATAC…
Apodemus peninsulae orbi-like virus	780	FALSE	FALSE	TRUE	1059	79.2	259	AZQ19973.1	Orbivirus sp.	Orbivirus	Sedoreoviridae	Reovirales	Duplornaviricota	RNA	PP211213	GCGTGGCTATACCATCGTGAAACCTGAAGAAATGTATACGTCGCTTCTGAGAATGGCGAAGAACACATCATCTGGAATGTCAGTGGAAGTGGATATAAAGCGTGTTTACGGACCGCGTGTGGGGAAGAAAATCATTTATGACACCGTCAAGTCGAGACAGAAAGCGCTGGTAGTTTTTCTGCAGGGTGATAAGATTTACTCGCGTGAAAATATGACCAAAAAGTACGATAGCAGGGATTCATATCAGACGAAGGGCTCGCGTGATGTTCCGATAAAGGCAACGAGGACGGTTTACTCCATTCACATTGGAATTCTTGCGCCACAGTTGATAATGACACTTCCTCTAAATGAATACGTCTCGAAAGTGGGAGGTACAACAACGCGAGATATCCGGACGCT…
Apodemus peninsulae orbi-like virus	1340	FALSE	FALSE	TRUE	1059	78.3	446	AZQ19973.1	Orbivirus sp.	Orbivirus	Sedoreoviridae	Reovirales	Duplornaviricota	RNA	PP211214	GGCGAGATAATGATTGAACATGTCTCGAAGGCGTACCCTGGTGTATTCGAAGTGCTTTCCGAGCAGTACGTCGGAGATGACACGCTGATGTATCTGAGATTGCATACACGGGATGCGAAGACGTTTGATGGAGTTGTCGATAAGATAATGGAAGCGATCAAGCTATGCGGACATGAAGCCTCAGAGTCGAAGACGACCTTCCTGCCGGGATCATGCGAGAAAACACAGACGCACGCGAAGCAGGGTATATATATACCGCAAGATCGTATGATGATGATCTCATCCGAACGACGGAAAGATATAGAGGACGTGCAGGGATATATGAGGGCGCAGGTCTCCACATATGTCACAAAGGTTTCACGTGGCTTTTCTGAGGAATTGGCGCAGTTAATACTTCTT…
Apodemus peninsulae qinvirus	546	FALSE	FALSE	TRUE	1797	38.2	152	YP_009330273.1	Beihai sesarmid crab virus 4	Yingvirus	Qinviridae	Muvirales	Negarnaviricota	RNA	PP211215	TGGGACGACTGACACAATCTTCCATACACATTTAATATCCTGGTCCATAAGAAGGTTGAAGGATCGCGGAGTACTAAGAGATGATGAAATAGCTACAGTCTGTACGCTGATCGATGATGCTATTGTCTCACTGTCGATCTCCATAAAAAGATTACCAGAAGACATACTTGTCTTATGTGGTCTGTTCTATGCAGAAATGAAGGCATGTTATATGAAGATGGGCATGGAGATTGATGAGACAAAAACAATTGTGTCCACAAGAAAGTGTGTATTTTTAAACCAAATGTTTCTGGATGGAAGTGAGGTTCTGACGTCAATGAAAACATTCTGCAGGATTGGCAAACCTGGAAAGCGTGAGATTAGAGGTACTGTGGACAGGATCACTGAAGTGCACTCACA…
Apodemus peninsulae reo-like virus	1706	FALSE	FALSE	TRUE	1298	79.9	566	QNS17459.1	Serbia reo-like virus 2	unclassified	Unclassified Reovirales	Unclassified Reovirales	Duplornaviricota	RNA	PP211216	CGGCGCACAACGCCGGCATAGGCGAGATAATGATTGAACATGTCTCGAAGGCGTACCCTGGTGTATTCGAAGTGCTTTCCGAGCAGTACGTCGGAGATGACACGCTGATGTATCTGAGATTGCATACACGGGATGCGAAGACGTTTGATGGAGTTGTCGATAAGATAATGGAAGCGATCAAGCTATGCGGACATGAAGCTTCAGAGTCGAAGACGACCTTCCTGCCGGGATCATGCGAGAAAACACAGACGCACGCAAAGCAGGGTATATATATACCGCAAGATCGTATGATGATGATCTCGTCCGAACGACGGAAAGATATAGAGGACGTGCAGGGATATATGAGGGCGCAGGTCTCCACGTATGTCACAAAGGTTTCACGTGGCTTTTCTGAGGAAT…
Apodemus peninsulae ribovirus	1989	FALSE	FALSE	TRUE	565	79.6	565	AYU49213.1	Nai virus	unclassified	Unclassified Riboviria	Unclassified Riboviria	Unclassified Riboviria	RNA	PP211217	GGGGTATTCTACCATGGGCCTAAATGCGTGCTTGCAGGAGTAAACGTTTTTCTACTTATAGGTACAAAAACAATATCGATCCAGTTGACATTGTTAAGGAGGTCACTCTCTTAGGTTTTAGCATTCGTTATCGACACAAACAGGGTTTTGTAGCAACATACAGGCGTGGAGATCTCGTCTTTGAACGGGTACACGCTTGCCACTTTCGCTTGGCCCAGCTTTGCTATTCCCATTGGCAGTCTCAAATCGTTACTACCTACCAACAGCAGACCATTAAAAGCTTGAACATGACAACGCCTCTTACGAAGGCCCTTCAGGCCTCTCTTGAGGCTAAAGGTGTTGCCATGGTTCGTCTGACTGGCTTTAGGCACACGCGTCCCGGACCTGTTTCCAAACTTC…
Avian orthoavulavirus 1	376	FALSE	FALSE	FALSE	187	96.7	122	ACV13202.1	Avian orthoavulavirus 1	orthoavulavirus	Paramyxoviridae	Mononegavirales	Negarnaviricota	RNA	PP211218	CTGGTATTTGTCATGGGTTATCTAGGTGGGCCTACATTTGTACATGAGGTAGTGAGGATGGCAAAAACTTTAGTACAGCGACACGGCACACTTTTGTCTAAATCAGATGAGATCACACTGACTAGGTTATTTACCTCACAGCGGCAGCGTGTCACAGATATCTTGTCTAGCCCCTTACCGAGACTAATGAAATTCTTGAGAAAAAATATCGATACTGCGCTGATAGAAGCCGGGGGACAACCTGTCCGTCCATTCTGTGCAGAGAGCTTGGTGAGTACATTGGCGGACATAACTCAGATGACCCAGATCATCGCTAGTCACATTGACACAGTCATTAGATCTGTGATCTACATGGAGGCTGAGGGTGATCTCGCTG
Avian orthoavulavirus 1	417	FALSE	FALSE	FALSE	2182	99.3	139	UJT31940.1	Avian orthoavulavirus 1	orthoavulavirus	Paramyxoviridae	Mononegavirales	Negarnaviricota	RNA	PP211219	CATGCAATGCTGTTTAGAGACGATGTCTTTTCATCCAACAGGTCCAACCACCCTTTAGTCTCTTCTAGTATGTGTTCTCTGACGCTGGCAGACTATGCACGGAATAGAAGCTGGTCACCTTTGACGGGGGGTAGGAAGATACTAGGTGTATCTAATCCTGATACCATAGAACTCGTGGAGGGTGAGATCCTTAGCGTCAGTGGAGAGTGCACAAGGTGTGACAGCGGGGATGAGCAGTTCACTTGGTTCCATCTTCCGAGTAATATAGAGCTGACCGATGACACCAGCAAGAACCCTCCGATGAGAGTGCCGTATCTAGGGTCAAAAACTCAAGAGAGGAGGGCCGCCTCGCTTGCGAAAATAGCTCATATGTCACCACATGTAAAAGCTGCTCTAAGA…
Avian orthoavulavirus 1	347	FALSE	FALSE	FALSE	2180	97.4	114	UMH37639.1	Avian orthoavulavirus 1	orthoavulavirus	Paramyxoviridae	Mononegavirales	Negarnaviricota	RNA	PP211220	CGATCCGACTTTGGGGGACTGAGTAACCTTCAATACTCAAGGCTCTATACGAGAAACATCGGTGACCCGGGAACTACTGCTTTTGCAGAGGTCAAGCGACTAGAGGCAGTGGGGTTACTGAGTCCTAGCATTATGACTAACATCTTAACTAGGCCGCCTGGAAATGGAGATTGGGCCAGTCTATGCAACGACCCATACTCTTTCAATTTTGAGACTGTTGCAAGTCCAAATATTGTCCTTAAGAAACATACACAAAGAGTCTTATTTGAAACCTGTTCAAATCCCCTATTATCTGGAGTGCATACAGAAGATAACGAGGCAGAGGAGAAGGCATTGGCTGAATTTTT
Bastrovirus BAS-3	5918	TRUE	TRUE	FALSE	1223	81	1224	APQ43033.1	Bastrovirus/VietNam/Rat/16715_26	unclassified	Astroviridae	Stellavirales	Pisuviricota	RNA	PP211343	ACCATGGACCTCTCCTTCTCGGCCGCCAACCGCGGTCCGTGGGAAGCTCAACACACCGCATGCTACGGCGGTGCAGTGGCACGCAGAGTCCGCGACGCCCTGCACATTCCGTACGTGCTCAACAAGGTGGAGAAGGAACACCTGTTGAAAGTGCTCAAGTGCGACGTCGTGTTCGAGGATCGCATTGCACACACACACCCGGTGGTGCGGGGCTTGCATGCATTTGCAAACCACCACGCCTACCGCCACTGCGAAAACGCCATCGACATCGGTGGGGATTTCCGCAACATCAAGCGCCGCGCCGTGCATGTGTGCGGCCTGGTGGACAACGCCAGAGATGAGCTGCGCTTGCACAGGGCCATTGTGGACAACCGGCCCAATCTTGCCAGTTACTGCATC…
Bastrovirus BAS-3	5918	TRUE	TRUE	FALSE	1223	81.2	1225	APQ43033.1	Bastrovirus/VietNam/Rat/16715_26	unclassified	Astroviridae	Stellavirales	Pisuviricota	RNA	PP211344	CCATGGACCTCTCCTTCTCGGCCGCCAACCGCGGTCCGTGGGAAGCTCAACACACCGCATGCTACGGCGGTGCAGTGGCGCGCAGAGTCCGCGACGCCCTGCACATCCCGTACGTGCTCAACAAGGTGGAGAAGGAACACCTGTTGAAAGTGCTCAAGTGCGACGTCGTGTTCGAGGATCGCATTGCACACACACACCCGGTGGTGCGAGGTCTGCACGCCTTTGCAAACCATCACGCCTACCGCCACTGCGAGAACGCCATCGACATCGGTGGGGATTTTCGCAACATCAAGCGCCGCGCCGTACACGTATGCGGCCTGGTGGACAACGCCAGAGATGAGCTGCGCTTGCACAGGGCCATTGTGGACAATCGGCCCAACCTTGCCAGTTACTGCATTC…
Bastrovirus Rat/77	2415	FALSE	FALSE	FALSE	1222	83	687	QNJ99356.1	Bastrovirus Rat/77	unclassified	Astroviridae	Stellavirales	Pisuviricota	RNA	PP211221	CTGCACCATGATGACAGCCTTCAAGGCCGCCCAGGCATACAAGCGCGTGATTATGGACGAAATCACGCTCCATCACGCGGGCGCCGTGCAGTATCTGATTCGCACGCCCGGCCTGGAGAAAGTGTACGCCCTGGGGGACCTGCACCAGATTGATTTCACAGACTTCAGCAACACCGGCTTCCGGCCCCGCTTGCAAGACATCTACCGCCATTGGTCCATCACCACGCTGACAGAAACCCACCGCTGCCCGCAGGACGTGGTGGAACTGCTCAAGCCCATTTATGGCTGGACCGGGACGAGCAAGGTGGCCAAGTCCATGCTAAAGGGGGTTTGCAACCGTGCGGCCCAGCACCTGTGCTTCAGTCAGGCCACAAAGCAATTGCTGACGGCCCGGGGCCT…
Bastrovirus Rat/77	3986	TRUE	FALSE	FALSE	1222	96.6	1222	QNJ99356.1	Bastrovirus Rat/77	unclassified	Astroviridae	Stellavirales	Pisuviricota	RNA	PP211345	CATGGATCTCTCCTTCTCGGCCGCTCAGCGCGGCCCCTGGGAAGCTCAACACACCGCATGTTTCGGCGGTGCAGTGGCACGCAGAGTCCGCGATGCCCTGCACATTCCGTTCGTGCTCAACCGCGAGGAAAAAGAGTATCTCCTCAAGGTTCTGCGGTGCGACCTCGTGTTCGAGGATCGCATTGCACACACGCACTCCATGGTGCGCGCATTGCACGCCTTCGCCAACCACCTCGCCTACAGGCACTGCGAAGGCGCAATTGACATTGGTGGTGACTTCCGCAACATCAAGCGGAGGGCAGTTCACGTGTGCGGTCTCGTAGACAACGCGCGCGATGAGCTGCGACTGCAGAGGGCCATGGTTGATCAGCGCCCCAATCTGGCCGGCTACTGCATCAG…
Bastrovirus Rat/77	1712	FALSE	FALSE	FALSE	1222	96.6	442	QNJ99356.1	Bastrovirus Rat/77	unclassified	Astroviridae	Stellavirales	Pisuviricota	RNA	PP211222	GTGCACCGGCATTGAAAGGGTGACCAAGGAGAACTTCCCCGTAGCAGCCAACCGCACAACACTCTGCCTCACGGAGGGCTATTCTGAGTGCCAGACGGCCCGCGTTGGTTTCACAGATGTGGTGCAGGAGGCATGCCGGCAGTCGCGCCCGCAGGATAGGGGCGCGCAGGTGGCAGCCCTGCTGGACCGTGTGTGCGCTCGCAACAACAACGTCGGCGCACGGCTCGCACGCCAGAGAGCCACAGCCATGTTCACGGCCTTCCAGCAGTGGTGTGAAGATCAGCCGGCCATCCTAGAGCAAGAAGCCCCTCTGCGCACAGCCGAGTGCCTGCGCGCGGCGGCGGAGAAAGACCCAGAGCTCCGGCAGTACTTCAGGGAGCACAACCTCAGGGATCTGGT…
Bastrovirus Rat/77	5930	TRUE	TRUE	FALSE	1222	97.1	1222	QNJ99356.1	Bastrovirus Rat/77	unclassified	Astroviridae	Stellavirales	Pisuviricota	RNA	PP211346	CATGGATCTCTCCTTCTCGGCCGCCCAGCGCGGCCCTTGGGAAGCTCAACACACCGCATGCTTCGGCGGTGCAGTGGCACGCAGAGTCCGCGATGCCCTGCACATTCCGTTCGTGCTCAACCGCGAGGAAAAAGAGTATCTCCTCAAGGTTTTGCGGTGCGACCTCGTGTTCGAGGATCGCATTGCACATACACATTCCATGGTGCGCGCATTGCACGCCTTTGCTAACCACCACGCCTACAGGCACTGCGAGGGCGCAATTGACATTGGTGGTGACTTCCGCAACATCAAGCGGAGAGCAGTGCACGTGTGCGGTCTTGTAGACAACGCGCGCGATGAGCTGCGACTGCAGCGAGCCATGGTCGATCAGCGCCCCAACCTGGCCGGCTACTGCATCAG…
Bastrovirus Rat/77	4879	FALSE	FALSE	FALSE	1222	98.1	977	QNJ99356.1	Bastrovirus Rat/77	unclassified	Astroviridae	Stellavirales	Pisuviricota	RNA	PP211223	GCGGCGCTACACGCTGTTCCGTTGCGTGCATCCTTTCAGGCAGATCACCCTGCGTCACCCAGTGGACCGCAACACAGTCCATGTCCCAACACCGGCAGGACATGTTATCTCCTGCCCTCGCAACGTGTGGCAGAACCTGCTAAGCTGGGCGTGCAGTCGAGCCGACAACAAGTTCGACTTCAGCTCTCTGTTGGCATACGCCCGCGCCCTCCGCCAACGCCTAACCATTGGCGGACAAACCGTGCAGGAGGGCTGGTCACAGGATCCCAGGCAGGTTCATGAACTGTGCATCGCGTGCTTCGTCATGGCTGCAGCCATGCGTTACACGCGAACGCAAAACATCGCGGTTGCCTTCGCCGAGCTGCGGCGAGAACAGCAGCGGGGGGGTTTTGAACGCTG…
Bastrovirus Rat/78	5895	TRUE	TRUE	FALSE	1223	97.9	1223	QNJ99358.1	Bastrovirus Rat/78	unclassified	Astroviridae	Stellavirales	Pisuviricota	RNA	PP211347	CCATGGACCTCTCCTTCTCCGCCGCCCAACGCGGCCCATGGGAAGCACAACACACCGCATGCTTCGGCGGTGCAGTGGCCCGCAGAGTCCGCGATGCCCTGCACATTCCGTACGTGCTAAACCGCGAGGAGAAAGAACACATCCTCAAGGTTCTGCGTTGCGACATCGTCTTCGAGGATCGCATCGCACACACGCACCCAGTGGTGCGTGCCCTCCATGCGTTCGCCAATCACCACGCTTACCGGCACTGTGACGGGGCGATCGACATCGGGGGAGATTTCCGCAACATCAAGCGGAGACCAGTCCACGTTTGCGGCCTCGTGGACAACGCCAGAGATGAGTTGCGGCTACAACGGGCGATAGTTGACAACCGCCCCAACCTGGCCGGCTACTGCATCA…
Bastrovirus Rat/78	5849	TRUE	TRUE	FALSE	1223	97.7	1208	QNJ99358.1	Bastrovirus Rat/78	unclassified	Astroviridae	Stellavirales	Pisuviricota	RNA	PP211348	CAACACACCGCATGCTTCGGCGGTGCAGTGGCCCGCAGAGTCCGCGATGCCCTGCACATTCCGTACGTGCTAAACCGCGAGGAGAAAGAGCACATCCTCAAGGTGCTGCGTTGCGACGTCGTCTTCGAGGATCGCATCGCACACACGCACCCAGTCGTGCGTGCCCTCCATGCGTTCGCCAACCACCACGCCTACCGGCACTGTGACGGAGCGATTGACATCGGGGGGGATTTCCGCAACATTAAGCGGAGACCAGTCCACGTTTGTGGTCTCGTGGACAACGCCAGAGATGAGCTGCGGCTGCAACGGGCGATAGTTGACACCCGCCCCAACATGGCCGGCTACTGCATCAACGGCGTGGAGAATTGCCACGAGCGCGCTGACAAAGGCATCAGCGTG…
Bastrovirus Rat/78	3767	TRUE	FALSE	FALSE	1223	96.7	1223	QNJ99358.1	Bastrovirus Rat/78	unclassified	Astroviridae	Stellavirales	Pisuviricota	RNA	PP211349	CATGGACCTCTCCTTCTCCGCCGCCCAGCGCGGCCCATGGGAAGCACAACACACCGCATGTTTCGGCGGTGCAGTGGCCCGCAGAGTCCGCGACGCCCTGCACATTCCGTACGTGCTAAACCGAGAGGAAAAGGAGCACATCCTCAAGGTTCTGCGGTGCGACATCGTATTCGAGGATCGCATCGCACACACGCACCCAGTCGTGCGTGCCCTCCACGCGTTCGCCAACCACCACGCCTATCGGCATTGCGAAGGTGCGATCGACGTCGGAGGTGACTTCCGCAACATCAAGCGGAGGCCTGTCCACGTTTGTGGACTTGTGGACAACGCCAGAGACGAGCTGCGGCTGCACCGGGCCATTGTTGACACCCGCCCCAGCCTGGCCGGCTACTGCGTCAA…
Beiji nairovirus	316	FALSE	FALSE	FALSE	431	99	105	QNU41074.1	Beiji nairovirus	Orthonairovirus	Nairoviridae	Bunyavirales	Negarnaviricota	RNA	PP211224	GTAGGTGGTCAGCAGTCCATGTACAACAGTGTGCCCCACCTGACCAATTTTGCCTTTACAATTTTCAGACAACAGATCTATTTCAATTTCATTGAGAATTTCATAAGAAAGTATGGGAAGATAATACTGACAAGCATAAGCAGCTTTGGTAGACTATACATTCCTGTTTATTCTAATATGATTGAAGCTGGCTTAGTAGTTGAAGATCTTGAGCAAGTGGTGTCCAGCCTCAGTAGGCTCTCAGAATTTACCAGATATTTACCTTTGGCAGAGTATGATGTAGTGCTTCCGGGTGGGGAGAAGTCAATAGTGGAAC
Beiji nairovirus	732	FALSE	FALSE	FALSE	866	99.6	243	QTZ96789.1	Beiji nairovirus	Orthonairovirus	Nairoviridae	Bunyavirales	Negarnaviricota	RNA	PP211225	GAACAGACTTGTTTATATTGGTGGATTTGCAAAAAAAGAGAAAACCATAAAAGAAGTTACACAGGATCTAGAAGAACTCCTATGCTGCATTGAAACCATTGACCCAAAAGTAAAGGAAGAGATAAAAAAGAGTGTTGTCGAAGCACGATCTTTAAGACAAGTCACTTGGCAATATGCTAGCAAACTACCTCTGGATCAGACACTAATGACCATAGAGGGTCACAACATATTTTACTGGTTAAAAAGTCTGCAGAAGTCAATGGCCAAGCTATGGAATCTTGAGCCACTGGCTGAGATTGTTAATCATCCCACAATCTTAAATGTTGTGGAAACAATCAAGAATCTCAGTCAGGGACAACCACCAGTTGTGACAATTAAGTATCTTGAAACCGTCCACAA…
Beiji nairovirus	655	FALSE	FALSE	FALSE	866	98.6	218	QTZ96789.1	Beiji nairovirus	Orthonairovirus	Nairoviridae	Bunyavirales	Negarnaviricota	RNA	PP211226	GCCCTTGATATATTTATTGGGGCTCTAGAGTTAGAGACGGAAGAAATGAGCAAACCTCTTATAGACTTGAAGGATGACTTCCAGCAGCTCTTTAGCTCATACCAAGAACTTATAAGTTTAAAAAGAGAGAATCCTGACTTAACATTTAAGAAACAAGAAAGAAGGCTGAGAAAGTTGGAGGAAGACTTATTTAAGAACCATAATAAGGCTATTGCATTTTACTGTAATATCCTCTTTATTGCATGCTTTGCATGTCCTTGGTTCAGAAGCTTAAAGCACCAGGAGGGCTTGATGCTGAAGGCAATCTTTAGTGAAATTGGTCTGTCGTTTAACACTGAGAAACTAAGCACAAAGTACATGTCTGCATTACTCCCTTTGCTGTGCACCAGACAACTTGTG…
Beiji nairovirus	1628	FALSE	FALSE	FALSE	4811	97.2	542	UXX19125.1	Beiji nairovirus	Orthonairovirus	Nairoviridae	Bunyavirales	Negarnaviricota	RNA	PP211227	TCTATGGCCACTGATGCACTCTTTGAGGATGAGGATGATGGATACATTCCCCCAAAGTCAGTACAAATCTCCAGGAAGAAAATGAAGGCAGAGATAATCAGGTGGAAGATACAGGTTGAGAAGTACCTGGAGCAAGAAAGGAAGAAAAGGTTGAGGAAGAAGGAACTAAAGCAGGAATCAGAGAACCCAGAGTTCTACAAGGACTTCATACCCGTGACTGGGCGCCCTGTGTTGCCATCTGGTGTTCCCCTAGAACCCGAGGTTAGAGTAAGACCAAATGCAGCAGATAAGGAACACACCCCAAGCCCAAACAGGCCATACAGTTCAACACCATCCCAAGTGGCACAAGGCACATCCCAGGGCACACTACAAAGTGAGGATGCCTCAGGACTGGGTGTG…
Beiji nairovirus	2181	FALSE	FALSE	FALSE	4811	100	726	UXX19125.1	Beiji nairovirus	Orthonairovirus	Nairoviridae	Bunyavirales	Negarnaviricota	RNA	PP211228	TGACCTCTAGCTCAAGGTTTAATGTGACAAGCTTTTATGCTATTAGGCCAACAAACTCTCATGATGACACAAACATATCTGAGATATTGTCCTATGGTATACAAGAGGGTAAATATGTAAGTATCAAACAGCAAACTATTGACTATTCAACTTACTCAGAGAGGTACTTCATCATCATTGAAGCAATCAGTGTTATCAACCACTTACCCTATGAGGATGATGTAAAGTCTAGATTGATGCAGAATTTCTTGACCTGGGTTCCCACAACTGAAGGCATTATAAGTATACTGGATTGTGGGTTGAACGATTTCTACGATTCTCTGGTTGCACTGTTCGGCAACACTACTTTAGCAGACACACTAGACATGGAGCAATACTCTACACATAAGGCTGATGACA…
Beiji nairovirus	924	FALSE	FALSE	FALSE	4811	98.7	237	UXX19125.1	Beiji nairovirus	Orthonairovirus	Nairoviridae	Bunyavirales	Negarnaviricota	RNA	PP211229	CCCTCGGGCTCGCCCCCCCGATTTCCAAAGACTTTTCATTAAAGAAAAACCACTGAACAAGGTTTATTGTGGTCCTTGAAACTACAAACTTTGTACTGACAGAGCCGACTTCGGAAGGACCCTGCCAGTGCACTTCTGTCTAAGTTGAACTGAGCACCACTATATAACACTTGGACCTGGTATAGTGAGGCCATTACCACTCAGGCCCAGGAATGGCATCTAGTAAGCTCAGGGATGTATTGGTTAGCTTCCAAAAGGATGTACGTGGTGGTTGTACATTGACCGAACAAACAGCCACCATAGCCTGGACCAGGTACAATCTTGAACCCTCTGGACCAGTTGGCCTAAGTGCACAGCAAGTGCTGGGATTGCTCATGCTAGATGACAGCACAGTTGGCC…
Beiji nairovirus	14935	TRUE	TRUE	FALSE	4810	99.38	4810	UXX19123.1	Beiji nairovirus	Orthonairovirus	Nairoviridae	Bunyavirales	Negarnaviricota	RNA	PP211350	ACGCTATCTACTTTTTCTTTTCTTTTTTTTTTGACGGTCTTTTTTTCTATCCCCCCGATTTCCAAAGACTTTTCGTTGAAGAAAAACCGCTGAACAAGGTTCATTGTGGTCCTTGAAACCACAAGTCTTGTACTGACAGAGCCGACTTCGACAAGACCCTGCCAGAACACCTCTGTCTAAATTGAACTGAGCACCACTATACAACACCTGGACCTGGCATAGTGTGGCCATTACCACTCAGGCTCAGGAATGGCATCTAGTAAGCTCAGGGATGTATTGGTTAGCTTTCAAAAGGATGTACGTGGTGGCTGTACATTGACTGAACAAACAGCCACCATAGCCTGGACCAGGTACAATCTTGAGCCCCCTGGACCAGTTGGCCTAAGTGCACAGCAAGTG…
Cardiovirus B	2056	FALSE	FALSE	FALSE	2305	97.5	684	AWK02679.1	Cardiovirus B	Cardiovirus	Picornaviridae	Hepelivirales	Pisuviricota	RNA	PP211230	TTTGCCCAAGTTCAGACCCGTCACAGTTGCCCACTACCCTGCAGTGGATAGGAGAATCACCTATGACCTTACGGTTACGGCTGGTCCTGCCTGTCAGACAGAGAATGGAATGCTTGACGTGGAGAAAGCTTTTGCTGAAATTCCTGACTCCAAACCTCAGTTAGACTGCTTCAGTTCAGACTGCCCTCTCTTGCACAAGAGGGGAGTGCTCTTTACATGCAATAGAACAAAGAAGGTTTACAATCTCCAACAAGTGGTAAAAATGGTTAATGAAACAATTCTTAGGAAAACAGAAAATGTTAAAAGAATCAATCAATTAGTGGCTCAATCACCAAGTGATGACTTCGACCACATTGTTACGTGCCTCCGGCAGAACAATGCTGCGTTGCAGGATCAAAT…
Cardiovirus B	2626	FALSE	FALSE	FALSE	2305	97.4	841	AWK02679.1	Cardiovirus B	Cardiovirus	Picornaviridae	Picornavirales	Pisuviricota	RNA	PP211231	CCAATTGGACTGCTTTAGTACAGACTGCCCCCTCTTACATAAGAGGGGAGTGCTCTTTACTTGTAATAGAACAAAGAAGGTTTATAATCTCCAACAAGTGGTAAAAATGGTTCATGAAACAATCCTCAGAAAAACAGAGAATGTCAAGAGAATTAACCAACTTGTGGCTCAATCACCTCATGATGACTTTGAACACATTGTTATGTGCCTCCGGCAGAACAATGCTGCACTTCAAGATCAGATTGATGAATTGCAAGAAGCTTTTGCGCAAGCGCAAGAGCGTTCAAATTTCTTGTCAGATTGGTTAAAAGTTTCAGCCATTGCTTTTGCAGGGATAGCCTCCCTGTCTGCAGTTTGTAAATTGGTTTCAAGAGTAAAGAACATGATTTGGCCCCAACC…
Cardiovirus B	8095	TRUE	TRUE	FALSE	2305	96.1	2305	AWK02679.1	Cardiovirus B	Cardiovirus	Picornaviridae	Picornavirales	Pisuviricota	RNA	PP211351	GCCCGGGGGGTCTCCCCCGCGCACACTGGTCACAGTGTGCGCGGACGAAGACCACCCCCCGGCAACCCCCTTTGGACGCGGGACCTGCGATAGTGCCAACCCCAGCCTTTCCTATACCCGACCCCCGACCCTAACCCAGGGTCCTCGGAAGAGGATCATTTATCTCATCCCCTGGATGCTGACTAATCAGAGGAAAGTTAGCATTTTCCGGCCCAGGCTAAGAGAAGTAGATAAGTTAGATTCAAATTGATACAACATCCCCTTGACGAATTCGCAACGAAAAACCGTCCCTCACTTGCCGCTTGATCACACCCACGAACTCATAATTCGGCCCCTCGTGACAAGCCCCTTGTTGAAACGGCCTCTTTCAATGCGACGTGGTTGGAGATTTGCCATCTA…
Cardiovirus B	8016	TRUE	TRUE	FALSE	2305	96.4	2305	AWK02679.1	Cardiovirus B	Cardiovirus	Picornaviridae	Picornavirales	Pisuviricota	RNA	PP211352	CCAGGGTCCTCGGAAGAGGATCATACATCTCATCCCCCGAATGCTGACTAATCAGAGGAAAGTTAGCATTTTCCGGCCCAGGCTAAGAGAAGTAGATAAGTTAGACTCAAATTGATACAACATCCCCTTGACGAATTCGCAACGAAAAGTCGTCCCTCACCTGCCGCTTGATCACACCCACGAACTCACAATTCGGCCCCTCGTGACAAGCCCCTTGTTGAAACGACCTCTTTCAATGCGACGTGGTTGGAGATTTGTCATCCTATGACTCCGACGAAACTACCATCATGCCTCCCCGATTATGTGATGCTATCCGCCCTGCTGGGTGGAGCATTCTCGGGTTGAGTAACCTATATCCTTTATCCCTTGGACTCCGGTCCCCCGGTCTAAGCCGCTTGG…
Cardiovirus B	5564	FALSE	FALSE	FALSE	2303	95.7	1818	AWK02687.1	Cardiovirus B	Cardiovirus	Picornaviridae	Picornavirales	Pisuviricota	RNA	PP211232	CACCAACTCTGTCCCAGACACGGCCTTGGTGACCTATCAAGTAGCTCTCTCCTGTTCTTGTATGTCAAACTCTATGCTGGCTGCTGTCGCTCGCAACTTCAACCAGTACAGAGGTTCTCTTAACTTTACTTTCGTTTTCACGGGCACTGCTATGACCAAAGGCAAATTTCTCATCGCCTACACTCCCCCCGGTGCGGGGCAACCCGTTGACCGAGACCAAGCGATGCAGTCAACCTATGCCATTTGGGATCTTGGCCTAAATTCAAGCTATGTGTTTACAGTGCCCTTCATTTCCCCTTCCCACTACCGCCAGACCAGCTACACCAGTCCGTCGATTACAGCAGTCGATGGTTGGCTCACTGTTTGGCAACTTACTCCTCTTACCTACCCTGCCAACAC…
Cardiovirus B	2071	FALSE	FALSE	FALSE	2303	97.8	648	AWK02687.1	Cardiovirus B	Cardiovirus	Picornaviridae	Picornavirales	Pisuviricota	RNA	PP211233	CTACTATGCAGACAAAGCCCAAATTACACAGAGCTGTTTATTACTGAAAGCACATCTCCTCGTGGTTAACCGCCATGTGGCAGAAACCGACTGGACAGCGTTCGAGCTGAGAGATGTTCGGCATGAAAGACAGACGGTGTGTGTAAGGTCAGTGAACAGATCTGATATGGAAGTAGATTTGACCTTTATGAAAGTTACCAAAGGACCACTCTTTAAGGACAACACCCAGAAATTTTGCTCCAAAGATGACCCTTTCCCGAACCGAAATGATATTGTCATTGGTGTGATGAATACTGGACTGCCCTTTGTATTTAATGGAACATTTGTGATTGGCAACCAGCCCGTGAATACAACAACAGGAGCGTGTTTCAATCATTGTCTTCACTACCGTGCAAACAC…
cardiovirus C1	1252	FALSE	FALSE	FALSE	2303	96.4	417	YP_009505602.1	cardiovirus C1	Cardiovirus	Picornaviridae	Picornavirales	Pisuviricota	RNA	PP211234	TTCATCTCAAAGAATGACCCATTCCCACTACCCATGACCCAGATCACCGGGGTCAAGAACTCTGACACAGCAACACTTTACACAGGTACATTTGTAAAGGCCCAGACACAGATTTTCTCAACAGCAGGCAATCAGTATGGCAATGCATTCCATTATAAGGCAAACACTTATAAGGGATTCTGTGGTTCAGCAATTTTTGGGAAATGTGGAAATTCAGACAAAATAATTGGCTTTCACTCTGCAGGCGCCTCTGGCGTTGCAGCAGGCAGCATTCTCACCCGTGAGATGCTGGAACAAATTTGTGCAAATCTAGGCCCAACTCCCCTAGAAGAACAAGGTGCTCTGACTCTCATTGGCACAGGTGAAATCTCCCATGTCCCAAGAAAGACCAAACTCAGA…
cardiovirus C3	6741	FALSE	FALSE	FALSE	2303	93.4	2204	AWK02683.1	cardiovirus C3	Cardiovirus	Picornaviridae	Picornavirales	Pisuviricota	RNA	PP211235	AAAGCCTTCAACCAACCCAAATCAGTCAGGAAATACAGGTACAATTGTTTATAATTATTATGCAAATCAGTACCAAAATTCAGTGGATTTGTCCGGATCCGCTTCGAGCGCTTCCGGAGCACCGACTAAGCCCACAAATGCGCTTGGAAGTGTGCTTTCAGACGCAACCTCTGCCTTTGCTACTATGGCGCCTCTTCTCATGGATAATGACACAGAGACAATGACCAACTTGGCTGACAGAGTTTCTACAGACACGCAAGGCAACACGGCCGTAAACACTCAATCTTCGGTCGGCCGTCTCTGCGCTTACGGCGCAGAGCACACAGGAGATGCTCCAACTTCCTGTGCAGATGAACCCACATCCGATGTCCTTGCTGCAGAGAGATACTACACTATCAC…
cardiovirus C3	6741	FALSE	FALSE	FALSE	2303	92.8	2204	AWK02683.1	cardiovirus C3	Cardiovirus	Picornaviridae	Picornavirales	Pisuviricota	RNA	PP211236	AAAGCCTTCAACCAACCCAAATCAGTCAGGAAATACAGGTACAATTGTTTATAATTATTATGCAAATCAGTACCAAAATTCAGTGGATTTGTCCGGATCCGCTTCGAGCGCTTCCGGAGCACCGACTAAGCCCACAAATGCACTTGGAAGTGTGCTTTCAGACGCAACCTCTGCCTTTGCTACTATGGCACCTCTTCTCATGGATAATGACACAGAGACAATGACCAACTTGGCTGACAGAGTTTCCACTGACACGCAAGGCAACACGGCCGTAAACACTCAATCATCAGTCGGCCGTCTCTGCGCTTACGGTGCAGAGCACTCAGGAGAGGCACCAACCTCCTGTGCAGATGAACCTACATCTGATGTCCTTGCTGCTGAAAGATACTACACCTTGTC…
Chicken picobirnavirus	471	FALSE	FALSE	FALSE	419	88.4	43	AXL64612.1	Chicken picobirnavirus	Picobirnavirus	Picobirnaviridae	Durnavirales	Pisuviricota	RNA	PP211237	AGTTGGAGATGGCAAAACTGCTGACGTACTGAGAGGCATGGCGACCTTATCAGGGAAGTCTGTTTGTCTTCCTAAGACCGCTTGGCCTCCGACTTGCGAAGCCGAGACGGCGGGAGGCGGGGAGGAGACCGAGAGAGATCAGAGAGGGAGAGGGAAGGGGCGCGGTGGCGCCCGGGGGGGGCGAGAAGCGCGGGCAGAGGCGAGAGCGAGCGGGGCCGAGCGTAGAAAGATTTCAGGATCCTAGATTTTGGGATGCGAAGGCCGTCGCCTTACGGCAACTAAGTATCCTTGAGAATGTGAAATACCATCCTCTAAAAGAACAGTTTGTTGACTTTTGCATGGAACGGGAAGTCGGATCGTAGCCATGTCGTTCTGTGAGCCAAGGAGTTGGAGATGGCA…
Cricetulus longicaudatus anello-like virus	581	FALSE	FALSE	TRUE	156	75.5	110	UQF10862.1	Pigeon torque teno virus	unclassified	Anelloviridae	Unclassified	Unclassified	DNA	PP211316	CCATAAAACACCACTGACCAGAAACGTCCGGAACGCAAGGACCTGCCACGCTTTCGGCTGCTGATACCAGAAAACCAGCGCCCAACTGGCGCTACGCCAGTCGGCACCGGCGTTCCAGATCCCGGGACGGCAGCCGAGACGCCTTTCGTGCCCCTCGAACGCAACGAGAGCCCAGGATCGTCTGAGAGGCGCAAGGCAGGCGTCCCGAACTACACCACAACGCAGACACCGGCTGGAGCTGCCCTGCCCGGCACACGCTGGCGTCGCACTGTAAAGTTCCCTGGGCCCTTTACCCGCCCAAAGGGGACTGTTCCTGGATGGCCCTTTCCCTTACCAGAACTTTACCCCCATCCCTGTCATTCCCAGCCCCTTCCCAGCCCCCCAGCCTCCACTTAGCTT…
Cricetulus longicaudatus anello-like virus	516	FALSE	FALSE	TRUE	156	62.6	99	UQF10862.1	Pigeon torque teno virus	unclassified	Anelloviridae	Unclassified	Unclassified	DNA	PP211317	CGCACACACACACACAGAGACGGCGGCGCTGGCGCACACACACACACAGAGACGGCGGCGGCACGGCTTTAAACCTTCAAGATGCTGGGAAGAAGTGCCAGTCCCTTAGACTGGATGGGTGGAGAGCAGAGCTGCTGTTGCAGCCCAGAACTACACCGTAAAACACAACTGACCAAAAACGTTCAAGATGCAAGAACCGTGCGCCCTTTCGGCTGCCGATACAAGAAAACCGGCAGCCTAGTGGTGCCAAGCTGATCGGCACCGGCTTTCCAGACCCTGGGATTGCACTTGAAATGACTTTCGTGCCCCTGGAGCGCAATGATACCCCAGGATCGTCTGACAGGTGCGAGGCAGTTTCCCGAACTACGCGACAGACGCAGGCTGGAGCTGCCCTGCCCG…
Cricetulus longicaudatus anello-like virus	381	FALSE	FALSE	TRUE	156	75.5	102	UQF10862.1	Pigeon torque teno virus	unclassified	Anelloviridae	Unclassified	Unclassified	DNA	PP211318	ACAGTACAAAGGCACGCAGCACATCATAACTGACTGGAAACATCCCAAATGAAAACACCATCCACACTTTTGGCTGATGACACGAGAATCCAGGACCCAATTGGCACCAAGTCGATTGGCACTGGCGTTCCAGATCCTGGGATGGCACCCGAGAGGCACGTTGTGCCCCTTGAGCACAACGAGACCCCAGGATCGTCTGACAGGCGCAAGGCAAGCTTCCCGAACTACACAACGCAGACACAGGCTGGAGCTGCCCTGCCCGGCACACGCTGGCGTCGCACTGTAAAGTTCCCTGGGCCCTTTACCCGCCCAAAGGGGACTGTTCCTTGACGGCCCTTTCCCTTACCAAAACTTTACCCCCATCCCTGTGATTCCCAGCCC
Cricetulus longicaudatus anello-like virus	1109	FALSE	FALSE	TRUE	156	75.5	102	UQF10862.1	Pigeon torque teno virus	unclassified	Anelloviridae	Unclassified	Unclassified	DNA	PP211319	GGCACAAACACACAGAGACGGCGGCACTGGCACAAACACACGAGGCTGCTGCAAGACTAAGAACTTCTTCCCAGCATCTTGAAGTGCCAGTCCCTTAGACTGGATGGGTAGAGAGCAGAGCTGCTGACGATGCAGCCCAGAACAAGACCATAAATCACAACTGACCAGAAACATCCCAAATGCAAACACCATCCACACTTTTGGCTGATAACACAAGAATCCAGGACCCAATTGGCACCAAGCCAATTAGCACTGGCATTCCAGATCCTGGGATGGCACCCGAGAGGCACGTTGTGCCCCTTGAGCACAACGAGACCCCAGGATCGTCTGACAGGCGCAAGGCAGGCTTCCCGAACTACACAACGCAGACACAGGCTGGAGCTGCCCTGCCCGGCACGC…
Cricetulus longicaudatus anello-like virus	613	FALSE	FALSE	TRUE	156	79.4	102	UQF10862.1	Pigeon torque teno virus	unclassified	Anelloviridae	Unclassified	Unclassified	DNA	PP211320	CCTGCAGGGAGGCAGCGGTGAAGCAAGGAGTCTCTACTGCAACCCCAGAAAAAAATAAGAGCCGAACATCATAGCCCCTTATGAGACGGCGGCGCTGGCGCAGACACACAGAGACGGCGGCGCTGGCGCAGACACACAGAGACGGCGGCAAGACCAAGAACTTCTTCCCAGCATCTTGAAGTGCCAGTCCCTTAGACTGGATGGGTAGAGAGCAGAGCTGCTGATGATGCAGCCCAGAACAACACCATAAATCACAACTGACCAGAAACATCCCAAATGCAAACACCATCCACACTTTTGGCTGATGACACAAGAATCCAGGACCCAATTGGCACCAAGCCAATTGGCACTGGCATTCCAGATCCCGGGATGGCACCTGAGATGCACATTGTGCCCCTT…
Cricetulus longicaudatus hepe-like virus	5422	TRUE	FALSE	TRUE	1757	72.6	1766	USZ80668.1	Sichuan tick hepe-like virus	unclassified	Hepeviridae	Hepelivirales	Kitrinoviricota	RNA	PP211353	ATAGTGTTCTCTTCGAGTCTTTTCGCAGCGCCCCTTCCTGCTTTCCCAGCCTCGTCCTAGCCCGTTTACGGCGATTCCGGACTCTTGTCCCACCGGAGATGCCTAACGTGGCGAAGTTCGTTCGCGAGCCTGGCCAGGATGCCCTGGCCTCCGCTGCAGCGCGCGAGCAGGTCGAAGCTGCCAACCGTGCTTTTCAGCACGTGTACCGTCTCCGTTATCGCCTCACGGCGGACGAGGAGAAATGGTTCGACAACGCTTTCCCAGACATGTTCTGGACGAATGGCCACCTCTGGGGCCACCCGCACGCAGCCGCCGGTGAGGTCCGCTTCGTAATGCGGAGGATCCTCAATCAGAAGATCAACAACGCCCCGTACGTCTCGTTCGGGGGTAAGGCAGACA…
Cricetulus longicaudatus mamastrovirus	1584	FALSE	FALSE	FALSE	396	89.5	373	QXV86603.1	Mamastrovirus sp.	Mamastrovirus	Astroviridae	Stellavirales	Pisuviricota	RNA	PP211238	GCCTCTCTGCCTCTGCCTCTGCCTCTGCCCCTCTACCCCTGCATACCCCAAGTGCCTTGCTTTTACAACTGAGCGGGACTATCTTGAGACTTATGGCTGGAGTACATATGTTAGGGAGTTCGCAAAAATAGACCATGGGGAAAGGCCTCCAATACTTTGGTATCTTTTCCTAAAGAAAGAAATTCTAAAAGAGGAGAAGATAAAGGAAGGTGACGTTAGGCAGATACTCTGTGCTGATCCTATTTACCAGCGGATCGGTGCGTGTTTCGAAAACCACCAAAATAGCCTAATGAAGGCAAACACTGCTACTTCATCTGGGCAGTGTGGCTGGTCACCGTTCTATGGAGGTTTTAGGAATGTCATGCAAAGACTACAGTCAAAGCCAGGCACGTTTGTTGA…
Cricetulus longicaudatus parvo-like virus	4093	FALSE	FALSE	TRUE	401	65.2	399	QTE03748.1	Psittacidae parvo-like hybrid virus	unclassified	Parvoviridae	Piccovirales	Cossaviricota	DNA	PP211321	ATTTCTTTTTTCGTCTTTTTTTCCAAGGTGGTGGTGGTAAAAAACAGATCAGATATGCCCTTCTTTTTGCCCCCCATATGGGGGGCACAGGGATCTGTTTTTTACCACCACCACCTTGGAAAAAAAGACGAAAAAAGAAATAGCGATATTCCACCAGTACCGGTCGTACTTAAGCGAATAACCCTAACAAAATAGTGGCATTCTAGGGTATGGCTCTTGGGACTATTTTGTGTATGATAAACCCTAATAGCGTTAAAGATCAACTGTATTACCAAACATTAATTGTTCCATCAAGTCATCGTCCGACTCTTCTTCACTGTCCGACTGTTCAAACAAACGTCTAGCTACATTTCTAGGCGACTCTTCCAATGGTGGATCTCCTACCTCGACAAATATACC…
Feline hunnivirus	2502	FALSE	FALSE	FALSE	2274	97.4	775	AYJ71467.2	Feline hunnivirus	Hunnivirus	Picornaviridae	Picornavirales	Pisuviricota	RNA	PP211239	GTGTGACTTGGCAATTGCAACTGACCCAAGAGATGATGAGGTGCTGAGTTTTCTCCGGAAGAATTGCGACCACGTGATCTTCGGAGCATATCTCAGACGCTTCTACGGATCTGGACCTGACCCCCTGAAACCACCACGGAAGTTCAATCTCCAGCAAGCGCTAGATGCAATTTCAATCATAACACAAGTATTAGCCCTCTTGCTTATGGTGTTTAGCCTTGGTGTGGTGATTTGGCAACTCTTCTCCTACCAGGGTGCCTATGGCGGTAATTCCACTGGCAAGAGAGACAAGAAACCAAATGGACTCAAGGTTGTTGACATTGCTTCGTTTCAAGGACCAATGAATTTTGATTTGGAGAGATCAATGCTGGACCGTAACATGGTCAGCATTGCCTACCG…
Gakugsa tick virus	587	FALSE	FALSE	FALSE	4811	97.7	128	QPD01615.1	Gakugsa tick virus	Orthonairovirus	Nairoviridae	Bunyavirales	Negarnaviricota	RNA	PP211240	GGATCTGTAGCTTATTAGTACCTGGATATACTAAGCAACTGGGCAAATCCCTTGCTTGTGTACTCCTCCAGTTACTGCTTGGGTCTGATTTGAATGACCAAGATTGCAGTGAGTTAGTATCTCAGTATCAATTATTGTCTCAAGGTATAGCACACTCAACAAAACCCGTCTCATTTGACTCAGATGAGGAGGAAGGGGAGATAGACCTGTTACAACTCCTCAAGGAAGCAGCAGAACTTGAGGCAAGGGAAAAAGGGAAAACGTTGACAGTAAGCACTGAGAAAGACAGTAAAACAGGTGAAAGCTCCTCTGCATTAGCAGTAGCACATAACACTCTAGACTTCATCAGGAGGTTTAATGAAGCATATGACAGTGATGATGAGGGTTGAACAGCACAAA…
Influenza A virus	920	FALSE	FALSE	FALSE	310	98.4	304	ACZ45866.1	Influenza A virus	Alphainfluenzavirus	Orthomyxoviridae	Articulavirales	Negarnaviricota	RNA	PP211241	ACAGAACGACATGGCTACGATCCGACTTGCCAGCGCAAAATGCTATAAGTACTACATTCCCTTACACTGGAGATCCTCCATACAGCCATGGAACAGGAACAGGATACACTATGGACACAGTCAACAGAACACATCAATACTCAGAGAAGGGAAAATGGACAACAAACACAGAGACCGGAGCACCCCAACTCAATCCAATTGATGGACCACTACCAGAGGACAACGAGCCAAGCGGATATGCACAAACGGATTGCGTGTTGGAAGCAATGGCTTTCCTTGAAGAATCCCACCCAGGGATCTTTGAAAACTCTTGTCTTGAAACGATGGAAGTCGTTCAGCAAACAAGAGTGGACAAACTAACCCAAGGTCGCCAGACTTATGACTGGACATTGAACAGAA…
Influenza A virus	1532	FALSE	FALSE	FALSE	757	100	495	AHL78983.1	Influenza A virus	Alphainfluenzavirus	Orthomyxoviridae	Articulavirales	Negarnaviricota	RNA	PP211242	TGTGAGAAACTCGAGCAATCTGGACTCCCTGTTGGAGGGAATGAGAAGAAGGCTAAATTGGCAAATGTCGTGAGAAAAATGATGACTAACTCACAAGATACAGAGCTCTCCTTTACAATTACTGGAGACAACACCAAATGGAATGAGAATCAAAATCCTCGGATGTTTTTAGCAATGATAACATACATCACAAGAAACCAACCTGAATGGTTTAGGAATGTCTTGAGCATCGCCCCTATAATGTTCTCAAACAAAATGGCGAGATTAGGAAAAGGATACATGTTTGAAAGTAAGAGCATGAAGCTAAGAACACAAATACCGGCAGAGATGCTTGCAAACATTGATTTGAAATATTTCAACGAATCAACGAGAAAGAAAATCGAGAAAATAAGACCTCTG…
Influenza A virus	1232	FALSE	FALSE	FALSE	407	99.3	400	QON07811.1	Influenza A virus	Alphainfluenzavirus	Orthomyxoviridae	Articulavirales	Negarnaviricota	RNA	PP211243	GCCCACAGAACGACATGGCTACGATCCGACTTTTAGGAAAAGGATACATGTTTGAAAGTAAGAGCATGAAGCTAAGGACACAAATACCGGCAGAAATGCTTGCAAACATTGACTTGAAATACTTCAACGAATCAACGAGAAAGAAAATCGAAAAAATAAGACCTCTGCTAATTGATGGCACAGCCTCACTGAGTCCTGGAATGATGATGGGCATGTTCAATATGCTGAGCACAGTATTGGGAGTCTCAATCCTGAATCTTGGGCAAAAGAGGTACACCAAAACCACATACTGGTGGGATGGACTTCAATCCTCTGATGATTTCGCCCTTATAGTGAATGCACCGAATTATGAGGGGATACAAGCAGGAGTGGATAGGTTCTATAGGACCTGCAAACTGG…
Jingmen Apodemus agrarius jeilongvirus 1	19691	TRUE	TRUE	FALSE	2184	99.4	2184	WKD80555.1	Jingmen Apodemus agrarius jeilongvirus 1	jeilongvirus	Paramyxoviridae	Mononegavirales	Negarnaviricota	RNA	PP211354	GATGTTTGGTATAACAATATCTGTCAAAATGAATGACAAATTCTTAGGAGCAAAGACTCTTTTTTCTGGTGTTGGGCTTGGATATACCAAAATGTCTAAGCTTGGATCAGTCCTAGAAGAGTTTCGCTCTCATAAGAATGCACCTCCCAAAAGAGGTATATTGACAGCAGCTCTACAAGGTCTCAAGAAGAATGTTGTGATTCCGGTCCCTATGATGAAGGATCCTTCTAAAAGATTCCACTTTATAACGTTTTGTCTACAGCTTGTTTGGTCAGCAAGGTCATCGGGAGCTTTCATAACAGGAGCTATGATGAGTTTGCTATCTGTCTTTGCCGAAAATCCAGGTGCAATGTTGAGATCTTTGTTAAATGACCCTGACATAGATGTCCAAATTGCTGA…
Jingmen Apodemus agrarius jeilongvirus 1	307	FALSE	FALSE	FALSE	2199	96	80	WIU81510.1	Mus musculus jeilongvirus	Jeilongvirus	Paramyxoviridae	Mononegavirales	Negarnaviricota	RNA	PP211244	CTTATAATCCAAATAAGATTAAGCTAGATGAAACTGAAAATAGACAGATTTTTATCAAGT ATCCTATGGGGGGCATAGAAGGTTACTGTCAAAAAATGTGGACTATTATCACAATCCCTC TGTTGTTCCTTAGTGCTTATGAATGTGGTGCTAAGATTGCAGCTGTAGTTCAAGGAGACA ATCAAGCTATAGCAATAACCAAGAGAGTACATCCAAATCTGCCATACAAACAAAAGAAGT ATCTCTGTTCTAAATTGGCTCAGGAGTATTTCAATCGTCTAAGGATCAACATGGGTGGAA TAGGGCA
Lasius neglectus virus 1	456	FALSE	FALSE	FALSE	2194	88.2	152	UXD80120.1	Lasius neglectus virus 1	Sopolycivirus	Polycipiviridae	Picornavirales	Pisuviricota	RNA	PP211245	TGGAAACATGGAATATATGATCAAATGTCAGTGACTGAGAGATATCGTGATTCTCGAAGACTTCCAATTTCTCATTTACTTTTTGGTTCCCCAACTATGTTTAAATCTGGAGCAACTGAAATTGTCTCCGATGCTATTGGAAAGAATATGCCTGAGTTTACTGAAACTATTTCAAAAGTAGTTGATGCTAAGCTTAAAGAAGCTCCTAATATGTTGAAGAAGACAATTCAAGATACTCTTAGTGATCCTGATACTATTACAACTATTCGCGATACAATTACAAATGTTATGCAGCCTACAATTAATCAATTTTCACAACAAGCAACTGATATAACAGAATCAACTCTGCGTAATATTGAGTCCACTCTTGGTCCAGTTATGGATCAAACTTTTAATCTT…
Lasius neglectus virus 1	545	FALSE	FALSE	FALSE	2194	97.8	181	UXD80120.1	Lasius neglectus virus 1	Sopolycivirus	Polycipiviridae	Picornavirales	Pisuviricota	RNA	PP211246	TGAAGATTTTAGAACGTGTGAAACAACTACTGAATTGTGGTCTTTAACTAATTTTCAACATCAACAATCTGTTGAAATCCGAGATAATTGTATTCCCGCTGAAAAGATAACTCTTTCAGCTCCAGATGGCCGCCGTGGAGAAATCGCGATGGCTATTATGGTTGAAGGAGCAACTATTGCTGGCAAGTCTGGCAGTATGTTGATGATCCCGTCCCGAAAACCAGGACATAGATCAATTGTAGGAATACAAGCTTGGAAAGTTAATGATTTTTACAAGAAGACCATAATTTATCAAGTTGTCACACAAGAAATGCTTCAAGATATGATAAAACAAGTTCAATTTCAAGTAAACCGTCCTGTTATCTCTCAAGAGGGTCCACTAGTTTGTGAGCCCACGGT…
Lasius neglectus virus 1	1033	FALSE	FALSE	FALSE	2194	98.8	343	UXD80120.1	Lasius neglectus virus 1	Sopolycivirus	Polycipiviridae	Picornavirales	Pisuviricota	RNA	PP211247	GCGTTACTGGAATCCGTGAACCCGGATCAAATCCAGTGGACTGCCGTGCATCAGCAGGTCTCCCTTATATCTGGGATAAATTTCCCGGAAAATTAGCTGGTAAGAAATCTTATGTTCAGATAGATGAGCTCGGAGAATGTCAAGTTCAATCAGAAGAATTCCGTAAAAATTTTGAGTCAACTTTTGAAAAGTTGGCTCGTGGTGTTATTCCAAAACATACCTCCTATGATTTCCCTAAGGACGAACTTCGTCCCTATTATAAAGCTTTAGGTGATCCTATTAGTCAAACTCCACCCAAGACTCGCTCAGTGACATGCATGAATATGGAATTTATATTTTCATGGCGGCGTGTTACTCTTGATTTATTTGCCTCACTTCATCGTGCGGCACGTGGAGATT…
Lasius niger virus 1	305	FALSE	FALSE	FALSE	2145	97	101	YP_009407943.1	Lasius niger virus 1	Sopolycivirus	Polycipiviridae	Picornavirales	Pisuviricota	RNA	PP211248	CTCAGGGCATAAGTCTTCCGGCGACTGGTTGGAATTATGAACAATTCATATCAAATTGCGCCGTAAGATTTTCTGCATTTAGAGGAGCTGAAGGAACATATTCTGCTCAAAAGAAATATGGTCATGTGGAAAACTGTTTGGAGGAAATTGATGCGCTTCTTGATCAACGATCCGATATACCCGATGCCCCCGAATTACCAATAACAAATTCGATACGCCGATTGTTCTGTAGAGCACAACATCCATATGGTACCGTTGACGAACTAGGAGAAAAGATTTTTTCTGGAGAAAAACTGGCACCCGAA
Longquan Niviventer fulvescens orthohantavirus 1	6512	TRUE	TRUE	FALSE	2151	98.79	2151	UBB42253.1	Longquan Niviventer fulvescens orthohantavirus 1	Orthohantavirus	Hantaviridae	Stellavirales	Negarnaviricota	RNA	PP211355	AAGTGACAATTAACTAGAAAAATGGAGAAATATAGAGAAATTCACAACAAACTGAAGGAGTTTACTATTGGGACACTCACAGCAGTGGAGTGTATTGATTATTTAGATAGGCTTTATGCAGTTAGGCATGACATTGTTGATCAGATGATAAAGCACGATTGGTCAGACAATAAGGATTCAGAGGAGCCGATAGGGAAAGTTTTATTGTTTGCAGGAGTGCCAAATAATGTTATTACAGCCATGGAGAAGAAAGTTATCCCCAATCACCCAACAGGAAAGAATCTAAAAGCCTTCTTTAAGATGACTCCAGATAATTATAAGATCACAGGATCAACAATTGAGTTTATAGAGGTTACAGTGACAGCAGATGTTGATAAAGGAATTAGAGAAAAAAGGCTC…
Longquan Niviventer fulvescens orthohantavirus 1	6542	TRUE	TRUE	FALSE	2151	98.79	2151	UBB42253.1	Longquan Niviventer fulvescens orthohantavirus 1	Orthohantavirus	Hantaviridae	Stellavirales	Negarnaviricota	RNA	PP211356	CTCACAGCAGTGGAGTGTCCCAATAGTAGACTCCGGAAGTGACAATTAACTAGAAAAATGGAGAAATATAGAGAAATTCACAACAAACTGAAGGAGTTTACTATTGGGACACTCACAGCAGTGGAGTGTATTGATTATTTAGATAGGCTTTATGCAGTTAGGCATGACATTGTTGATCAGATGATAAAGCACGATTGGTCAGACAATAAGGATTCAGAGGAGCCGATAGGGAAAGTTTTATTGTTTGCAGGAGTGCCAAATAATGTTATTACAGCCATGGAGAAGAAAGTTATCCCCAATCACCCAACAGGAAAGAATCTAAAAGCCTTCTTTAAGATGACTCCAGATAATTATAAGATCACAGGATCAACAATTGAGTTTATAGAGGTTACAGTGACA…
Longquan Niviventer fulvescens orthohantavirus 1	7088	TRUE	TRUE	FALSE	2151	98.74	2151	UBB42253.1	Longquan Niviventer fulvescens orthohantavirus 1	Orthohantavirus	Hantaviridae	Stellavirales	Negarnaviricota	RNA	PP211357	GAAAGGGCGCATGGTGAATGCCTTGGCATCAGGAGCCGATGAAGGACGCGATAAGCTGCGAAAAGCTTCGGGTAGGCGCACATAGCCTGAGATCCGAAGATCTCCGAATGAGGAAACTCACATGGGAAACCCCATGTATCATTAACTGAATACATAGGTTAATGAAGGTAAACCCAGGGAACTGAAACATCTAAGTACCTGGAGGAAGAGAAAGAAAAATCGATTTTCTTAGTAGCGGCGAGCGAAAGGGAAAGAGCCCAAACCAGAGATTTATCTCTGGGGTTGCGGACAGAGCATTAACGAGAAGTCGTGACTAACCGAACATAACTGGAAAGTTAGACCGTAGGAGGTAATAGTCCTGTAGGTGAAAGTTAAGACAATCAAGCTCTGATCCAGAGT…
Longquan Niviventer fulvescens orthohantavirus 1	6585	TRUE	TRUE	FALSE	2151	98.79	2151	UBB42253.1	Longquan Niviventer fulvescens orthohantavirus 1	Orthohantavirus	Hantaviridae	Picornavirales	Negarnaviricota	RNA	PP211358	CTCCGGAAGTGACAATTAACTAGAAAAAATGGAGAAATATAGAGAAATTCACAACAAACTGAAGGAGTTTACTATTGGGACACTCACAGCAGTGGAGTGTATTGATTATTTAGATAGGCTTTATGCAGTTAGGCATGACATTGTTGATCAGATGATAAAGCACGATTGGTCAGACAATAAGGATTCAGAGGAGCCGATAGGGAAAGTTTTATTGTTTGCAGGAGTGCCAAATAATGTTATTACAGCCATGGAGAAGAAAGTTATCCCCAATCACCCAACAGGAAAGAATCTAAAAGCCTTCTTCAAGATGACTCCAGATAATTATAAGATCACAGGATCAACAATTGAGTTTATAGAAGTTACAGTGACAGCAGATGTTGATAAAGGAATTAGAGAAAA…
Longquan Niviventer fulvescens orthohantavirus 1	6667	TRUE	TRUE	FALSE	2151	98.79	2151	UBB42253.1	Longquan Niviventer fulvescens orthohantavirus 1	Orthohantavirus	Hantaviridae	Picornavirales	Negarnaviricota	RNA	PP211359	GAGCCATTCGTCCCGGGAAACGGGGTGCGGCCGGAAAGGGGGCCGCCCTCTCGCCCGTCACGCTAAACGCACGTTCGTGTGGAACCTGGGGAAGCCTAGGGCGCGGGCCCGGGTGGAGCCGCCGCAGGTGCAGATCTTGGTGGTAGGCCGGAAGTGACAATTAACTAGAAAAAATGGAGAAATATAGAGAAATTCACAACAAACTGAAGGAGTTTACTATTGGGACACTCACAGCAGTGGAGTGTATTGATTATTTAGATAGGCTTTATGCAGTTAGGCATGACATTGTTGATCAGATGATAAAGCACGATTGGTCAGACAATAAGGATTCAGAGGAGCCGATAGGGAAAGTTTTATTGTTTGCAGGAGTGCCAAATAATGTTATTACAGCCATGGAGA…
Longquan Niviventer fulvescens orthohantavirus 1	6789	TRUE	TRUE	FALSE	2151	98.61	2151	UBB42253.1	Longquan Niviventer fulvescens orthohantavirus 1	Orthohantavirus	Hantaviridae	Picornavirales	Negarnaviricota	RNA	PP211360	TGGGCTCTTCCCTGTTCACTCGCCGTTACTGAGGGAATCCTGGTTAGTTTCTGACAATTAACTAGAAAAATGGAGAAATATAGAGAAATTCACAACAAACTGAAGGAGTTTACTATTGGGACACTCACAGCAGTGGAGTGTATTGATTATTTAGATAGGCTTTATGCAGTTAGGCATGACATTGTTGATCAGATGATAAAGCACGATTGGTCAGACAATAAGGATTCAGAGGAGCCGATAGGGAAAGTTTTATTGTTTGCAGGAGTGCCAAATAATGTTATTACAGCCATGGAGAAGAAAGTTATCCCCAATCACCCAACAGGAAAGAATCTAAAAGCCTTCTTCAAGATGACTCCAGATAACTATAAGATCACAGGATCAACAATTGAGTTTATAGAG…
Longquan Niviventer fulvescens orthohantavirus 1	6508	TRUE	TRUE	FALSE	2151	99.16	2151	WPV62100.1	Longquan Niviventer fulvescens orthohantavirus 1	Orthohantavirus	Hantaviridae	Picornavirales	Negarnaviricota	RNA	PP211361	GGAAGTGACAATTAACTAGAAAAAATGGAGAAATATAGAGAAATTCACAACAAACTGAAGGAGTTTACTATTGGGACACTCACAGCAGTGGAGTGTATTGATTATTTAGATAGGCTTTATGCAGTTAGGCATGACATTGTTGATCAGATGATAAAGCACGATTGGTCAGACAATAAGGATTCAGAGGAGCCGATAGGGAAAGTTTTATTGTTTGCAGGAGTGCCAAATAATGTTATTACAGCCATGGAGAAGAAAGTTATCCCCAATCACCCAACAGGAAAGAATCTAAAAGCCTTCTTCAAGATGACTCCAGATAATTATAAGATCACAGGATCAACAATTGAGTTTATAGAAGTTACAGTGACAGCAGATGTTGATAAAGGAATTAGAGAAAAAAGG…
Longquan Niviventer niviventer orthohantavirus 1	296	FALSE	FALSE	FALSE	2151	95.9	98	UBB42259.1	Longquan Niviventer niviventer orthohantavirus 1	Orthohantavirus	Hantaviridae	Bunyavirales	Negarnaviricota	RNA	PP211249	GAGAAAGAGGAAAAATTTGGAGAGTCCCTTGTTGAGAATGGTTACATGATTGGCGAGTTAAAGGAGGATTCAAGATTAGCTGAACAGCAGTTGTACTGTCAAGATGCAGTGGAGCTTGCAGCTATTGAGCTTAATAAAGTGCTTGTTACAAGATCACAAGTGGTAGCAAATAGTATTCTTAATAAGAATTGTGAAGAACCATATTTTAGCCAGACAAGAAATATTAGTTTAAAGGGTATGTCAGGTCAAGGTCAAGAAGATGGGCATTTATCATCATCTGTAACTATCATTGAGGC
Lyssavirus rabies	11394	TRUE	TRUE	FALSE	2127	99.8	2084	AEV43276.1	Lyssavirus rabies	Lyssavirus	Rhabdoviridae	Mononegavirales	Negarnaviricota	RNA	PP211362	CCCGGCGATGTATGTTCCTACTTGGCAGCAGCAATGCAGTTCTTTGAGGGGACGTGTCCGGAAGACTGGACCAGCTATGGAATCTTGATTGCACGAAAAGGAGACAAGATCACCCCAAATTCTCTGGTGGAAATAAAACGTAATGATGTAGAAGGGAATTGGGCTCTGACAGGAGGCATGGAGATGACAAGGGACCCCACCGTCTCTGAGCATGCATCTTTGGTTGGTCTTCTCCTAAGTCTGTATAGGTTGAGCAAAATATCAGGACAAAACACCGGTAACTATAAAACAAACATTGCAGATAGGATAGAGCAGATTTTTGAAACAGCTCCTTTTGTTAAAATCGTGGAGCACCATACTCTAATGACAACTCACAAAATGTGTGCTAATTGGAGTACC…
Lyssavirus rabies	11380	TRUE	TRUE	FALSE	2127	99.8	1994	AEV43276.1	Lyssavirus rabies	Lyssavirus	Rhabdoviridae	Mononegavirales	Negarnaviricota	RNA	PP211363	CTTCTTTGATCTTGTTGTTAAGCGTCATTTGCAAAGCAAAAATGTAACACCTCTACAATGGATGCTGACAGGATTGTATTCAGAGCTAATAATCAGGTGGTCTCTTTGAGGCCTGAGATTATCGCGGATCAATATGAGTACAAGTACCCTGCTATCAAAGATTTGAAAAAGCCCTGTATAACCCTAGGGAAAGCCCCCGACTTGAACAAAGCATACAAATCAGTTTTATCAGGCATGAATGCCGCCAAACTTGATCCCGACGATGTATGTTCCTACTTGGCAGCAGCAATGCAGTTCTTTGAGGGGACGTGTCCGGAAGACTGGACCAGCTATGGAATCTTGATTGCACGAAAAGGAGACAAGATCACCCCAAATTCTCTGGTGGAAATAAAACGTAAT…
Marmot picobirnavirus	1681	TRUE	TRUE	FALSE	539	86.1	538	AVX53279.1	Marmot picobirnavirus	Picobirnavirus	Picobirnaviridae	Durnavirales	Pisuviricota	RNA	PP211364	AAATTTTTATGAAAGGAGGCTTACATTATGCCGAAAAATAATGTAACAGAAAATCAGTATTTCGTACCTGAAGCGGAAGCTAGTCTCAAGACTTATTTTGGGCGTGTTCGTGATGGGCAACCCAACGTTTACGAGACACCGTTCGCCGAAGGTGAATCAATGTCAGAACTCATGACAAAGTGGAGGGAAACCCTAGTGTCAATCAAGGACGAGTGGCCTTCACTGTGGGAGTTTGAAGAGGACCTGGGCTCCAAGGTCGGGCCATTAAGCGTCATGAAGCCGCTGGAGGAGCGGATGAATGATGTGAACGCTTATTACGAGGATATTCTCCTATCCTCATCTGAGATTCGCAAACCAGCCCTCGAAAGAGTAACTCGCGAATTCAGCGCAATCGGAGGC…
Marmot picobirnavirus	1622	TRUE	FALSE	FALSE	524	84.7	524	AVX53292.1	Marmot picobirnavirus	Picobirnavirus	Picobirnaviridae	Durnavirales	Pisuviricota	RNA	PP211365	CTTAATTTATTAAGAAAGGAGGTTAGCTTATGATTACGAAGCTACCTAAAGAGTTCTTGTCCGTTATCTCTGAAAACAACGGTCTCAAACAGTACCTGTCTAATCTATCACAAGGCAGGCAGTTTACGCCTAGATCGTGGCTTTATGAAAGTCTCGACCCTCAGCAAATACTGGACAATTGGCTGAACATCTTATCCAGCCTTGAGAACGGCGACACCTTCGAGAATGAAGTGTTCCAGTTCGACATTTCGCAGCTAGCGAAATGGGGCCCCCAGGGCGGTATCAAACCGATATCTGACCTAATGACTGATGTTGTTGAGCCTACTTTTGCTCGTGGTGATTCACCTCGCCCGAAGGCTTTCAGCAGTAAGGATTGGCAGGGAGCGAAGGACCAGGCCG…
Mossman virus	343	FALSE	FALSE	FALSE	2205	93.3	105	NP_958055.1	Mossman virus	Narmovirus	Paramyxoviridae	Mononegavirales	Negarnaviricota	RNA	PP211250	AGCCTCCGAAACAAACTACATCTAGGAGATTAGTAGATGTCTTCATTAATGATGCAAAATTTGACCCTTATGAGATGATAACCTATGTTACATCTGGGGCATATCTGAATGATAAAGATTTCAATTTATCATATAGCCTCAAGGAGAAGGAGACTAAGAAGGTCGGGAGACTATTTGCTAAGATGTCGTACAAGATGAGGGCCTGTCAAGTAATAGCAGAATCCCTTATTGCGAACGGTGTTGGAAATTATTTTAAGGATAATGGAATGGCCAAGGATGAGCATGAATTAGCAAAAACATTACACCGACTTTCTATCGTCTGTGCCAAAAAATAACAAAATGC
Mukawa virus	6513	TRUE	TRUE	FALSE	2098	99.8	2098	WAK75724.1	Mukawa virus	Phlebovirus	Phenuiviridae	Bunyavirales	Negarnaviricota	RNA	PP211366	GCGATGTGAACCTACAGGATTTGGATAGGGAGAGTACAGTGGGCAGCACGATCACAAAGGCGCCCATTCATGGAACCAATTCTCTCTCGTATAGGAAACTTTCAAGGTTTTCAGAAACCCCAAGTGCAGCACCATGAGGCAGACCTCTTCAACACTGCACTACCATCCTTTCAGGTCTCCAATACGAAGGCTGGCCTATCTCTGGATGTGAACCTAGAGGATTTGGATAGGGAGAGTACAGTGGGCAGCACGATCACAAAGGACCAAGTGATCCCGATGGACCAGATCCTGAACTTTGTGCACGACTTCACTGTTGCTCATCTCACCAAGTCCACTGACTCTCGATTCTCGGAAGCCTTTCCCTTAATCGGGGATGGCTTTGATGGACACACCCCTGAT…
Mupivirus A	8387	TRUE	TRUE	FALSE	2380	87.1	2384	UYI58736.1	Mupivirus A	Mupivirus	Picornaviridae	Picornavirales	Pisuviricota	RNA	PP211367	CCTCACAATTTTGCAACCCCTTCTCCCTAGTGGAGAGGTTTAAGATTCTACCCTGCTTTTGCAGAGAGGGATCGGAAGAGGTTCGATTAACGCAGCGAACCAGATGCCTTCCGGCCCGAAGTAAAGTGTTCTGTATAAAGTGGATCTCGGACTAAGATTAACAAGATTAGGTTTTCCCATATTGCTGAATCCCATGCGTGTGCGGCTGAGCGAACGGCTATGGCGCATTGGGAGTAGCTCCCGGATTATGTAACCTGTATTCTTTGTTAGTCGGTGGTGAGACCAGCGGAAAGCACAACACCGCTTCCCCCGATTATGTGACATCTGGCAAGTGGGCGGATGGGAGCCCCTCAGAATCCCCGTCGCTCTAGACGGGTTGACTTTTAAATTTCCCATGCC…
Murine kobuvirus 1	4553	FALSE	FALSE	FALSE	2430	98.9	1435	UZS59131.1	Murine kobuvirus 1	Kobuvirus	Picornaviridae	Picornavirales	Pisuviricota	RNA	PP211251	CCCTCATCTTCCCGTCCCCGCTACCTCTCCGAAGAAGACCGTCGCGGTCGTCAGACAGGGTGCCAATTACACCCTGGGTGACGTCGACCCCGACGATCAGGTCTACATCATTCGTGCACAGCGTCCGACGTATGTGCATTGGGCTCTCCGCAAGGTGACCTATGATGGTAGCCTAAAGCAGATCTCTCTCTCACGAGATGGGATTCATGCTGTTGTCGCCTATGAACCACCAGAAGGCGACATCTTCCTGGAAGTCCTCCCCTCAGCCTGGACCCTTGCCGAGCTACAACTCGGCGACACCTGGGACTATAGTGCGGACAACAATTGCACGCACTTTGTCCAAAGGTGTACCAACACCTATCTCCCCAACACCGGCTTCTCATTGGCCCTCGGAGTCGG…
Murine kobuvirus 1	7593	TRUE	TRUE	FALSE	2430	98.7	1785	UZS59131.1	Murine kobuvirus 1	Kobuvirus	Picornaviridae	Picornavirales	Pisuviricota	RNA	PP211368	TCACCATCTTTCCGGTGGTCTGGACCCGGACCACCGTTACTCCATTCAGCTTCTTCGGAACCTGTTCGGAGGAATTAAACGGGCACCCACTTTCCTGTCCTCTCCCCTTTTCTGTAACTCAAGTGTGTGCTCGTAATCTTGACTCCCACGGGTTGGCCGCCCCGTTGGTGAATAAACTGCTAGGTCATCCCTCCCTACCCCTGGGTGCCGCTTCGGCGGTATCCACATCCTCCCCCCAGCCTGACGTGTCACAGGCTGTGCAAAGTCCCCGCGAAAGCTGCTAACGTGGCAATTGTGGGTCCCCCCTTTGTCAAGGAACCGAGTCTTTCTCCCTTAAGGCTAGACCCCTGTGTGAATTCACAGGCGGCAACTAGTGGTTCCACTGCATGCTCCCGACCT…
Murine kobuvirus 1	8239	TRUE	TRUE	FALSE	2434	94.8	2434	AWB14573.1	Murine kobuvirus 1	Kobuvirus	Picornaviridae	Picornavirales	Pisuviricota	RNA	PP211369	GGACCCGGACCACCGTTACACCATTCAGCTTCTTCGGAACCTGTTCGGTGGAATTAAACGGGCACCCACTTCCACTCCCCCTTACCCCCCCCCTCCTCCCGTAACTCTCAAGTGTGTGCTCGTAATCATGACGCCCACCGTGTCGCATCGCACGTGTTGGTGACCAAGCTGCTAGATGCACCTCCTCCCTCCCCCTGGGGCTGGCTACCACCAGCCTCACATCCTCCCCCCAGCCTGACATGTCACAGGCTGTGCAAGAACCCCGCGAAAGCTGCCACCGTGGCGATTGTGGGTCCCCCTCTTGTCAAGGCACAGAGTCTTTCTCCCTTAAGGCTAGACCCCCTTGTGAAGTCAAGGGCGGCAACTAGTTGTGCCACTACATGCCTCCGACCTCGGCCG…
Murine kobuvirus 1	7854	TRUE	TRUE	FALSE	2430	98.2	2430	UZS59131.1	Murine kobuvirus 1	Kobuvirus	Picornaviridae	Picornavirales	Pisuviricota	RNA	PP211370	CGACCTCGGCCGCGGAGTGCTGTTCCCCAAGTCACAACACTGACCTTCACTTATGTGCCTGGCAAGCATATCTGAGAAGATGTTCCGCTGTGGCTGCCAAACCTGGTAACAGGTGCCCCAGTGTGCGTAGTCTTCTTCCGTTTTCGGACGGTAAGTGTTAGGTAAAGATGCGGCGTAAGGTTCAAGTGCCAAAGCCCTGGAAGGGATGACCCTTCTACTGCCCTAGGAATGCCGCGCAGGTACCCCAGGTTCGCCTGGGATCTGAGCGCGGGCTAATTGTCTACGGGTAGTTTCATTTCCCTCTCTTTTCTTCTGGCATCATGGCGTTCTCACAGGTTCCCCGATCTGTGCGTTCTGCTGTTGCTGCTTCCTCCACCCACCGCGTCTACCACACAGTCC…
Murine norovirus	3222	FALSE	FALSE	FALSE	1677	93.8	857	ATZ76933.1	Murine norovirus	Norovirus	Caliciviridae	Picornavirales	Pisuviricota	RNA	PP211252	ATCAGATTGAGAAGAAGACCCGCCCTTCGTTTTACTGGGATCACGGTTACACCTATCGTGACGGACCCGGCGCCTTTGACATCCTCGATGAGGATGATAATGATGGTTGGTATAGCTCTGAAGGCAAGAAGGGCAAGAACAAGAAGGGCCGGGCTCGGCCTGGGGTTTTCAAGACCCGTGGGCTCACGGATGAGGAGTACGATGAATTCAAGAAGCGCCGCGAATCAAAAGGCGGTAAGTACTCCATTGATGACTACCTTGCAGACCGCGACCGCGAAGACGAGCTCCGCGAGCGCGATGACTTTGAGGAGATGTTTGGGGACGGCCCTGGACAGCGCGCCACACGCCGCTCCCGCAGAGCAGAGAGAGCCAAGATGGGGCTTGTCACCGGTGGTGACA…
Myodes rufocanus hepacivirus	8764	TRUE	TRUE	TRUE	2888	73.3	2908	CAH0532116.1	Hepacivirus myodae	Hepacivirus	Flaviviridae	Amarillovirales	Kitrinoviricota	RNA	PP211371	GGATAAAACCCGGGGGGCCAATTGTTGGTTGGTTGGTTACTCAATCAGCTCCCTTTTACCACCTGCAGCGTGAGGTCCAGGACTCTGGCAGGATGGTGGGCAAAGGCAAACCACGTGGACGCGTACAGAACGGCGTCTACATTGTTCACCCCAAGAAAACGGTGGACAAAGGTGTCAGGAGAAAACCCCGACAGCGTAGGGATTTAGGGGGCTGGAGGCGGTCCGCCATCGGTCCCCTGGACCCCTATGCAAGAATGGGAATGCAGGCCCTGCTTCCCTCTCCCGCGTACCCATCTCGGGATCCGCGGAGACAGTCTAGGTTCCTCGGTCACATCATAGATGGAACTCTAGGCTGGGCCACCGATATAATTCATCATATACCGGTGGTGGGTCCACTGC…
Myodes rufocanus parabovirus	7926	TRUE	TRUE	TRUE	2391	58.7	2379	AWK02673.1	parabovirus A2	Parabovirus	Picornaviridae	Picornavirales	Pisuviricota	RNA	PP211372	GGTGGATATACGCGATATCCACCCACTTTGCCTGAACCATACTTCATGCCCATGTGGCATGATGTATGGGGAGGCCCCTTTCTCCCCTCCCCCTCCTATTACCTTTTACCCCTCTTGTAACCGCTACGCTATACACGCTCGGTTCTTTAGCGGGTTCCGAGTAGACCAAGCAGCTACGCTACCTTGGGCTACGGCCCGGATCCCTCGGGATCCAAAGACTTAGAAGATGTACAAAACCGCCCAATAGGGGCCCCATATCCAATGGGGTCAAGGGCAAGCACTTCTGTTTCCCCGGTGATGTTTCATAGACTGTAACCACGGTTGAAAGAGACTGATCCGTTACCCGACTCAGTACTTCGGGAAGCCTAGTATGCAATGGATTTCTGATGTGCGTTGATC…
Myodes rufocanus parvo-like virus	2129	FALSE	FALSE	TRUE	389	74.1	170	QTE03706.1	Phoenicopterus roseus parvo-like hybrid virus	unclassified	Parvoviridae	Piccovirales	Cossaviricota	DNA	PP211322	CGGCAATCCTCTCCTACGTCTATCCAAAATACTTTAAGAAAAATCTTCACAACAAATTCTTCGATTTGTATGATCCTAAAGAACATAGTCATGTGTTGTTGGAAGACCTCGATCACGAAGCAGTCGAACGATTGGGAATTAACTTTATCAAAACCATTTGTGATGAAGCAGGATTTGCAGTCGACCAAAAATACAAAACGCCTCAACTAACGAGAACAACATGTCTAGTCACAAGCAATTTTCAAATTCCTTCGATTATGCCAGATGGAGCGGGAATCGAACAAAATACAGCTGCATTATTACGTCGTTTTTGGCATATTAATATTATGGCTCTGCTTCGCTTGCTTGGTCTTAAACTCTTACCAAAAAATGAGAGAACGGAACTTAAGAAGGATGGGA…
Niviventer confucianus aveparvovirus	1377	FALSE	FALSE	TRUE	401	52.4	189	WGL41068.1	Psittaciform aveparvovirus	Aveparvovirus	Parvoviridae	Piccovirales	Cossaviricota	DNA	PP211323	GGCATGGGCAAGAAACAAACTCAACTTTATGAAGATTCTTGGAACTCGTCCTTGTCCAGAAGCACCACTCGGTCGTTTCCCTGACGGAAGAACACTATGCATTTGGGGTCCACCAGGAACAGGAAAGAGTCTCTACGTCCAATGGAAATTCCCAAAGGCGTATTATCGTATGCCTGACAACTATACGTTCTGGGACGGATTCAATCCACGATACCATACTCATATCTACTATGAAGACATGGACAGAGCAACCTTCAATCAACGAAGTACTCCTCCGGGACAATGGAAAGTCTGGCTAGACGATCAAGGCAAGTACAACGCAAACATCAAGTTCGAGATGCCATGGTCCAACGTCAGACACCCTGTCATCATCACTTCCAACTTTCACCCATCAGACTG…
Niviventer confucianus iflavirus	1836	FALSE	FALSE	TRUE	2994	36.6	524	UBT12491.1	Varroa destructor virus 2	Iflavirus	Iflaviridae	Picornavirales	Pisuviricota	RNA	PP211253	CTCCATCTAAGGCTAAATACCGGTACGAGACCGATAGTCAACAAGTACCGTAAGGGAAAGTTGAAAAGAACTTTGATGAGAGAGTTCAATAGGAAGTGAAATGTCTGTTAGTGAAGGGCTTGTCGTGCATAGTGAAGTGTGTAGTATCTCTGACGATGAGCAGGTTGAGGCGCATGCGGGGTGTTTCGAGTATTTCGGGCGTGTGGTCGCGGGTTTGGAGGTGAGGACGCCGGTTGATACTAAATTTGAAAATACCCAGTTTGTTGGTGTTCTTGGAATTCCGACGAAGGAGCCATCTATTCTGTCATCTAGGGACCCTCGCTGGACTGGTCAGGAGTCCCCTCTTTTTGAGGGTATTCGCCATCATATGAACCCCTTGAAGTTGCTTAATCCGGATTT…
Niviventer confucianus jeilongvirus	18700	TRUE	TRUE	FALSE	2199	98.5	2199	WIU81518.1	Niviventer confucianus jeilongvirus	jeilongvirus	Paramyxoviridae	Mononegavirales	Negarnaviricota	RNA	PP211373	CTGAGATTTATGAATAAAAAACAAGAATTTGAATAAACTTAGGAAAAAAGTTCCTTTTTTCCCGGTTTGGACTTGGGTGTCCGAAAATGTCATCCTTAAATGACACAATCAGAGAATTCAAGCATTTCAAATCAAACCCCCATACTCGAGGTGTTCTACACTCTGCATTTCAGGGAGTCAAAAACAAGGTTATCGTTTTGGTCCCTGTAGGCCTTGATCCCCCTCAAAGATGGCTTCTGATGACTTTCCTTCTACAATTGGTCTGGTCTGAACTTTCACCAGGGTCTGTCATTACGGGGGCATTGATCTCCTTATTGGCTTTCTTTTCAGAGCAACCCGCTCAGCTAATTCAAGCCATGTTGGGTGATCCAGATATTGAAATCCAGATAATTGATGTTG…
Niviventer confucianus jeilongvirus	18728	TRUE	TRUE	FALSE	2199	99	2199	WIU81518.1	Niviventer confucianus jeilongvirus	jeilongvirus	Paramyxoviridae	Mononegavirales	Negarnaviricota	RNA	PP211374	TTTATGAATAAAAAACAAAAATGTAGATAAACTTAGGAAAAAAGTTCCTTTTTTCCCGGTTTGGATTTGGGTGTTCAAAAATGTCATCTTTAAATGACACAATCAGAGAATTCAAGCATTTCAAATCAAACCCCCATACTCGAGGTGTTTTACATTCTGCATTTCAGGGAGTCAAAAACAAGGTCATCGTTTTAGTCCCTGTGGGCCTTGATCCCCCTCAAAGATGGCTTCTGATGACTTTCCTCTTACAATTGGTTTGGTCTGAACTTTCACCAGGGTCTGTTATCACAGGGGCATTGATCTCCTTATTGGCTTTCTTCTCTGAGCAACCTGCTCAGCTAATTCAAGCCATGTTGGGTGATCCAGATATTGAAATCCAGATAATTGACGTTGTCAAAA…
Niviventer confucianus jeilongvirus	18710	TRUE	TRUE	FALSE	2199	99	2199	WIU81518.1	Niviventer confucianus jeilongvirus	jeilongvirus	Paramyxoviridae	Mononegavirales	Negarnaviricota	RNA	PP211375	TTTATGAATAAAAAACAAAAATGTAGATAAACTTAGGAAAAAAGTTCCTTTTTTCCCGGTTTGGACTTGGGTGTTCAAAAATGTCATCTTTAAATGACACAATTAGAGAATTCAAGCATTTCAAATCAAACCCCCATACTCGAGGTGTTTTACATTCTGCATTTCAGGGAGTCAAAAACAAGATTATCGTTTTAGTCCCTGTGGGCCTTGATCCCCCTCAAAGATGGCTTCTGATGACTTTCCTCTTACAATTGGTTTGGTCTGAACTTTCACCAGGGTCTGTTATTACAGGGGCATTGATCTCCTTATTGGCTTTCTTTTCTGAGCAACCCGCTCAGCTAATTCAAGCCATGTTGGGTGATCCAGATATTGAAATCCAGATAATTGATGTTGTCAAGA…
Niviventer confucianus morbillivirus	2447	FALSE	FALSE	FALSE	2195	96.1	815	WIU81475.1	Niviventer confucianus morbillivirus	morbillivirus	Paramyxoviridae	Mononegavirales	Negarnaviricota	RNA	PP211254	GAAGTGTATTATTTAACTTTTGAACTGGTACTTATGTTCTGTGATGTGATCGAAGGCAGGTTACAATCAGATACTGCTATGCAGCTTGATCCAAAATATCATAAGCTTAAGCCTAGAGTTCATCTGTTATGGGAGTTAATAGATGGCCTGTTTCTTGATTTAGGGAACAAAACATACAATATAGTAGCTTTGCTTGAACCTCTGGCTCTAGCTCACCTTCAATTGCTTGACAGCTGTACCTCTATAAGAGGTGCTTTTCTAAATCACTGTTTTGAAGAACTTGATGAAGTTTTAACATCAGAAGGGTACGACGATCCGGATGATCTGAGGGTACTTCATGATCAGATCTATGAAATATTCAATCCTGATGATATCCACTTAACAGCGGAGTTGTTTTCC…
Niviventer confucianus picobirna-like virus	1241	FALSE	FALSE	TRUE	2180	36.2	229	UYL95522.1	Nanchang Perib tick virus 1	unclassified	Peribunyaviridae	Bunyavirales	Negarnaviricota	RNA	PP211255	CTCTGCTAGCAAAACTGGAGTACACATGGCTGCAGGGCCATCTCAACTATGGGTCATCCTTTGAACACACTGGGATGGCACTATTCATGGTGGATTATATGAAAGAACGGTTTGCAAGAAACATAAAGGCCATGACAGCTGTGCACCAGGAGCACTCTGACGACAACCAAATGACTTTCATAGCCATTACAAACCTCACTGTGGAGGAATTTGTGCAAACTATCTGGAAGTGCTTCACATCAACATCCAAATTGACTTCATTAAAACCTTCAAAGAAGAAGACAAATGCTGGGTTGTTCATGAGGCAGTTCATTTCTCAGTACAACATTGCTGGAGAGCAGTTTTATCCGTATCCCAAGCAAGTCCTCTCTGCTGTTTCAGGAAATTCTTATGTGTCCA…
Niviventer confucianus qinvirus 1	5389	TRUE	FALSE	TRUE	1797	26.8	1089	YP_009330273.1	Beihai sesarmid crab virus 4	Yingvirus	Qinviridae	Muvirales	Negarnaviricota	RNA	PP211376	ATCTTATGGATACGACTCACCTTGGTTTTCTGCCTGTATGCGATCTTAGATGCTTGATTGCTTAGGCGGGTTCTCGGTATACAATTCAGATGTAGGCTGTGTGTTCTTCGTTGACCATGTCACTCGCAAAGTCATCGTTTCTGTTTGCATTTCAGATGGCCCACGTCTTCGATGTACCGACCTACGCTGACATGCTTGCACACCGAGTGGCTCGGTTTGTCGTCTTTCACGGTGCAAGCTCAAACGTCGATGTCACTGACATCATGAAGAACTCCGGTGTCTACAGGGAAGAATACTCTGCAAGGAGGTGCAAATTTCTCTGTTCACTGTATGCTGCTTCAACCGCCAGAAACAAATCAACCATTGTTGCTGCCTCACCTTCTGACATCAAACAAAAAA…
Niviventer confucianus qinvirus 2	4938	TRUE	FALSE	TRUE	1797	28.4	1097	YP_009330273.1	Beihai sesarmid crab virus 4	Yingvirus	Qinviridae	Muvirales	Negarnaviricota	RNA	PP211377	GCGCGGATGAACTGCTGGAGTCATACATAGCTGGAAATTACAGGCCTGCAATTTCCAACATGTCTACTTGTCGGCTAATTGTGAGGATCCTTGAAGGGAGGAAGTGGGTTACAGACTATGCTGCGCAGTGCACTCTGCTGTCCAAGGTACTGTTAGATGAAATAGACCTTGAGATTCCAGCATCACATACAGCTGCCATGAATAAAGCACTTACCGCCGCCTCTGATGTAACTAACATGCAGTTAACTTACATGAATATCACCAATTATATTGCCGATGCAATGATCAAAAACATGGAAAGCAGAATACGAGTGCACTTGCATCGGAACAATGCGTTCATGAAAAGATTCGCCTTTGCACATCTGATTGAGGATTTACTGGGTGAGAAATCAATCAAGC…
Niviventer confucianus ribovirus 1	747	FALSE	FALSE	TRUE	2875	27.9	165	APG79361.1	Hubei orthoptera virus 2	unclassified	Unclassified Riboviria	Unclassified Riboviria	Unclassified Riboviria	RNA	PP211256	GAAGAATCATATTTTTTTGAATAAATGAAATCCTCAAACAGACTGATTGCTATCAAAAATTTAGGCTCTGCATCAGATAACGCCCTTAGGATTCCGACGTCTAATCTGAATGGCTTGGACACACATATGAAACAATCAATCCCAGGTCATTGAGGATGATGTGTGCAGTAGAGAATTACTGTCAACCACTAAGTTGATTCTACGGATCTGTGTCTGTCCTAAGCTTGGGCTTTTGGGTTTTTTTGACAACTCGAGGTACATGCTAGAAAATTTGATGGGCACTAATTCTGGAATGATTGATTATGTACTTGACAAATTCCTCTTGCCAACAAAAAACAAAACTTCAGTTTTGGTGTACAGTCTGCTTAAAAGGTGTTACTTGTCAACTGCATTGGCAAC…
Niviventer confucianus ribovirus 2	3841	FALSE	FALSE	TRUE	2435	29.1	1365	APG79332.1	Hubei myriapoda virus 6	unclassified	Unclassified Riboviria	Unclassified Riboviria	Unclassified Riboviria	RNA	PP211257	AGACCGCTTGGCCTCCGACTTCTGTGGCTGAATTTGCACATGTTGGTGTGGATGCCGAACGGAAAAAGAGAAATAAGGCACAGGTGCAGACAAACCTGGGAAGTGATGGGATCTTGCTTGAACAGGTTAATAAGTTATCATTTGAAGACATACAGAACAAGTCAGTTCCCTATTGGAATCAGACATTTAGAATGGAATGTGATACCTGGTTTAAGGCTGAGTCACAAAACTTTCTTGCACCCTTAAAACATCAACAATACACATATCCTGAACCATGCTACTCAGGTTTGACAGCTGAAGATACCATAAAAAGAGAACAGTATCTAGAAATGAAACCCATTGTTGAAACAATCAGATCCATTAATGGTTACAAATTCATGCGCCAGATATCATTAATGG…
Niviventer confucianus sopolycivirus	380	FALSE	FALSE	TRUE	2194	76.8	125	UXD80120.1	Lasius neglectus virus 1	Sopolycivirus	Polycipiviridae	Picornavirales	Pisuviricota	RNA	PP211258	CATTTTCCTTCAATCTGATGATATTAAAGAAGGAGTTGCTGCTTCTACTACTTTTAAGCTTATTTCTGATAAATTTTTAGATATGTCTCTCCAATATGGAGCTGATGATCCTCTTGGTCAACGTATTTATTATCAGCCTGATTCCCTTAATGATTTGACTCCTGATCTTTTTGACCTTGATATTGAAGCTGAAATTAAGAGAATAATGGATGATTCTGAAGAACAACCAACTTGTGACCAAGAACCGGGTTCTTCTTATGAAGAATCTGTGTATGATGATTCGAGTGAGGATTTTATGCCCTCATCTGATGATGATAGAATTGTTTCTCTTCAAAATTATCTTCAAAATCGCTCTGATATTACTCCTGAACTTCGCCGTC
Niviventer confucianus sopolycivirus	450	FALSE	FALSE	TRUE	2194	66	150	UXD80120.1	Lasius neglectus virus 1	Sopolycivirus	Polycipiviridae	Picornavirales	Pisuviricota	RNA	PP211259	TCCTGAACTTCGCCGTCGTATAACTCTATGTATGCATAAGATTCTTATGCTTGAAGATCTTGATAAAATTGATATTGAGACTATTGGTATTGCGCGTGGTGATGTTGAACCTGAGGTTTTACCTCCTTATCAACCTCGTGGAGATACGCGTTATGAGATGAGTCGACGACAGGCTATTCTTAATAAACATAACAAACAAATTCGTGATCCTAATTATGATAATATGATTCGTGTTGTTGGTAAAGAAGGAAAGAAATACGTTCCTGTCCGTAGTTATTATACTGAATGGACAGGATATTGCTCTAATTCACATCCTGGAGCTAAATTTGAATACTTCCCTCAAGCTAATGAAGTGATGACAACAGATTTAATTCAACGTTTTATTGGCAAAACTATTTC…
Novo Mesto dicistrovirus 1	10017	TRUE	TRUE	FALSE	1971	97.7	1971	UTQ50716.1	Novo Mesto dicistrovirus 1	unclassified	Dicistroviridae	Picornavirales	Pisuviricota	RNA	PP211378	TTAATCCGTACATACAATTGAAGACAGTTTAAGAAATTGAAACCCCTAAATTCGTGGTGAACAGTACATGGGGTATATAAGAGGCGTAATTTCACTAATCGAACTTTTATCAACATTGAAGGAGTCTTTGTTGCGCTGAATTTTCGTAAAATACTTTTCAATTCCGATATTGTTGACGAAACCATTTTAAACTCTATCCTGACCTGATTTGTATAACGACAAAATGCTGATAAACATTTAAAACTTATCAATATATAACGGACTAAGAACCTTAATGTAACCAAAATATAGTTGAGAATCGCTATCCCAATATAAGAGTGAATTCTTTGAGGGCCGTTTTGGCAATGTATTAAGACTTGAGCTTTTAATGACTAGTAATCACTTTACCTGAACATCCCC…
Novo Mesto dicistrovirus 1	1065	FALSE	FALSE	FALSE	1971	98.3	179	UTQ50716.1	Novo Mesto dicistrovirus 1	unclassified	Dicistroviridae	Picornavirales	Pisuviricota	RNA	PP211260	GTCGAAGGTGGAAGATTTTAACAAGTTTCAGCGTAATTTTAAATTTGACATGAAGGATGCAGAGAATGAATTGAGTATAGCTTCCTATGGTGATGATGATGTGATTAATTTTTCGGACAAAGTGTCGGTGTGGTTTAATATGACCACACTAACTTTGGCTTTTGAATTAATTGGTATGACTTACACCGATGAAGCTAAGACTCAAGGAAGTGCACCTGATTGGAAAACTCTTGAAGAAGTATCTTTCTTAAAGAGGCAATTTCGATATGATAACGAGAAGAAAGTATGGGAAGCACCGTTGTCAATGGACACAATACTTGAAATGCCTAATTGGTGTCGAGGAGGACTCGATATCTATGAGGGCACTAAAGTCAATTGTGAAAATGCGATAATGGAGCT…
Nuomin virus	6365	TRUE	TRUE	FALSE	2171	99.9	974	UXX19051.1	Nuomin virus	unclassified	Chuviridae	Jingchuvirales	Negarnaviricota	RNA	PP211379	CGCGTCAACAACTTCAGGACATCCATTGTGCCGAATACATTGCTCAACGTCTACACACGTGCAAGTGGAAACAGCAGAGCTCACTTGACACTCGACACTTCGACTGACCATTACAGGATCAACTACCTACATGTCTACACACACTGTGTCTCACTGTGGGCACTGCCAATGTGGACAGGACAGCAGGGCATCTGTCCACCAAGACTGTGGGCAGTAACCGCGGATTGTGACCACTGTATGGAGCCGATAAGAGAAGAACCCGTAGTTCTGATGACCACATATGTTCCTCCGGTCAGCCTACCGGACAGTTCCGAGTTGGGAGCAAGCGCTCTTGACCAGATACGGACAGAGCTTTCCGCTTTTAATCCAGAAGATTACTATCGACCTGACAACCCGGAT…
Onega tick phlebovirus	6600	TRUE	FALSE	FALSE	2186	97.6	630	UXX19143.1	Onega tick phlebovirus	Phlebovirus	Phenuiviridae	Bunyavirales	Negarnaviricota	RNA	PP211380	TCCTCCTTGCTGAGGACAGATTCAGAGAGCCGGGTCTCCACTCTCCCATTCTATACTGGAAAGTGAAAATCTCACCTTACATCATGACTCACTACAGCCGTTTGGAGACTCTCTCAGACATCCTCCTTGCTGAGGACAGATTCAGAGAGCCGGGTCTCCACTCTCCCATGCTTGATGTTTTCGAGCCAGAAAGATGGGACGTTCAGCCAAAAGTGGTTGCTACGATTGTGGGGAATAGAGACTTGAAGCTTGAGTTCCCTGGTATCCAGGACTGGAGAGGCACTTCCAGGCTCTCTGCCATGTCCCTACAAGACCAGGTTTGGCCACAGGCTAAAATGGCCAACGTGAAGCATGACTACACGGCTGGTTATCTTGCCAGGAGCCTGGATAGACCACTGA…
Orthohantavirus dabieshanense	526	FALSE	FALSE	FALSE	105	97.8	45	QPA20012.1	Orthohantavirus dabieshanense	Orthohantavirus	Hantaviridae	Bunyavirales	Negarnaviricota	RNA	PP211261	CTGAAAAACACGTAGCGGAACGGCCTGGGAAGGCCGACCAGAGACGGTGACAGTCCCGTACGCGAAACGTGAAATAGGCTGTGAGAGGCGTACCAGAGTAGCACGGAGCTCGTGGAACTCCGTGCGAAGCAGGCCGGCCCACCGGCCAAGGCTAAATACTCCTCGATGACCGATAGTGAATCAGTAGGGCGATTGAACGATGAAAAGCACAGCGACGAGCTGAGTTAAAAGTACCTGAAACCGTGCACTTACAAGCGGTCGGAGCACTATGCCCTGTGATAATTCAGCTAAGTTTAGAAGGTTCACAGCTATGTTACATAATGGCTTACCAAACGATAAGCTAAAGAATTGTGTGATCGATGCATTGAAACAAGTGTACAAGACAGATTTTTTTCATGT…
Orthohantavirus hantanense	349	FALSE	FALSE	FALSE	2151	73.6	87	QZA58115.1	Orthohantavirus hantanense	Orthohantavirus	Hantaviridae	Bunyavirales	Negarnaviricota	RNA	PP211262	CGTCTTTTTTCCTTCTTGTTGCTGTTTTGTTTTTTTTGTTGTCTTTTTTGTTGCTTTTGCATAATACTTTGCTGTGGTTTTTTTTTCCTTTGGAGGTGAGAAGAAATTCTTAGCCATTCTTTCTGCTTTGGAGTATGCTTTTAGGTGGGCTTCTGGCGATAGTTTTTTAGAATTGAGTATTCAGTAGTTCATAAGGATGAAAAGGAAATTGTTGTATGTGAGTGCTGATGCAACTAAGTGGTCATCCGGTGATAATTCAGCTAAGATTAGAAGTTTCACAGCTATGTAACAAAAAGACAAACCAAACGATAAGCTAAAGAAAAGTGTGAACGAAGCAAAGAAACAAGAG
Orthohantavirus hantanense	526	FALSE	FALSE	FALSE	2151	94.3	106	QZA58115.1	Orthohantavirus hantanense	Orthohantavirus	Hantaviridae	Bunyavirales	Negarnaviricota	RNA	PP211263	GAATTTGGATACTGTATTAGTTGATGGGGATTCACAATGGGGTGTATCAAAAGTCATGAGTATCGACTTAAATAGATTGCTTGCATTGAATATAGCCTTTGAAAAGACATTAATTGAAACAGCAACTTGGTTACAATATTATACAGAAGATCAAGGGCATTTTCCGCTGCAGCATGAAATACGTTCTGTATTTGCAAAGCATTTTCTGCTGTCTGTATGTCAGAAAATGAAATTATGTGCTATCTTTGATAATCTAAGGTATTTGATACCGGCTGTAACATCTCTATACTCAGGTTTCCCCTCATTAATTGAAAAGCTTTTAGGGTAAGAAGCCCGGCTCGCTGGCGTGGAGCCGGGCGTGGAATGCGAGTGCCTAGTGGGCCACTTTTGGTAAGCAGA…
Orthohantavirus hantanense	482	FALSE	FALSE	FALSE	2151	85.5	76	QZA58115.1	Orthohantavirus hantanense	Orthohantavirus	Hantaviridae	Bunyavirales	Negarnaviricota	RNA	PP211264	TTTTTTGGCTTGGTTTTTTTCTTTTTCTTTTTTTTTTTCTTTTTTTCTTGTTTCACTTCTGGTTCCCTTTGTTTTGACTGTGTTGGATTGTGTTGTTAGAGGCTGGGGGGATTGTGTCATTGACCAGTTTGACTCTTTTGATAAGGAAGCACAGCTGTTGGTACAAATTAAGGGTATTTGCCCAGAAGTTGTAATGCCTGATTCTTTATTTTCTTTCAGACACACCATGGTTCTGCTAAGAAGATTATTTCCTCAGGATTCTGTCTCATCATTCTATTAGGTTTTAATTCTTTTTCATTTTCCATGCTCCGTTTCCGACCTGGGCCGGTTCACCCCTCCTTAGGCAACCTGGTGGTCCCCCGCTCCCGGGAGGTCACCATATTGATGCCGAACTTAGTG…
Orthohantavirus hantanense	412	FALSE	FALSE	FALSE	2151	95.3	43	QZA58115.1	Orthohantavirus hantanense	Orthohantavirus	Hantaviridae	Bunyavirales	Negarnaviricota	RNA	PP211265	AATATACCTAGCCATTAAAATAATGTTTACCGGACTATAAACCTTCTCAATTGACAAACCTCTCGATACCCAGCTTTTTATTAACCTAACTGGCAAGTCGGATCGTAGCCATGTCGTTCTGTGAGCCAAGGAGTTGTTGTCCTCTAAACTGCTGACGTACTGAGAGGCATGGCGACCTTATCAGCATCACTCACTTGTCTTCCTAAGACCGCTTGGCCTCCGACTTGGAGCCAGTTAGGTTAATAAAAAGCTGGGTATCGAGAGGTTTGTCAATTGAGAAGGTTTATAGTCCGGTAAACATTATTTTAATGGCTAGGTATATTTCTAAAACATTTAATTTAACTAATAACAAGTTTCACTACTGGATCCCTATGATTTGACAGAGTTGGAAAGTGTTGT…
Orthohantavirus hantanense	368	FALSE	FALSE	FALSE	2151	100	46	QZA58115.1	Orthohantavirus hantanense	Orthohantavirus	Hantaviridae	Bunyavirales	Negarnaviricota	RNA	PP211266	CCCAGCAATAGTATGTGTTCATGGAGATTAAACATACTCTTCCACATCTCTGTATTCACACTGAACCAATGGAGATTACCAGCTTGTATCTGTTGAAAGTCGGAGGCCAAGCGGTCTTAGGAAGACAAGTGAGTGATGCTGATAAGGTCGCCATGCCTCTCAGTACGTCAGCAGTTTAGAGGACAACAACTCCTTGGCTCACAGAACGACATGGCTACGATCCGACTTGGTATTTAGAGCCTGTAGATGATGGGACGGATTGGTTTTTGTATGTTTCTCAACAGATACAAGCTGGTAATCTCCATTGGTTCAGTGTGAATACAGAGATGTGGAAGAGTATGTTTAATCTCCATGAACACATACTATTG
Orthohantavirus hantanense	445	FALSE	FALSE	FALSE	2151	97.8	46	QZA58115.1	Orthohantavirus hantanense	Orthohantavirus	Hantaviridae	Bunyavirales	Negarnaviricota	RNA	PP211267	TTGCTGCTTTTGTGCTTTTTTTTGTCCTTGTTTCTTTTTCTCTGGTGGTTGCTTTTTGTTTTCTTTTTTTGTTTTGGGTTGTTCCTTTTTTTTGCCTGTCTTGTTTTTTTTGTTTTTTGGGTTTGTCTGGTCTTGTTCTTGTTGTTGGGCTTTTTTCTTCTTCTGTTTCTTTCTTTGAGGCCTTCCGGTTTTTTTCTAACTCCCGACTTATTCCTAGTTTTTTGAAGTTTTATGAAGAGACAAGAGAGCATAAGGCAATGGCTAGGATTGTTAGAAAGTACCAGCGTACTGAGGCTGATCGTGGTTTTTTTTATTACAACATTACCTACTAGATGCAGATTAGAAATAATTGAAGACTATTATGATGCAATAGCAAAAAACATTGCTGAGGAATATATA…
Pigeon torque teno virus	476	FALSE	FALSE	FALSE	156	80.6	108	UQF10862.1	Pigeon torque teno virus	unclassified	Anelloviridae	Unclassified	Unclassified	DNA	PP211324	GACAGGTGCAAGGCAGGCTTCCCGAACTACACAACGCAGACACTGGCTGGAGCTGCCCTGCCCGGCACACGCTGACGTCGCACTGTAAAATTCCCTGGGCCCTTTACCCGCGCCAAGGGGACGGCTCCTGGACGGCCCTTGCCCTTATCAGAACTAAAGCCCCCGTCCCTGCGACTCCCAGCCCCTGGCCAGCCCTCGTGCCTCCACTTAGCTTTCAGAGGGCCAAGGGACCGAATCCATCTTCAACGGATGAAAACGCCACGTGCGCGAACGGCCGTCATCCTGCATCGCCGGGTTCCTCTTCAGCGTCTGCAGGAACACCTAGGAAACAGAAACGACCAAGCTCAGCGAGAAGCACACGGCACAGCTTCCCTCTGGCGCCACGCAACGACCCACCTG…
Pigeon torque teno virus	541	FALSE	FALSE	FALSE	156	80.2	91	UQF10862.1	Pigeon torque teno virus	unclassified	Anelloviridae	Unclassified	Unclassified	DNA	PP211325	GACGGCGGCGCTGGCGCAAACACACAGAGACGGCGGCACTGGCGCAAACACACAGAGACGGCGCAAATACGAGAAGCTGCTGCAAGACTAAGAACTTCTTCCCAGCATCTTGAAGTGCCAGTCCCTTGGACTGGATGGGTAGAGAGCAGAGCTGCTGATGATGCAGCCCAGAACAAGACCATAAATCACAACTGACCGGAAACATCCCAAATGCAAACACCATCCACACTTTTGGCTGATAACACAAGAATCCAGGACCCAATTGGCACCAAGCCAATTGGCACTGGCATTCCAGATCCCGGGATGGCACCTGAGATGCACATTGTGCCCCTTGAGCACAACGAGACCCCAGGATCGTCTGACAGGCGCAAGGCAGGCTTCCCGAACTACACAAGGCAG…
Porcine picobirnavirus	1709	TRUE	FALSE	FALSE	562	87.7	562	UAW00443.1	Porcine picobirnavirus	Picobirnavirus	Picobirnaviridae	Durnavirales	Pisuviricota	RNA	PP211381	AAATTTCAGAAAGGAGAATTCTTATGGAGAAATCTAAAAGAAATCTTAAGACACAGTCAGTCTCTAAAACTATTAACTTCAGGTCGTTTCCATCTGAAGTTTCTTATCTTGTGGAAAACAATAATAGTTTGAAACAAGCTCTAAACCGATTGGAAGGAGGCACGCAGGATACTCCCCGATCATGGTTTTATGAGCACGAAGACCCAATCTGGATTCTTAATCAGGTGCGTGCTAAGCTAATTGGCATGAAGGACCTGAAAATTATTTCTGATTGGGACTTGTCTAAATCTGACAAGTATGCTCCTCAAGGGGGAAGTGCGCCGTTGTCCGATAGACTTGAAACACTGGAGGAATACTTTCTACACCTTACACGTCCAGTGATTATTGATGACGTCTGTT…
Rabovirus A	7242	TRUE	TRUE	FALSE	2333	94.2	2335	AWK02684.1	Rabovirus A	Rabovirus	Picornaviridae	Picornavirales	Pisuviricota	RNA	PP211382	GGCCTAAGGATGTCCTGCAGGTACCTTTAGATAACCTTAAGAGACTATTGATCTGAGCAGGAGCCAAGGTGGTCTTTCCCAGCCTTGGTTAAAAAACGTCTAAGCCGCGGCAGGGGGCGGGAGGCCCCCTTTCCTCCCAAAACTTAACATTGATTGTATGGTGACAACTGAAAGACATAACACAATGGCTTTCCAGTTTGTTTCCGTACGATCCTCTGAGTGCTACATTCTAAAGACAAACCATCAATCTATCATGTATTGGGTATCCATCATAAATAACAATGGTAAACTTGTTGCTGTCATCAATCTGTCTAGACGGAGAAGCGTCAACCAAAAAGCTAGACAGACTGGTGCCAATGTGTCAAAACCATCATCTGGCAATATACCAATGGGAAATCA…
Rabovirus A	1712	FALSE	FALSE	FALSE	2337	98.8	570	QNJ99370.1	Rabovirus A	Rabovirus	Picornaviridae	Picornavirales	Pisuviricota	RNA	PP211268	AACACAAAGAGTTCTCAAACCTCCAGTTCCAAGAACAGTAGTTACTCAGGGCCCAGATTATGATTTTGCAACATCTCTACACAAAAAGAGCCTGTTCCCAGTGAGATGCATAAATGGCCCATTCACAGCTTTAGGTCTAAAAGGTAAATGGCTGGTCCTGCCTAGACACTGTGTTGTGGGAGAAGAGATCACTCTGTGTGAACAGGAGTTCAAGGTTCTAGATAATGTAGAGCTTGAATGCAAGGAAGGGAAACTAGAGCTCAGGTGTGTAAAAATTGATAGACCCATCAATTTCCCTGATGTGACAAAGAGGATCCCAAAGAAATTTGTGGAAACACCAGATTGCATTCTGTGCATTAATAGTGAGAAATACCCCACAATGACATGCCCAGTTGGAAA…
Rabovirus A	7153	TRUE	TRUE	FALSE	2333	94.3	2324	AWK02684.1	Rabovirus A	Rabovirus	Picornaviridae	Picornavirales	Pisuviricota	RNA	PP211383	GGCCTAAGGATGTCCTGCAGGTACCTTTAGATAACCTTAAGAGACTATTGATCTGAGCAGGAGCCAAGGTGGTCTTTCCCAGCCTTGGTTAAAAAACGTCTAAGCCGCGGCAGGGGGCGGGAGGCCCCCTTTCCTCCCAAACTTTATAATAGATTGTATGGTGACAACTGAAAGACATAGCACAATGGCTTTCCAGTTTGTCTCCGTGCGATCCTCTGAATGCTACATCCTTAAAACCAACCATCAATCCATCATGTATTGGATTTCCATTATCAACAATAATGGAAAAATTGTTGCCGTCATCAATCTATCTAGACAAAGAAGAGTCAACCAAAAAGCTAGACAGACTGGTGCAAACGTATCTAAACCTTCATCAGGCAACATACCAATGGGGAACCA…
Rabovirus A	3172	FALSE	FALSE	FALSE	2337	98.3	1057	QNJ99370.1	Rabovirus A	Rabovirus	Picornaviridae	Picornavirales	Pisuviricota	RNA	PP211269	TCCAGATGACAAGATCCAGAAAGTCATTGCAGAAATGAAGAATCTTAAGAAAGCAGCAGATTATTATGGATTAAAGGAAAATTCCTTTGCTACCAGACAGATCATCCATTATTACAAAATTGCATGTGATCTGGAGAAAGGCATAACTAAGAACAGAGTAGAACCAGTGGCTCTGTGTGTTCATGGCGGCCCCGGGTCAGGGAAGTCCCTAGCAACTCAAATGCTTGGAAGAGTGATTTGTCAGCACTATTGTGGAAAACCATATTGCCTCCCACCTGACCCAAAGCATTTTGATGGGTATGATGGTCAACCAGTGGTCATCATGGATGATATCTGTCAGAACCCTGATGGTGAGGACATGAAGCTCTTCTGTCAAATGGTATCATCTACAGAATTTAT…
Rabovirus A	7682	TRUE	TRUE	FALSE	2337	94.8	2316	QNJ99370.1	Rabovirus A	Rabovirus	Picornaviridae	Picornavirales	Pisuviricota	RNA	PP211384	CCGGGTATTAACGTACCCGGAGTTTGACAGGGTGTTCCAACCTGTCCTGGCCATGCATTCATTTACGAATGTTTGTATGACCCGCTTTCTAATACCCCACAACCCCTTTGTAACCACAAGCTTTACTCAGGCTAGTAGCCCGACTAGCTGTGTGAACAAGAGGCTAGGGCATATACCAACAACACCGACCCCACTGGTCGAAGGCCGCTTGGCAATAAGACCGGTGGAACAAGGTCGCCTGTAGTTGCTTGGAATCATATCTTCTAATGACTTATGTCAGCGGTGCTACTCACACCGTAATTCTTCTACCCTATCCCCACGCTTGTGGAACTAGGAGGGGATGAGTGATTCAAGTAAGTACTGTCAGAATGGTGAAAATAATCTGATTCTGAAACACAA…
Rat astrovirus Rn/S510/Guangzhou	930	FALSE	FALSE	FALSE	516	94.8	309	AVE17138.1	Rat astrovirus Rn/S510/Guangzhou	unclassified	Astroviridae	Stellavirales	Pisuviricota	RNA	PP211270	GGTTCCAAATGATTACCCACTAGTTGGGGTTGTGCCTATGAATCGGCCAATCTGTGATTTTGATGAACCAGTTGACCCCCACCTTGGAGTCCTCCCTCCACCGCCTAAAGTACAACAACTTGAAGATTATGGACCTACAATTTGGGATGAAAGTGCATATTTGAAATCTTTTGAAAAATTTTATTATGCAGAGCCTTCAAACTTTTTCCAGGACTACCCAGAGTTGTGTGCGTTCGCAGACGCAGCCTTCAGGAAGCACTTTTCCTTTCTCCAGGACACAAGAGTGGTGCATATTACTGCCACCGAAAAGAATTTAGGCTCCTGTCCAGCCTATCCAAAGCTCTGCTGGTTCTCATCAGAGAGAGAATTTTTAGAAGAACAGATGTGGGCTCCCTACAT…
Rat astrovirus Rn/S510/Guangzhou	1931	FALSE	FALSE	FALSE	516	96.7	510	AVE17138.1	Rat astrovirus Rn/S510/Guangzhou	unclassified	Astroviridae	Stellavirales	Pisuviricota	RNA	PP211271	GTTCGTGCTGCCATAGGTAGGGAGTTTGCAGTCCTGCGTGATGAGCTGGCCTATGGGCAGGCTAAAGGGAAAACAAAACATGGCCGTGGCTTTAGGCATAATCCTAGGACTTTCAATCGACCTGTCCCAGTGAAAGGGGGAAAAAGAAGCGCAAAGTCTTTACTGAGCAGGAATATAAGGAACTGCTGGAAGCTGGCCTTGATGCTGAAAAGATCAGAGAGTTAGTGGATGAGATCTTGGCTCGTGAGGCTGAGGAGGTCGGCTATCCTGAGTGGTCTGATCCTGATGAGGATCAGGATGAAGAGCTTGAGGATGAATGGTTTGGACGCTATAATGAAAATGAAACAGAGCAAGTTCCTGAAAGTGCCGATGCCGAGCAATCCCAGCAGCAACAGCAGC…
Rattus norvegicus associated picobirnavirus 1	1549	TRUE	FALSE	TRUE	524	75.3	510	AVX53292.1	Marmot picobirnavirus	Picobirnavirus	Picobirnaviridae	Durnavirales	Pisuviricota	RNA	PP211385	ATTTATTTGAAAGGAGGTAAGCTTATGATTACGAAGCTACCACAAGAGTTCTTGTCCGTTATCTCTGAAAACAACGGTCTCCAAGTGTACCTATCTAATCTATCCAAGGGTAGGGATTACACACCACGTTCTTGGTTATACGAGAACGAAAGTCCGGATCAAGTGTTGCAGAACTGGTTAAACCAACTCTCTGTCCTTGAGAATGGCGACACCTTCGAGAAGGAGGTATTCCAGTTCGACACTTCTCAGCTCAAGAAGTGGGGTCCCCAGGGCGGAATTGCTCCAATCAAAGATCTGCTAGCTGATGTAGTTGAGCCGACTTTTGCTGACGCTGATTCACCTCGGCCGAAGGCTTTTACTACTAAGGCTTGGGAGCAAGCTAAGCGTTTTGTGGTTCAG…
Rattus norvegicus associated picobirnavirus 1	1608	TRUE	TRUE	TRUE	524	68.5	524	AVX53292.1	Marmot picobirnavirus	Picobirnavirus	Picobirnaviridae	Durnavirales	Pisuviricota	RNA	PP211386	CTAAATTTTATGAAAGGAGGTACTTCGGATGATTACGAAGCTACCAAAAGAATTTAATGAGACCATTTCTCGCAATAATGGACTCAAGATGTACCTGTCTAATCTTAACAAAGGACGGGACTTTACGCCAAGATCCTGGCTATACGAGGATCAAGAACCAGATAAAATTCTCAGCGACTGGTTAAATCACCTTTCTCGTCTGGAGACCGGAGATACTTTCGAGAAGAAAGTGTTCCAATTCGACACTTCCCAGATGAAGAAGTGGGGACCCCAAGGCGGAATCAGACCGATTTCAGAGCTCATGGATGAAATTGTTTTGCCTACCTTCTCAAGCGCTGATTCTCCTCAGCCAGAGGCGTTCGAGAGTAAGACATGGACTTTGGCCCAAAGAAACGTGGT…
Rattus norvegicus associated picobirnavirus 1	1607	TRUE	FALSE	TRUE	524	74.8	524	AVX53292.1	Marmot picobirnavirus	Picobirnavirus	Picobirnaviridae	Durnavirales	Pisuviricota	RNA	PP211387	AATTTATTTGAAAGGAGGTACGCTTATGATTACGAAGCTACCAGAAGAGTTCTTGTCCGTTATCTCTGAAAACAACGGTCTCAAACAGTACCTGTCTAGTCTAGCTAAAGGTAGACAGTACACACCTCGTTCTTGGCTATACGAGGACGAAGATCCGGATCAAGTGTTGCAGAACTGGCTTAACCAGTTGTCTGTCCTTGAGCACGGTGATACCTTCGAGAAGAAGGTGTTCCAATTCGACACTTCTCAGCTCAAGAAGTGGGGACCCCAGGGTGGGATAGCTCCAATTCAGGAGTTACTACCTGACGTAGTGAAGCCTACTTTTGCTAGCGCCGATTCACTCCGGCCGAAGGCTTTTGCTACAAAGCAGTGGGAACGAGCAAAAACTTACGTTACGCA…
Rattus norvegicus associated picobirnavirus 1	1578	TRUE	FALSE	TRUE	524	73.3	509	AVX53292.1	Marmot picobirnavirus	Picobirnavirus	Picobirnaviridae	Durnavirales	Pisuviricota	RNA	PP211388	TTTTCTGTTTTACTACAAATTTCTTGAAAGGAGGTACGCTTATGATTAAGAAGCTACCTAAAGAGTTCTTGTCCATTATTACTTCAAATAATGGTCTCAAACAGTACCTGTCTAATCTAGCCAAGGGTAGACCATTCACTCAGAGGTCTTGGTTATACGAAGACAGAGAGCCGGATAAAGTTCTAGAGGATTGGTTGAAAATCCTGTCTAAACTTGAGCACGGCGATACCTTCGAGCAGAAGGTATACCAATTCGACACTTCTCAACTTAAGAAGTGGGGACCCCAAGGCGGGATAGCTCCTATCTCAGAGTTACTGGAGGAAGTCGTAATGCCAACTTTTCGTTCGGGCACCTCTCCACGTCCGAAGGCATTCGACTCACCCGAATGGAAAAGTGCGG…
Rattus norvegicus associated picobirnavirus 10	991	FALSE	FALSE	TRUE	532	79.6	329	UAW00571.1	Porcine picobirnavirus	Picobirnavirus	Picobirnaviridae	Durnavirales	Pisuviricota	RNA	PP211272	CCATACTTCTCCAAGAGGCGAAATGTAACAGACGAGACAATGCCTGTGACGGTAGACTGGTACGAGCATGCAGTAACGCAAATCCTTAGTGGTGAATCATGGAAAGCGTGTGCTGTACTTGGATGGAGAGGACAGGAAGGCGGTTATTCCAAAGAGGATGTGAAACAGCGTGTGGTTTGGATGTTTCCATATGCAGTTAACATCTGTGAGTTACGTGTATATCAACCATTAATTGAAGCCGCGCAAAGATTCAATATTGTTCCAGCTTGGGTGAGCATGGAATCGGTTGATAAGAGGATTACGCAAATGTTTGATACCAAGAGCGAATCTGATTTAGTAGTCTGCACGGACTTTAGTAAATTTGACCAGCACTTCAATCAACAGCTACAGACCGCCGCA…
Rattus norvegicus associated picobirnavirus 10	1025	FALSE	FALSE	TRUE	547	64.6	345	UAW00576.1	Porcine picobirnavirus	Picobirnavirus	Picobirnaviridae	Durnavirales	Pisuviricota	RNA	PP211273	TTCAGAGCTTTTGGAGTCATGGAACAGAGTCCTCGTGTCAATTCGAGAACGATGGCCTTCTCTGTATGAGTTTGAGGAGGACATGGCCACAAAAGTCGGTCCACTATCAGTCATGAAACCTTTACAGGAAAGGCTGCCTGATGTGAGATCTTACTACGACGATATTCTCCTATCGTCAAACTCCGTTCTCTACTCTGCAGTAGCGGCAGTTAGAAGGGAATGGAGCCCTGCTCGTGGTATGCAGGTTAGGACACAACAGAGGACAGTTGAGTTGATGAAGAAGTCAACTAACTCCGGATCCCCGTACTTTACCAAGCGTAGAAACGTTGTTGAGAAAACAGTGCCCGCAAGTATCAGACAACGAAACACGATGGGTCCCACGCAATTCCTTCCTGGTTT…
Rattus norvegicus associated picobirnavirus 11	1726	TRUE	FALSE	TRUE	531	69.4	532	ANS53886.1	Picobirnavirus wolf/PRT/1109/2015	Picobirnavirus	Picobirnaviridae	Durnavirales	Pisuviricota	RNA	PP211389	CATACTTAAGCGTTCTGCTTAAGTTCATTTTCCACTTTATTTAAGTTTTACCTTTCAACTTTAGCGAAACGCTTAAAGAAAGGAGGTTATCGTTATGCCTAGAAATAACGAAACAGCGGTATCTTACTTCACACAAGAAGGTGCCTCAAGCGCTCGGACGTACTTCGGCAGAGTCGTCAAAGGGCAAAGCAAAGTGTTTGACACTCCTTTCGCCAAGGGAGAGTCCACTGAAAACATGCTGGCAACATGGGCTAGAACTCTTGAGTCGATTGGCGACAGGTGGCCTTCGTTGCTTGCATTTGAAAATGACCTAAGAGCAAAGGTCGGACCAATGTCGGTCATGAAGCCTCTAAAAGAGAGGTTAGTAGACATTGATCATTACTATGAAGATATTCTCCT…
Rattus norvegicus associated picobirnavirus 12	981	FALSE	FALSE	TRUE	525	72.5	320	AVX53274.1	Marmot picobirnavirus	Picobirnavirus	Picobirnaviridae	Durnavirales	Pisuviricota	RNA	PP211274	ATTTAGAAAGGAGGTACGCTTATGATAAAAGCGCTACCGAAAGAATTTCAAGAAGTCATTTCTTCTAACGACAATTTGTATCGGTACTTACTTAATCTAGGTATCGAGCAGCCATCTACGAAACGATCATGGTTGTATGAATGGATCGATGATCCCGACTCTATTCTAGATATGTGGTTGGAAACACTATCGAAGCTCGAGAAAGGCGACACCTTCGAGCAAAATGTATTCCAGTTCGACATTTCGCAGAAAGAGAAATGGGGACCTCAGGGCGGTCACGCGTCACTAAAAGATCTATATCCGACTGTTATTGAGCCAATGTTTGCGGAGCATTCCCCTGCTCCGGCCTTTAGCACGAAGATGTGGCGCGACTCCATGGATGTAGTCGTAGCGCAGCTA…
Rattus norvegicus associated picobirnavirus 13	1612	TRUE	TRUE	TRUE	535	72.1	534	AVX53276.1	Marmot picobirnavirus	Picobirnavirus	Picobirnaviridae	Durnavirales	Pisuviricota	RNA	PP211390	GCCATCATTATGCCTAAAAATAATGAAACTAAGTATTTTGAAAGTTCATTTCAACTACCAAACCCTGGCTTACGGTCATATTTTGGCAATGTCGCGAAAGGACAGTCCGAAATCTATGATACTCCGTTCGCCAAAGGAGAATCAACTTCAGATTTATTGAAGAGATGGAGCGCTATCCTCGAGTCAATCGCGGATAAGTGGCCGTCCCTTTATGAATTTGAGAATGACCTGAGGAACAAGGTCGGTCCAATGTCAGTCATGCGACCGCTGAAAGAGAGAATGTCAGACATTGAATCTTACTATGAAGGGATTTCACTACCTTCAGAACCAATCAGACAGAGTGCAGTAGCAGCCTCATTGTCTGAATGGAAGTCTGTTTCCGGCTTACGAGTAAGAAAT…
Rattus norvegicus associated picobirnavirus 14	1649	TRUE	TRUE	TRUE	514	79.4	514	AVX53289.1	Marmot picobirnavirus	Picobirnavirus	Picobirnaviridae	Durnavirales	Pisuviricota	RNA	PP211391	TTTTCTGAACACTTCTTGTTCATCAAAATTCCAATCTTTAAGAAATCTTCAGTAAAGAATTTACAGTACAATTCTTAACTGAAGGAGGTTTAGCTATGAAAATTGAAAAAGCTGAACGTGCTATGATTGACACTATTCAATCAAATAATGGATTGCGCCTTTACTTGGAAAATCTTAGTAGGGGTCGACAGATGACACCTCACTCGTGGTTATATGAGAAAGAGGATTCACAGAAAACGCTGGAGCGTTGGATTCCTATTATGGAGTCGGCCAATAATAGGACTTCCTTTGGAGCAGAATTCAACAGTTTCGACCTTAAGCAAGTCGAGAAATTCGGGCCACAAGGAGGCATTCCGCCTATCGATTCACCAGAAGTTTGGGACGTATTAGAGCCACTGT…
Rattus norvegicus associated picobirnavirus 15	1551	TRUE	TRUE	TRUE	534	72.9	516	AVX53300.1	Marmot picobirnavirus	Picobirnavirus	Picobirnaviridae	Durnavirales	Pisuviricota	RNA	PP211392	ATAAAATATGAAAGGAGGTACGCCTTATGATTAAAGGGCTATCGAAAGAAATTCAAAGAATTATTTCACAGAATGAAAACTTGAGTAGATACTTGTTTAGTCTTACTCAAGAGCAACCCAGTACACAGAGATCCTGGTTGTATGAAAATAAGGATCCGCAGGAAATTCTCGAAAACTGGAAAAATCATCTCTACTCTCTTGAGACGGGTAATTCCTTCGAAAGAGAAGTATTCCAGTTCGACATTTCGCAAGAAGAGAAATGGGGACCTCAGGGCGGTCACGCTCCGATTTCGGAATTGATGAAGGACATAGTTCTGCCGAGCTTTGAGAAGTCAAAACCAAATCCTAGCGCATTCACTCTAACCGCTGCAAAACCTGATTGGTTAGCAGCGTGTAATA…
Rattus norvegicus associated picobirnavirus 16	1686	TRUE	TRUE	TRUE	523	60.7	535	QXV86708.1	Picobirnavirus sp.	Picobirnavirus	Picobirnaviridae	Durnavirales	Pisuviricota	RNA	PP211393	TCATTTTATTCTATGAAAGGAGGTACGCTTATGAAAATTGTTAAGCTACCGGAATCAATGCAACAAGTCATTCGACAGAATGACCCACTTGGTTTGTACCTAGACAATCTTGTTAAAGGTAAGAAGCCAACAGAACGTTCCTGGCTATATGAGGATCTACAGCCAGACACTATCCTAGAGAATTGGTTACGTCATCTCGAGCCTTTATCTCATGGCTCTCCGTATGAGGTAGAAGTATTCCAGTTCGACACTTCGCAGCTTGAGAAGTGGGGACCCCAAGGCGGAGTAAAGCCTATCTCTGAAATTTTGGATGTTGTTGAAGCGGGCTTTAAGATGGCTGATTCTCCGCAGCCATCTGCTTTTAAGACACCAGAATGGAAGAGAGCACTGTCCGACACT…
Rattus norvegicus associated picobirnavirus 17	1671	TRUE	TRUE	TRUE	505	51.3	503	USE08258.1	Picobirnavirus sp.	Picobirnavirus	Picobirnaviridae	Durnavirales	Pisuviricota	RNA	PP211394	CTCGAACCCGACGAGATCCTTAAGCGCTGGCTATCAAAGCTGAGATCCCTGGAAAATGGGGATTCCTTTGACAAGAATGTGTTCCAGTTTGATTCTGGTCAGCTCCAGAAGTGGGGTCCTCAAGGCGGTGTTCCACCGATCGAAGACATTTTAGAGGAAATAGTCTATCCTAGTTTCTCCGCTAGTGAAAAGATCCCTGAAGCATTTTCCGATGCTGCCTGGACGCAAGCAAAGCGTCAAGTGGAGCGTAAGCTACACTCATCAGGGTGTAAAGGATTAAGCCCAGTCCCCTATAAGCGCGTAGTTGACGACATGTGTGCGAGAGATACTCTCGAATCTAATTCAGGGTGGCCCTTATTTACCAGAAGGAACAAACCTGAAGTCGTTATACAGTCTTGC…
Rattus norvegicus associated picobirnavirus 18	1610	TRUE	FALSE	TRUE	532	77.8	532	AVA30701.1	Picobirnavirus sp.	Picobirnavirus	Picobirnaviridae	Durnavirales	Pisuviricota	RNA	PP211395	CATTTATGAAAGGAGGTTACATTATGCCTAAAAATAATGTAAGTAGATTTTCGGACTACTTTAAGTTACCGAATCAAGGTCTAAGGACGTATTTTGGCAACGTCGTTAAAGGCCAACCGAATGTTTATGACACGCCATTCGCTAAAGGCGAGTCAACTGAGACTATGTTAAGACTCTGGAATAAGGAGCTTGTATCGATTAGCGACAAGTGGCCTTCTCTTTATGAGTATGAAAAGGACATGGCCTCTAAAGTCGGCCCAATGTCAGTAGTAGCACCACTTAAAGACCGCTTGGTCGACATTGAGTCTTACTATGAAGGTATTCACCTACCTTCAAAGCCACTTCTGGAATCGGCAATAAAAGCAACCATTGCAGAGTGGTCTCCAGCAAGAGGACTGG…
Rattus norvegicus associated picobirnavirus 19	1669	TRUE	FALSE	TRUE	541	69.2	539	QDY92374.1	Pink-eared duck picobirnavirus	unclassified	Picobirnaviridae	Durnavirales	Pisuviricota	RNA	PP211396	ATGAAATTTTACAAATTTTATGAAAGGAGGTTTCACTTCATGAAAGAGAAGGAAACCAAGTTGTCGGCATACTTCGAACTGCCGAATCAAGGCTTGCGGGCCTATCTCGATCGGGTGGCAAAAGGCCAACCTGACGAGTACCGCACAACATTCTACAAGGGAAAGGAGCTTAACGAGATTCTAAGTGGTTGGGATGACATTCTGCGTTCTATTGCCACCAAGTGGCCCTCACTTTACGAATTCGAAAGTGACCTGGCTAAGAAGGTCGGACCTATGTCCATCATGAAACCGCTTGATCAGCGCATGGAGGATATTCGTTCTTACTATGATCTTATCTCCTTAGATCAGACGCCGATTCCGCCCGAAGCGTTGAACCGTGCTTTGGATGAATGGCGCAAG…
Rattus norvegicus associated picobirnavirus 2	1550	TRUE	FALSE	TRUE	538	78.1	512	QXV86683.1	Picobirnavirus sp.	Picobirnavirus	Picobirnaviridae	Durnavirales	Pisuviricota	RNA	PP211397	AATATTTATTGAAAGGAGGTTACTGTATGCCTAAAAATACAGATACTAAGATGGAATTGTATTTTCAATTACCAAATCCAGGACTACGCTCTTATTTTGGCAATGTTGTTAAAGGTCAAAGTGAAGTGTATGATACGCCTTTCGCTAAGGGTGAATCAACTAAGTCCTTAATTAGCGCATGGAATGAGACCCTTGTATCAATTAACGACAAGTGGCCTTCGCTTTATGAATTTGAAACCGATATGGCTAGCAAGATCGGACCTTTAAGTGTGCGTCTACCGCTTGAGCAACGGTTGGATGACATTAAAGCGTATTACGAAGGTATTCACCTACCGAGTGCGCCCATAATGGACAGGGCCATTAAAGCAACTATTGCTGAGTGGGCTAAAGCTAGCACCA…
Rattus norvegicus associated picobirnavirus 2	1663	TRUE	FALSE	TRUE	538	75.3	538	QXV86683.1	Picobirnavirus sp.	Picobirnavirus	Picobirnaviridae	Durnavirales	Pisuviricota	RNA	PP211398	TAATAATTTTATGAAAGGAGGTCACAGTATGCCTAAAAGTACTGATACTAGTTTTAGTAATTACTTTAAATTACCAAATCCGGGACTACGCTCGTATTTTGGCAATGTCGTTAAAGGCCAAAGTGAAGTGTATGATACACCTTTCGCTAAGGGTGAGTCAACTAAGTCCTTAATTAGCGCATGGAACGAGGTTCTATTGTCGATTAGCGACAAGTGGCCTACGTTGTATGAATTTGAAACCGACATGGCTGGAAAGGTCGGCCCTCTGAGTGTCATGCTACCATTGCGTGAACGGATGCAGGACATCGAGGCGTATTACGAAGGTATTCACCTACCAAGTGCACCCATCAAACTTCAGGCCATCAAAGCAGTTGAGTCTGAATGGGGAAGAGCCAGCAC…
Rattus norvegicus associated picobirnavirus 2	718	FALSE	FALSE	TRUE	538	68.8	240	QXV86683.1	Picobirnavirus sp.	Picobirnavirus	Picobirnaviridae	Durnavirales	Pisuviricota	RNA	PP211275	CCAATATCAAGAGCTGCTACTAGAGCCGTAGTGGCAGAGTGGAACACAGGAAGCACACCAAGGCTCAGGTCACAGATCGAAACCGTGCGTGGAATGCGTCTCTCCACTAATTCAGGCAGCCCATACTTCACAAAACGAAGGAACGTTCTGCAAAATACTGTCGGAACTGATATCTCAATCATCAAGGATTGGGTAGAGGCTGAAATGCCAGATGGACAATATCGACAGTGCGCGATTTTAGGCTGGCGCGGACAAGAAGGTGGCCACTCAAAAGAGGACGTGAAACAAAGGGTTGTTTGGATGTTCCCCTTCGGAGTAAACCTCTGCGAGTTACAAGTCTATCAACCCGGTATTGAGCTTGCGCAAAAGCGCGGCATCGTACCTGCTTGGATTGGCAAT…
Rattus norvegicus associated picobirnavirus 20	1710	TRUE	TRUE	TRUE	532	75.3	527	QXV86671.1	Picobirnavirus sp.	Picobirnavirus	Picobirnaviridae	Durnavirales	Pisuviricota	RNA	PP211399	GTTTTATACTATTTAGAAAGGAGGTTACTAGTATGCCTAAAAGTAAAGATACTAGAAATCAAACTGTGAAAGCTAAAGGTAAACCTGCAGCTACACAGATGGATAGCTATTTTAAGCTACCGAACCAAGGTCTACGCTCATACTTTGGCAATGTTGTTAAAGGTCAAAGTGAAGTGTACGACACACCTTTCGCTAAGGGTGAGTCAACTAAAGATCTAATTAGCGCATGGAATGAGACCCTTGTATCAATTAACGACAAGTGGCCTTCATTGTATGAATTTGAAATGGACATGGCTGGCAAAGTCGGACCGCTCAGTGTCATGCTCCCATTGGAGGAAAGAATGGGTGACATTGAAGCCTATTACAAAGGCATTCACCTGCCGAGCCAACCACTCGATA…
Rattus norvegicus associated picobirnavirus 21	1358	FALSE	FALSE	TRUE	535	75	452	QXV86676.1	Picobirnavirus sp.	Picobirnavirus	Picobirnaviridae	Durnavirales	Pisuviricota	RNA	PP211276	CCATTATCTGTGATGGAACCTTGGAGCAAAAGAATCATAGATGTTGAGTCTTACTACGACGGTATTCTCCTTCCGTCGAAACCGATTAGTGAAAGCGCAATCGCAAGCGTGATCAATGATTGGGCGAAGGTCAAGGGACTTCGTATCAGAGGTATTGAACGGACAATGGACTTAATGAAGAAGTCAACTAACTCCGGATCTCCATACTTCACCAAACGTAAAGCTGTGGTAAAAGAAACACTCAAAAATGTAGTGTTTACGTTAAACCACAAAACCTATTTCCAAAACACCTCTGAAGGAAGGAAAGAGGTATTAGCAATCATTGGTTGGAGAGGCCAGGAGGGCGGTCCGCAGCCCAAGGATGTAAAACAGCGGGTGGTTTGGATGTTTCCATTCCGG…
Rattus norvegicus associated picobirnavirus 22	1705	TRUE	FALSE	TRUE	533	72.3	535	UBJ26023.1	Rodent associated picobirnavirus	unclassified	Picobirnaviridae	Durnavirales	Pisuviricota	RNA	PP211400	ATAAAAATTTACAACAAATCTTATGAAAGGAGTTATTTCAAAACTAAGAAAGGAGGTTACGTTATGCCTAAAAATAACGAAAATAAAGAATTCGAACGTTGTTTCGAACATCCAGCAAATTTAGGGTCTTATTTTGGCAATGTTGTCAATGGACAGCCTAAAGACTGGAAAACACCATTCGCCAAAGGTGTTTCAACTAAGGAGTTACTTAGCAGTTGGAGGAAAGTCCTCGTGTCAATTGGCGACACGTGGCCTTCACTGTTGGAGTATGAAGATGACCTCGCTAAGAAGGTCGGCCCAATGTCGATTGAGTTACCGCTCGAGGAACGTATGTCTGACATTGAGTCTTACTATGATGGTATTCTCCTTCCATCTAAACCCATTGATGATAGTGCGATC…
Rattus norvegicus associated picobirnavirus 23	1756	TRUE	FALSE	TRUE	536	77.9	535	QXV86689.1	Picobirnavirus sp.	Picobirnavirus	Picobirnaviridae	Durnavirales	Pisuviricota	RNA	PP211401	TTCTTTTACAATCTAATTTATTCAATGACTACATTCTTCGTAGTCGAAAATTTCCAAGTTTTATTCCTTTTCTTCACTTTGAATGTAGAAGTTGAAAGAAAGGAGGCACACATTATGCCTAAAATTAATGTAACCAATTTTGGTGATTATTTTCAATTACCAAACCAAGGATTGCGGACTTACTTTGGCAACGTCGCTAAAGGACAAAGTCGCGTGTTTGACACTCCATTTGCCAGGGGAGAGTCAACGGAAGAGATGTTACAGGAATGGGACAAAATCCTAGTATCAATTAGCGACAAGTGGCCCACCCTGTATGAGTTTGAAAACGACTTGAGGAGCAAAGTCGGCCCATTATCAATCATGCTGCCACTCAAGGACAGGATGAAAGATATAGGTAGC…
Rattus norvegicus associated picobirnavirus 24	1678	TRUE	FALSE	TRUE	533	74.5	525	UBJ26024.1	Rodent associated picobirnavirus	unclassified	Picobirnaviridae	Durnavirales	Pisuviricota	RNA	PP211402	TAGTATGCCTAAAAGTAAAGATACTAGAAATCAAACTGTGAAAGCTAAGGATAAACCTGCAGCTACACAGATGGATAGCTATTTTAAGCTACCAAACCAAGGTCTACGCTCATACTTTGGCAATGTTGTTAAAGGTCAAAGTGAAGTGTACGACACACCTTTCGCTAAGGGTGAGTCAACTAAAGATCTAATTAGCGCATGGAATGAGACCCTTGTGTCAATTAACGACAAGTGGCCTTCATTGTATGAATTCGAAATGGACATGGCTGGCAAAGTCGGACCGCTCAGTGTTATGCTCCCATTGGAGGAAAGAATGGGTGACATTGAAGCCTATTACGAAGGTATTCACCTACCGAGCCAACCACTCGATATTAAAGCAGTCAAAGCCGTGATTGCTGA…
Rattus norvegicus associated picobirnavirus 25	1053	FALSE	FALSE	TRUE	531	72.1	337	AXF38744.1	Shelduck picobirnavirus I	unclassified	Picobirnaviridae	Durnavirales	Pisuviricota	RNA	PP211277	GGAGTTTTATAAACAAATTTTAAAAGAAAGGAGGCTTTTCATTTGCCTAAAAATAATGAAGTTAGATACTACAAACAATCGTTTGTAGCCAACTCAGGTCTAAAGTCCTATTTTGGCAATGTTGTCAAAGGACAACCTGAAGTGTATGACACACCATTTGCCCGTGGTGAGTCAACTGAGGAGATGCTCAGTACATGGATCGCTGTTCTAAAGTCGATTGACAAAGAATGGCCTTCTCTGTATGAGTATGAAATTGACCTCGCGAAGAAGGTCGGTCCAATGTCAGTCATGAAGCCGCTTCGAGACAGAATGTCTGACATTGAATCTTACTATGATGGTATTCTCCTTCCATCAACTGAGATCAGTGATTCGGCTCTGAAAGCGACGATAGCTGATTTT…
Rattus norvegicus associated picobirnavirus 26	1679	TRUE	FALSE	TRUE	531	73.3	535	AXF38744.1	Shelduck picobirnavirus I	unclassified	Picobirnaviridae	Durnavirales	Pisuviricota	RNA	PP211403	GAACTTTACAAGAAATTTGTAAGAAAGGAGGCTATCGAAATGCCTAGAAATTTCGAAACTAAGTACTTTGACGACTCGTTCGTCAGTAGCCCTAACTTACGGTCGTATTTCGGCAATGTGGTTAGAGGACAACCAAAAGTGTACGACACACCATTCGCCAAAGGTGTGCCATTCAAGCAAGTGCTTGAAGCGTGGATGGAAATCCTAGAGTCAGTGGCCACTAGATGGCCTACGCTGTGGGATTTCGAGGTTGACCACGCGAAGAAGGTCGGCCCAATGTCTGTGATGCTGCCGCTCGAGAAGCGTATGTCAGACATTGAGTCTTACTATGAGGGTATTCTCCTTCCCTCGACGGACTTAGATCGACGCGCCCTGCTAGCTGTACGATCTGAGTTCTCT…
Rattus norvegicus associated picobirnavirus 27	1659	TRUE	FALSE	TRUE	531	74.4	532	AXF38744.1	Shelduck picobirnavirus I	unclassified	Picobirnaviridae	Durnavirales	Pisuviricota	RNA	PP211404	CTTTCCAGAAAGGAGGTCATCGTTATGCCTAAAAATAACGAAAGTAGGTATTTTGAAGATTCCTTTAAATCTTCAAATCAAGGTCTAAGGTCGTATTTTGGCAATGTTGTCAAAGGTCAACCTAAAGTTTATGAAACACCTTTCGCCAAAGGTGAATCAACTAAGCAAATGCTTAACGAATGGATGGGACACCTGGAGTCGATTGACACAGCGTGGCCTTCATTGGTTAAGTATGAACAAGACCTCGCGAAGAAGGTCGGACCAATGTCAGTTATGCTCCCACTCTCAGAGCGCATGGATGACATTGATTCTTACTATGATGGTATCCTTCTTCCATCAGAACCTGTGAGTGATCGCGCGGTCAAAGCGGTCATCTCAGAGTGGTCCAAGATCCGCGGC…
Rattus norvegicus associated picobirnavirus 28	1625	TRUE	FALSE	TRUE	533	74.9	533	UBJ26024.1	Rodent associated picobirnavirus	unclassified	Picobirnaviridae	Durnavirales	Pisuviricota	RNA	PP211405	AATATTTTTATGAAAGGAGGTTACTGTATGCCTAAAAATACAGATTCTAAACAAATGAGTAAGTTTTATAGCTTACCAAACCAAGGTTTACGCTCTTATTTTGGCAATGTCCAGAAGGGGCAACCTGAAGTGTATGATACGCCTTTCGCTAAGGGCGAATCAACTAAGCATTTACTTAGCGCATGGAATGAAGTCCTATTGTCGATTAAGGACAAGTGGCCTTCACTTTATGAATTTGAAATGGACATGGCTGGCAAAGTCGGACCGCTCAGTGTTATGTTGCCACTAGAGGAAAGGATGGCTGACATTGATGCGTATTACCAAGGTATTCACCTACCGAGTGAACCACTAGATGAAAGAGCAGTTAAAGCCGTTACTGCTGAGTGGGGTCATGCCAGT…
Rattus norvegicus associated picobirnavirus 29	1552	TRUE	FALSE	TRUE	533	74.9	510	UBJ26024.1	Rodent associated picobirnavirus	unclassified	Picobirnaviridae	Durnavirales	Pisuviricota	RNA	PP211406	CAAATCTTTTGAAAGGAGGTTGCTGTATGCCTAAAAGTACAGATACTAACATGGTAGAATATTTTAAACTACCAAACCCAGGGTTACGCTCATACTTTGGCAACGTTGTTAAAGGTCAAAGTGAAGTGTATGACACACCTTTCGCTAAGGGTGAGTCGACTAAGTCCCTAATTAGCGCATGGAATGAGACCCTTGTATCAATTAATGACAAGTGGCCTTCATTGTATGATTATGAAATGGACATGGCTGCCAAAGTCGGACCGCTCAGTGTCAGACTTCCTTTGCGAGAAAGGATGGATGACATCAAAGCCTATTACGAAGGTATTCACCTACCGAGTGAACCCATTCCTACTCAAGCCATTCACGCGGTCATATCGGAGTGGAGTCACGGCAGCACAA…
Rattus norvegicus associated picobirnavirus 3	1592	TRUE	FALSE	TRUE	517	72.7	498	AXL64616.1	Chicken picobirnavirus	Picobirnavirus	Picobirnaviridae	Durnavirales	Pisuviricota	RNA	PP211407	AATATTTTGAAAGGAGGATCACATTATGCCTAAAAGTAATGTAGTCAAAGCAAGACTGAAAAATGCTGAATATTTTCAACAAGCTTTCGTTTTGCCAAATCAAGGTTTGAAGACTTATTTTGGTAATGTTGTCAAAGGACAACCGGAAGTTTACGACACACCATTCGCTAAAGGTGAGTCTACTCAATTGCTCATGAGGAAATGGATGGAAATCCTGCGGTCGATTGACAATGATTGGCCCTCCTTATGGGATTATGAAATGGACCTCGCGAAGAAGGTCGGACCAATGTCGGTCATGAAGCCCCTCAAGGATAGAATGTCTGACATCGATCATTACTATGAGGATATACTCCTTCCTCAACAAACCATATCACACAGCGCGATAGCGGCTGTAGTGGG…
Rattus norvegicus associated picobirnavirus 3	1628	TRUE	TRUE	TRUE	522	73.6	526	QIR30724.1	Chicken picobirnavirus	Picobirnavirus	Picobirnaviridae	Durnavirales	Pisuviricota	RNA	PP211408	CAAATCTTTTAAAGAAAGGAGCTTGGGCTTATGAAGACTAAGCTAACAAGCAGCGAATTAGAAGTAATTCGCAACAACAGCGGGTTGCAGCGTTACCTAGAGTCTCTACTCAAGGGTAAACCAGCAACACCTCGTTCGTGGTTATACGAACAATTTTCGCCTGAGGAGGTATTGGGAATGTGGAAACAGAAGCTTGCGGTCCTTGAGAAAGGTTCCGAGTTCGAGCAGAATGTATTCCAGTTCGACACTTCTCAGGAAGCGAAGTGGGGTCCCCAGGGCGGAGTGGAGCCTATTTCTAAACTCATGGATATCGTTGAGGACGGCTATGTGCGCTCTCCTAGCACACAGGCATTCCGTGAGTCATCATGGAAATTAGCTAAGCTCAGATGTCGTACTACT…
Rattus norvegicus associated picobirnavirus 30	956	FALSE	FALSE	TRUE	520	66	318	QXV86700.1	Picobirnavirus sp.	Picobirnavirus	Picobirnaviridae	Durnavirales	Pisuviricota	RNA	PP211278	ACACGCTCGAGTCAAACTCAGGTTGGCCTGACTTCCGACGCAGAAGTCTGCCTGACGTCAAGAAAGCCGCAATGTTGGCGGCGAAGGATGGTGCGTGGGAGGAATATCCTGCTCTTGCGCTTTTCCGAAACTATAACCAGAAAACGCGATTGGTTTGGATGTTTCCAATGGCGACCAACATTTATGAAGGCTCCTGGGTACAGCCTATTCAGACTGCAATTATTAAATCCCAAGATTCGTTTTTCGATCCGTGGGTTGGGTTCGAACGAGTGAGGCAGTCGATTTCACGAGTTTACGAGGGCTCTGGCTGTATTATGGCGACCGATTTTAGCAAAACGGATGAGCACTTCACGGAAGAAGCCTCAGCAGAGGTTCAGTGGGTTATAGGACAATTGTTTA…
Rattus norvegicus associated picobirnavirus 31	4101	TRUE	TRUE	TRUE	529	57.5	525	UAW00912.1	Porcine picobirnavirus	Picobirnavirus	Picobirnaviridae	Durnavirales	Pisuviricota	RNA	PP211409	TTTCTTTTAAATCTTTAAATTCTTAAAGATCATTCCCAATTTAAAAGTTGTGGTCTAGTACATCTAAAATGGAATTTGAATTCATTTGAGATGTCGAACCACAAAGTTACACAAAAGGAGTTGTCTAACGCAACAACACCACTTCAGATTCACTTTGCGTCATGGGCTCAAATGTCTCTGAAGTTTGAAAAGCGTACTATAAAACATCACATGTAGGAGGTGAAACTTTGACTAACAATCAAATTGCTTACAACTCGTTACTCGAGACGAGTAGGCACAATCAAGTCACGGAGCGGGAGACTGGCAGACATAATCTCGCTTCTGAGACGGAAACTTCCAGACACAACAAAGCTACGGAATATGAAACAAATCGGTACAATGTAGCTTCCCTGCTTGAAA…
Rattus norvegicus associated picobirnavirus 32	1721	TRUE	FALSE	TRUE	528	77	527	QHN70725.1	Mongoose picobirnavirus	Picobirnavirus	Picobirnaviridae	Durnavirales	Pisuviricota	RNA	PP211410	TTCTATTTTATTCTAGGAACGTTCTGTTCCAGATTTTCACAATTTTATATTTATCTTTCTAAGAACTTTATCGTTCCTAAGAAAGGAGGTTACTATGCCTAGAAATAGTGAAACAAGTTTAGGTAAGTACTTTGAACTGCCTAACCAAGGACTTATGTCCTATTTCGGTAATGTCAAGAGAGGACAGCCGAACGTGTATGATACTCCCTTCGCCAAAGGAGAGTCCACTGAGCATATGCTCCAGTCATGGTTGGATGAACTCGAATCAATCAAGACTAAGTGGCCTACCTTATGGGAGTATGAAATTGACCTCTCCAAGAAGGTCGGACCTATGTCAGTCATGAAGCCACTAAAACAAAGGATGGCAGACATTCAGTCCTACTACGAAGGTATTCTCCT…
Rattus norvegicus associated picobirnavirus 33	1291	FALSE	FALSE	TRUE	534	66.7	426	UJQ88272.1	Picobirnavirus dog/KNA/2015	Picobirnavirus	Picobirnaviridae	Durnavirales	Pisuviricota	RNA	PP211279	GAAAAGGTTAAACCTTCACTTTATCTTAGTGAAGAAGGAAGGACCAAAGCCAGGTCCTATTTCGGTATTGTCAAACAAGGACAACCGGATGTGTACGATACACCATTCGCCAAAGGTGAAAGTACTAAACAGCTCCTCGATAGCTGGAAGGAAGTCTTAGAGTCGGTGAGACGGGAGTGGCCGACTTTGTGGGACTTTGAAAATGACCTCGCGAATAAGGTCGGGCCAATGTCTGTTATGGAGCCACTGCACAGGAGACAGAAAGACATTGAGTCTTACTACACTGGTATTCTCCTACCGGGTGAACCAATCAAACATTCTGCGATCGCAGCGGTTATGTCTGAGTGGAGTAAGTTACGTGGCTTACAAATCCGCAACCAACAAAGGACAGTAGATATG…
Rattus norvegicus associated picobirnavirus 34	689	FALSE	FALSE	TRUE	247	76.6	201	QBJ01804.1	Porcine picobirnavirus	Picobirnavirus	Picobirnaviridae	Durnavirales	Pisuviricota	RNA	PP211280	ATTCCTTTTAATATTGATCGCGAGAATCGACGATTAGCAGGTAATCTCCAACGTCTACCAGATTTCACTGGTGGCATCACTGCAGTTTTGGGATGGAGAGGTCAAGAAGGCGGCGATTCTAAGGAGGATGTTAAGCAGCGAGTGGTTTGGATGTTTCCATTTGCAGTAAACATCGCTGAACTCCAAGTGTATCAGCCATTGATCGAAGCCGCACAAAAGTTCGGTCTAGTCCCTGCTTGGGTTAGCATGGATGCGGTTGATAGGCGCATCACGAAATTATTTGATACCAAGAGTAGTGATGATCTCATTATTTGCACAGACTTTTCGAAGTTCGACCAACATTTTAATTCTTCTTTAAGCTCAGTAGCTAAATCACTAATAGGCTCTATGTTTAACAGT…
Rattus norvegicus associated picobirnavirus 35	1437	FALSE	FALSE	TRUE	530	73.1	475	UAW00549.1	Porcine picobirnavirus	Picobirnavirus	Picobirnaviridae	Durnavirales	Pisuviricota	RNA	PP211281	GTTACTTTAGAATGTTTAAAAGTAACGCAACTAAGTTCGGTAATTACTTTAAATTACCAAATCAAGGACTACGGGCCTACTTTAACAGAGTTGTTGAGGGTCAGCCCCTAGTGTACAACACACCATTCGCCAAGGGTGAAAGTACTGAGAGTCTTTTAGACAACTGGAATGCTACCTTAGAGTCAATCAACAAGAGGTGGCCTTCATTGTACAAATTTGAAATGGACATGAAGAGTAAGGTTGGACCACTATCAGTCATGAAACCACTCAAGGAAAGAATGGATGATATCAATTCTTACTATACTGGTGTTGAAGGTACGCCAGAACCCATATCTGATAAAGCGGTTAGCGCGGCGCTAAAGGAATGGGAGAGATGTCGCGGCTTGAGGAAACGCGAAC…
Rattus norvegicus associated picobirnavirus 36	1695	TRUE	FALSE	TRUE	544	79.9	533	UZS00514.1	Porcine picobirnavirus	Picobirnavirus	Picobirnaviridae	Durnavirales	Pisuviricota	RNA	PP211411	CTATATTTTCTAATTTAATTCTTATTTATTTCTTTGAATGCTTTAGAAAGGAGGATTATTCCTATTGTCTAAAAGCATTGAAGTCAATGTAGCTAATTACTTTAAGCTACCAAATCCAGGTTTGAAGTCATACTTTGGCAATGTCGAGAAAGGACAGCCTAAAGTGTATGACACACCTTTCGCCAGGGGTGAGAGTACACCACAGCTACTCGATAATTGGCGAGAAATCCTTGTGTCAATCTCGAAGGAATGGCCCTCGTTATGGGAGTTTGAGAATGACCTCGCAAGCAAGGTTGGTCCATTGTCGATTATGGCCCCCCTCAAGGACCGTATGTCTGACATTGATCATTACTATGAAGATATTCTCCTATCTTCAACCCCTATTCTCGATAGAGCTTG…
Rattus norvegicus associated picobirnavirus 37	1604	TRUE	FALSE	TRUE	537	77.3	520	UAW00782.1	Porcine picobirnavirus	Picobirnavirus	Picobirnaviridae	Durnavirales	Pisuviricota	RNA	PP211412	ATTATTTTCAATTGCCGAACCAAGGATTACGGACTTACTTTGGCAATGTTGCTAAGGGTAATCCAAAAGTGTATGACACACCTTTCGCTCGAGGTGAGTCGACTGAGTCTATGCTTAAAGCATGGAATGAGGAGCTCGTGTCAATTAGCGACAGGTGGCCTTCTCTGTATCAGTTCGAAATTGACCTCGCGAAGAAGGTCGGTCCGATGTCTGTTGTTAAGCCGTTATCGGAAAGGCTTACAGATATTGACGCTTACTATGATGGAATTCTCCTCCCATCAAAACGCATTAGTGACCGCGCAATATCCGCTGTGATTAATGAGTTTTCTAGTTCCCGCGGACTAAGAGTCAGAATCCAGGCTCACACCCTGAGAGAAATGAAGAAATCCTCAAACTCTG…
Rattus norvegicus associated picobirnavirus 38	4637	TRUE	TRUE	TRUE	531	54.9	530	ANS53886.1	Picobirnavirus wolf/PRT/1109/2015	Picobirnavirus	Picobirnaviridae	Durnavirales	Pisuviricota	RNA	PP211413	GTCAAGCTTAGATTGCTTGACTTCTATTTATTCTTTAAATCTAATATTTAATTATTAGATTTCCAAAACCAGCGTAACTGTAGACAGTACACAACTAAGCTTGACGGAAAGGATCAGGCTATGACATCAAATCAATTGCAACATCAACAAAATGTTGAAACTCGGAGACATAATATTGTATCCGAACAAGAAATTTCAAGACACAACCTCGCTAGCGAAGGTGAGACCCAAAGACATAATATTGTGGGTGAAGCAGAAACTTCAAGACATAACAAACAGTCTGAAGTTGAAGCAGCTAGGCATAACTTAGCAGGTGAACGTGAAACTGCTCGGCATAATGTGGTTTCTGAGGATCAGTTAACACAACAATTGCTTGAAACTAAAAGACACAACCAAGCA…
Rattus norvegicus associated picobirnavirus 39	759	FALSE	FALSE	FALSE	363	82.5	251	USE07894.1	Picobirnavirus sp.	Picobirnavirus	Picobirnaviridae	Durnavirales	Pisuviricota	RNA	PP211282	TGGAGTGGTGCAAGTACTGAGAGGTCAGATCTTCTCGGCTGCTGCTGTTATCGGGTGGCGCGGTCAAGAGGGCGGTCCTGAACCGAAGGATGTGAAACAACGAGTGGTCTGGATGTTCCCATTCGCTGTCAACATCCAGGAGCTGCAGGTTTATCAACCTTTAATTGAAGCCGCACAAAAATTCAATTTAGTTCCAGCTTGGGTTAGCATGGAATCGGTTGATGAACGCATCACAGCTATGTTTGATACCAAAGCTAGTGATGATTTGGTCGTGTGTACCGACTTCAGCAAGTTTGACCAACATTTTAATCCTGATTTACAGTATGCGGCTGAGACAGTGTTGGCTAGTATACTGACTCGGGACGCCGATAGTGAACGTTGGTTGAACACAGTGTTCCC…
Rattus norvegicus associated picobirnavirus 4	1510	TRUE	TRUE	TRUE	549	73	496	AVX53264.1	Marmot picobirnavirus	Picobirnavirus	Picobirnaviridae	Durnavirales	Pisuviricota	RNA	PP211414	GAATTGGGAAACCATACTTGCGAGCCTGCGAGACGGTTCGAAAGCGGAACAAGAGGTATTCCAGTTCGACACTGCTCAGAAGAGCAAGTGGGGCCCCCAGGGCGGCATCGCCCCTATAGCTCAGTTGATGGACCTCGTTACCCGCGGTTTCGGGGACTCTCCTACTCCGAAGGCGTTCACGACTGTAGCGTGGAGTGATGCAAAGGCTTCTGTGATCGATGATCTCTACCGGTTAGGATGCCGAAATCTCCGCCCGGCGGCGTACAAGCGTGTGGTCGACGACATGCGCGCTCGAGATACCCTAGAGTCCAACTCTGGATGGCCATTGTTTACACGGAGAAACAAGCCAGAGGTCGTCGCGTCATCCATTGCCGATGCCGAAAGCGGCAAGTGGAAGGA…
Rattus norvegicus associated picobirnavirus 4	686	FALSE	FALSE	TRUE	549	68.4	228	AVX53264.1	Marmot picobirnavirus	Picobirnavirus	Picobirnaviridae	Durnavirales	Pisuviricota	RNA	PP211283	TGTTGATGACATGCGGGCTCGTGACACGTTGGAGTCAAATTCTGGCTGGCCGCTGTTTTCTCGTCGAAACAAGCCAGAAGTCATCAACCAGTCCATAGCCGATGCGGAAAGCGGCGTGTGGAAGACGTATCCTGCTATAGCTCTTTTCCGGAATTATAACTTGAAAACGAGATTGGTTTGGATGTTTCCAATGTCGGCGAACATTGTGGAAGGTTCGTACTTTCAGGTTCTTCAGTCTCAATTGATTAAGGCGCGATCCTTATTTCTCGCCCCGTGGCAGGGCTTTGAGACTGTGCGCATTGCTGTTACCAATGCGTATGCGCAAGATAACTGGTATCTGAGCGCGACTGACTTTTCCGAGACAGATGCGCATTTCCATTTAGCTGCAACAATGGAAGT…
Rattus norvegicus associated picobirnavirus 40	996	FALSE	FALSE	FALSE	532	82.2	325	QXV86671.1	Picobirnavirus sp.	Picobirnavirus	Picobirnaviridae	Durnavirales	Pisuviricota	RNA	PP211284	CTTTATGAAAGGAGGTTCACTGTATGCCTAAAAATACAGATACCAATTTTGATAGCTATTTTAAGTTACCAAATCCAGGATTGCGCTCTTATTTTGGCAACGTCCAAAAGGGTCAATCTAACATTTATGATACACCTTTCGCCAAAGGTGAATCAACTGAACACATGATCAGTGAATGGAATGATAAACTCGTGTCGATTCAGGACGAGTGGCCTTCACTGTATGAGTTCGAAACCGACATGGCTAGCAAGGTCGGACCATTGAGTGTCATGCTACCCTTGAGGGAGAGGATGGATGACATAGATGCGTATTACAAAGGTATTCTCCTACCGAGTGCACCCATCGACGAGCGCGCTGTCAAAGCAGTAATTGCCGAATGGGGTATAGCTAGCACCATTA…
Rattus norvegicus associated picobirnavirus 41	1694	TRUE	TRUE	FALSE	533	84.5	534	QXV86675.1	Picobirnavirus sp.	Picobirnavirus	Picobirnaviridae	Durnavirales	Pisuviricota	RNA	PP211415	TTTTGCAAATCTTTAGAAAGGAGTTACTTTTCACTCAAATTTAAAGAAAGGAGGCCCTCATTATGCCTAAAAATAATGAAAGCAAGGCTTACTTTGAAAGTAGTTTTGATGTAAGCAACAAGAACTTGAGGTCGTATTTTGGCAGAATTGTCAAAGGACAACCTGAAGTCTATGACACACCGTTCGCCAAAGGTGAATCAACTTCACTGCTCATGAAGAGATGGATGGCTATCCTAAAGTCGATTGACAAGGAGTGGCCTACTCTGTGGGATTATGAAGTTGACCTCGCGAACAAGGTCGGGCCAATGTCTATTATGCTACCCCTCAAAGAGCGTATGGACGACATTGACTCTTACTACGAAGGTGTTCTCCTACCTTCGAAACCAGTAAATCACAGCG…
Rattus norvegicus associated picobirnavirus 41	956	FALSE	FALSE	FALSE	533	85.8	317	QXV86675.1	Picobirnavirus sp.	Picobirnavirus	Picobirnaviridae	Durnavirales	Pisuviricota	RNA	PP211285	GGAAGGCGGCCCTGCGGACGCAGATGTGAAGCAACGTGTGGTTTGGATGTTTCCATACGCTGTGAACATCTGTGAGTTGCAAGTCTATCAGCCGTTGATCGAAGCCGCACAAAAGTTCGATCTTATCCCTGCCTGGGTTAGCATGGATAGTGTTGATAGAGCGATTACCCGCATGTTCGACACAAAGCGGGAGTCGGATTTAGTCGTATGTACCGACTTTAGCAAATTTGACCAACATATCAATGGGTATTTGCAGTTAGTAGCCGAGAAATTACTGCGCGATATCCTAACTGCAGGTTCCAAGACCTCCTCTGACTGGTTGGTCGACGTATTTCCGATCAAGTACATGATACCTCTAGCCTACGATTGGAATACAGTTCGGTTTGGTGCGCATGGAAT…
Rattus norvegicus associated picobirnavirus 41	1704	TRUE	FALSE	FALSE	533	83.9	534	QXV86675.1	Picobirnavirus sp.	Picobirnavirus	Picobirnaviridae	Durnavirales	Pisuviricota	RNA	PP211416	TAATTTTGCAAATCTTTAGAAAGGAGTTACTTTTCACTCAAATTTAAAGAAAGGAGGCCCTCATTATGCCTAAAAATAATGAAAGCAAGGCTTACTTTGAAAGTAGTTTCGATGTAAGCAACGAGAACTTGAGGTCGTATTTTGGCAGAATTGTCAAAGGACAACCAAAAGTCTTCGATACACCGTTCGCCAAAGGTGAATCAACTTCACTGCTCTTGAAGAGATGGATGGCTATCCTAAAGTCGATTGACAAAGAGTGGCCTACTCTGTGGAGTTATGAAGTTGACCTCGCGAACAAGGTCGGACCAATGTCCATCATGCTCCCTCTCGAGGACAGGATGTCAGACATTGATTCTTACTATGACGGTATTCTCCTTCCGTCAAAACCAGTAAAGCATA…
Rattus norvegicus associated picobirnavirus 42	1589	TRUE	FALSE	FALSE	517	82.8	517	QXV86682.1	Picobirnavirus sp.	Picobirnavirus	Picobirnaviridae	Durnavirales	Pisuviricota	RNA	PP211417	TACAAATTTTATTTGAAAGGAGTTTGGTCTTATGTTGACTAAGCTAACAGATTTTGAGCATCTGGTTGTTAGTAACAACGAACAGCTCAGACGTTACCTCGAGTCGCTACTCGAGGCACAGCCTCATACCCAGAGATCTTGGTTGTATGAGAACATCAAGCCTGAGGAGGTGTTGGAATCCTGGATGTCTATCCTTCGTCGTCTCGAGAAAGGATCGAGCTTCGAGAGGAAAGTATTCCAATTCGACACTGCTCAGCTAAGCAAGTGGGGACCCCAGGGCGGTCACCCGCCGATCACCCAGTGTATGGATGTCGTAAAGCAGGGCTTCGGGGACTTCTCCCCCCCGAAGGGCTTCAAATATGCTGGTTGGGACGTGGCAAAGAGCGACTTCGTAGCGCA…
Rattus norvegicus associated picobirnavirus 43	1560	TRUE	FALSE	FALSE	523	88.9	506	QXV86690.1	Picobirnavirus sp.	Picobirnavirus	Picobirnaviridae	Durnavirales	Pisuviricota	RNA	PP211418	TTTCTATTTACAAAATCTTTTAGAAAGGAGCTTAGAACTAATGAAGACTAAGCTAACTAATTCAATGTTAGAAGTTGTGAACTCTAACACTATGTTGAAGCGTTACCTCAATTCATTGCTTGAAGGTAAGGCAGCCACACCGCGTTCGTGGCTTTACGAAGACACCTCACCTGACGTGGTGCTCGATCGTTGGACTGCGATTCTCAAAGACCTGAAAGATGGTTCTGAGTTCGAGAAAAATGTATTCCAATTCGACACTGCTCAGATTGAGAAGTGGGGACCCCAGGGCGAAGTCGCGCCTATTAAAGATTTGATGGATATCGTTGAGCAAGGTTTCGGTGATTCTCCTGTCCCGAAAGCGTTTTCCACCAAAGCTTGGCGTGAGGCTAAGGATACGGT…
Rattus norvegicus associated picobirnavirus 44	1637	TRUE	FALSE	FALSE	533	82.4	533	QXV86711.1	Picobirnavirus sp.	Picobirnavirus	Picobirnaviridae	Durnavirales	Pisuviricota	RNA	PP211419	GAAAATTTAAAGAAAGGAGGTTTCTCTATGAAAGAAACCAAGCTATCTAAGCAACAGCTTGAAGTTATTCAAGCAAATAACGGATTATCTAGATATCTGAGCGGCCTTTCCGAAGGGAAAGAAGCCACGCCTAGATCAAATCTTTATAATCTAGAAGGCAAAACTTCACTATTACAACCTGACACAATCCTGAAGCGTTGGCAATCGAAGTTATCAACCCTGGAAAATGGGGATACCTTTGATAGGAATGTGTTCCAGTTTGACTCTGCACAGCTGCAGAAGTGGGGACCACAAGGTGCAGTTCCGCCGATCAGTGACATCTTGGAGGAGATAGTCTACCCTAGTTTCACCTCTAGTGGAAAATCGCCGAACTTGTTCAGTACCGCGGCCTGGGCCTTA…
Rattus norvegicus associated picobirnavirus 45	1627	TRUE	FALSE	FALSE	548	81.7	531	USE07834.1	Picobirnavirus sp.	Picobirnavirus	Picobirnaviridae	Durnavirales	Pisuviricota	RNA	PP211420	ATTCCATATTTTCTTTTATCATTTTCTCTTAGATTTCGGAAAGGAGGACATTCTTTTGTCTAAAAGTTTCGAAGTCAATCTTAGTAGCTACTTCAAGCTACCAAATCCAGGTTTGAAGTCATACTTTGGCAATGTCGTGAAAGGACAACCACTGATTTATGACACACCTTTCGCCAGAGGTGAAACAACTCCAGAATTACTGGAGAATTGGCGTGTAATCCTTGAGTCAATCCGACAGGAGTGGCCTTCATTATGGGATTACGAGAATGACCTAGCTGAAAAGGTCGGTCCGATGTCTGTCATGCTACCGCTCAAACAGAGAATGGCAGATATTGAACATTACTATGAGGATATTCTCCTATCCTCACAGCCTATTCTTGAATCAGCATTGAAAGCAGT…
Rattus norvegicus associated picobirnavirus 5	1142	FALSE	FALSE	TRUE	520	32.3	127	AOW41972.1	Picobirnavirus sp.	Picobirnavirus	Picobirnaviridae	Durnavirales	Pisuviricota	RNA	PP211286	GGCGTTTTGTACGGAGGGTGTGGGTGTAATCTCCACACTAAATTCATTCTTGGAGGAAACTATGCAAGATTACAAACAGATTTTTGAAGACTCACTCGTACCCGCTGAAGTCTATCAGGCGGGGAATTTCGCACGTGCGCGAGATTGGGAGGCGGCGATCGGATTCGTAGCGGCACACTTGACCACTGTAGGCGATACTCGTTACTACAATTGTGTGGAACGCGACGGTCTTGACGTAGCGTCACATCGCTATCGCGGTATCCTCGGATATGGAGCAATCCCTCTGAGCTACCATCAGCAGTCTAAGGATCCTAGATCCATTAACCATTCTCGTGGTTTTCAGTACGCCATAGGTGTAGCGAAAACTGTGGCCACAATGGGACGAACCGCATTCTTGAG…
Rattus norvegicus associated picobirnavirus 5	744	FALSE	FALSE	TRUE	520	43.2	236	AOW41972.1	Picobirnavirus sp.	Picobirnavirus	Picobirnaviridae	Durnavirales	Pisuviricota	RNA	PP211287	GGAATTCGGTGCTTACATCGAGGAACTCTTCCATCAGGAAGTGTATCTTGGAGAGAAGGTGTTGACTGGACTGCATAACCTTTTCTCCGGTCAGATCATCACGAATGATATAGAAACTATATATGACGTGTGTTTACAGCTGGGCGTAGCTGTCGAACTAGACATCCCGTCGAACTATTTCATCGTGCTAGCCCTAGGAGACGATCAGGCTTTCCTGTTAGATCCACGGGCTAAATGTGATCCGAAGTATGTCATGGATATGTTGGTAAGTGAAGCTATCCGGAATGGCCACGAGATCAATATGCAAAAGTGTGATTTGCAGAGATCTACTGTGCGCTATCTCAAACGGCTCTACTACCCTGGCTTGCCAGTGTCTCTTAATAAGTATTCCGGAGAGAG…
Rattus norvegicus associated picobirnavirus 6	1476	FALSE	FALSE	TRUE	533	79.2	485	QXV86711.1	Picobirnavirus sp.	Picobirnavirus	Picobirnaviridae	Durnavirales	Pisuviricota	RNA	PP211288	CTCGAACCCGACGAGATCCTTAAGCGCTGGCTATCAAAGCTGAGATCCCTGGAAAATGGGGATTCCTTTGACAAGAATGTGTTCCAGTTTGATTCTGGTCAGCTCCAGAAGTGGGGTCCTCAAGGCGGTGTTCCACCGATCGAAGACATTTTAGAGGAAATAGTCTATCCTAGTTTCTCCGCTAGTGAAAAGATCCCTGAAGCATTTTCCGATGCTGCCTGGACGCAAGCAAAGCGTCAAGTGGAGCGTAAGCTACACTCATCAGGGTGTAAAGGATTAAGCCCAGTCCCCTATAAGCGCGTAGTTGACGACATGTGTGCGAGAGATACTCTCGAATCTAATTCAGGGTGGCCCTTATTTACCAGAAGGAACAAACCTGAAGTCGTTATACAGTCTTGC…
Rattus norvegicus associated picobirnavirus 6	1651	TRUE	FALSE	TRUE	533	79.9	533	QXV86711.1	Picobirnavirus sp.	Picobirnavirus	Picobirnaviridae	Durnavirales	Pisuviricota	RNA	PP211421	GTAGACATATTTTTGTCTATTAAATTATTATTTAAGAAAGGAGGTTTCTCTATGAAAGAAACCAAGCTGTCTACTGAGCAGTTACATATTATCAGTAACAATAGCGGATTACGTAGATATCTGAGTGGCCTTTCCGAAGGGAAAGATTACACGCCTAGATCAAATCTATATAATCTAGAAGGAAAGACGGAACAACTCGAACCCGACGAGATCCTTAAGCGCTGGCTGTCAAAGCTGAGATCCCTGGAAGATGGAGATCCTTTTGACAAGAATGTGTTCCAGTTTGATTCTGGTCAGCTCCAGAAGTGGGGTCCTCAAGGCGGTGTTCCACCGATCGAAGACATCTTAGAGGAGATAGTCTATCCTAGTTTCTCCGCTAGTGAAAAGATCCCTGAAGCA…
Rattus norvegicus associated picobirnavirus 7	1642	TRUE	FALSE	TRUE	553	78.1	540	QXV86666.1	Picobirnavirus sp.	Picobirnavirus	Picobirnaviridae	Durnavirales	Pisuviricota	RNA	PP211422	CTTTATGAAAGGAGGCTTCGTTATGCCTAAAAATAACGTAACTAAATTCGTCAATAGTCATTTTATTGACGTTCCTTACCAAAGTGTATTCACTAAGGAAGGATTCAACAATTTTAAGACATATTTTGGTAATGTCGAGAAAGGACAGCCAAAAATATGGAAAGCTCCCTTCGCCGGGAAAACACCGATTTCTACAGTAATGAAGGAATGGAATGCTGTTCTTGTATCAATTCAAGACACGTGGCCTTCATTGTATGAGTTTGAAATCGATCTCTCGAAGAAGGTCGGTCCATTATCCGTCCAACTGCCGCTTGCCCAAAGGTTGCCGGATATTGCGAATTACTATGAGGATATTCTCCTATCTTCAGCACCTCTGAACCCCGTTGCCATAAAAGCGGT…
Rattus norvegicus associated picobirnavirus 7	1797	TRUE	FALSE	TRUE	553	73.7	552	QXV86666.1	Picobirnavirus sp.	Picobirnavirus	Picobirnaviridae	Durnavirales	Pisuviricota	RNA	PP211423	ATCTATTTTAAATCATGACTCGTTCTGAGTCAATATTCCAATTATTTATTACCTTTTATCACAAAGAATGAGTTGTGTAGAAAGGAGGCTTCGTTATGCCTAGAGATAACGTAACTAAGTTCATCAATAGTCATTTTATTGATGCACCCTATGAAAACGTGTTTACGTCGGACGGGTTCAACAACTTTAAGACCTATTTCGGTAATGTCGAGAAAGGACAACCAAAGGTCTGGACAGCACCCTTCGCCGGTGACACACCAATCCATGAAGTCATGGACGACTGGAGGAGAGTCCTCGTGTCAATCGAAGACAAGTGGCCAACTTTAATGGATTTTGAAAAGGACCTCGCGAATAAGGTCGGCCCATTATCGGTTCAGTTGCCCCTCAAAGACAGGATCG…
Rattus norvegicus associated picobirnavirus 8	845	FALSE	FALSE	TRUE	524	59.2	282	QXV86680.1	Picobirnavirus sp.	Picobirnavirus	Picobirnaviridae	Durnavirales	Pisuviricota	RNA	PP211289	CAAGATCTTGGTTATATGAAGATCTTGAGCCAGACGATATTCTTAACAACTGGTTAAATCACCTAAGTGTTCTAGAGCACGGCTCAGAATACGAGAGGAAGGTATTCCAGTTCGACACTTCTCAAATAGAGAAGTGGGGACCTCAGGGTGAAGTTGCGCCGATGCGCGATTTACTTGCAGACGTAGTAATGCCGACCTACGCAGACGCGGATTCTCCTCCGCCGAAGGCTTTTACTACTGAACAATGGAAGCAGGCAAAATGTGCGAGCACCGCATATTTGCAACAGCTTGTAACCGGAAAGTTACGCCCTGCGTCGTATACGCGCGTAGTTGACGATATGCGCGCTCGAGACGTGCTCGAGTCAAATTCGGGGTGGCCAGATTTCGCACGCAGAAATC…
Rattus norvegicus associated picobirnavirus 8	1653	TRUE	FALSE	TRUE	524	60.8	528	QXV86680.1	Picobirnavirus sp.	Picobirnavirus	Picobirnaviridae	Durnavirales	Pisuviricota	RNA	PP211424	AAGAAAGGAGAAATTTATGAAAATTTCCAACGTACCGAATAGTGTGCGAGAAGTTATCGAGCAAAATGACTCGATGCACACGTACCTTGTGAATCTTTCCAAGGGAAAACTTCCAACAGAAAGATCATGGCTTTACGAAAATGTAAAAGATCCAGATCAAATTCTAAAATCTTGGCTAAGCATACTTAGTTCCCTTGAAAATGGATCTGAGTATGAACGAAATGTATTCCAGTTCGACACTTCACAGATTGAGAAGTGGGGATACCAGGGTGGCGTTGCGCCAATCGACGATTTGTTAGCAGATATAGTTCTGCCTACTTTCTCTTCCTCCAAAGTAGAAATGGAAGCAGAGCAAACATTTGCGAACAGCGCAAAGTGGGAAACAGCACTATCCGCCGC…
Rattus norvegicus associated picobirnavirus 9	1341	FALSE	FALSE	TRUE	537	69.2	445	UAW00552.1	Porcine picobirnavirus	Picobirnavirus	Picobirnaviridae	Durnavirales	Pisuviricota	RNA	PP211290	ATTCAATGAAAGGAGGTTACTTTATGCTTAAAAGTAACGCAATTAAGTTTAGTAATTACTTTAAATTACCAAATCCAGGACTAAGGGCCTACTTTAGCAATGTTGTTAAAGGACAACCATTAGTCTATGACACGCCTTTTGCTAGAGGCGAGAACACAGAAACACTATTGTCCAAGTGGAATGAAGTCCTTGTATCGATTAACGACAAGTGGCCTTCATTGTACAAATTTGAGATGGACATGAAAAGTAAGGTTGGACCACTATCTGTCATGAAGCCATTACGTGAAAGAATGGATGACATCCAGGCTTACTACACTGGTGTTGAAGGTGCACCAGAACCCATCGCTGATAAAGCGGTTAGCGCAGCGCTATCAGAGTGGAAGAAAGCTGCTGGCATGC…
Rattus norvegicus associated picobirnavirus 9	1600	TRUE	FALSE	TRUE	547	67	527	UAW00569.1	Porcine picobirnavirus	Picobirnavirus	Picobirnaviridae	Durnavirales	Pisuviricota	RNA	PP211425	CAATCTTCGGACATACTTTGGTATAGTCCTAAAGGGTAACCAAACAGTTTATGACACACCTTTCGCCAAGGGTGAGTCAACATCCGACCTGCTCAAGGCCTGGATGAGGGAACTCGTGTCGATAAAGGACGAGTGGCCTTCATTGTGGAGTTTTGAGAATGATCTAGCGAAGAAGGTCGGCCCGATGTCTTACATGCTGCCACTCAAAGACCGCATTGCAGACATCCAGCATTACTATGATGACATTCTCCTGCCATCAAAACCTATTCTTGAGAAGGCGAGTGACGCCGTCATCTCAGAGTGGGGCACGTACCGCGGCGTGCGACACAGGAATCAGGACAAAGTAGTTGAACTAATGAAGAAGTCAACTAATTCTGGTTCGCCATTTTTCACCAAACG…
Rattus norvegicus astro-like virus	5571	TRUE	TRUE	TRUE	1410	58.3	1401	USM11153.1	Avian associated bastrovirus 2	unclassified	Astroviridae	Stellavirales	Pisuviricota	RNA	PP211426	GGACAGGTCCCAAAGAAGAATACCCATCAAAATGTTTCGCGACAGCAAAACCAACCAGCAATTTCTTGAAACTCAAGACAATGCGTACCTTATGCAACAGTATAAGTGTGCACTCACCATCCCCATGGTGACGCCCGCAGTCTTCGAGTCCCTCTCCAGAGCTTACGCTCCAGTCTTACTTAAATGTAAAGCCACCCGATGCGCCCGCATTCCATCTGAAGGCCATCAAATTGGTCAGTCTCATCTCATCATCGCTGATCAATACCTCACCAGTTTCATCGAGAACCATAACGAATTCATCGAAATCGGACCGAACCCCGCGAACTTTGTTCGACGGGCCACTGGAAAAATCAATCCCCATGGATGCACCCTCCGCTCTGGTCGGGACCAAGCTCGGTA…
Rattus norvegicus bunyavirus	735	FALSE	FALSE	TRUE	2198	36.3	113	QWX94187.1	Gonipterus platensis bunyan-like virus	unclassified	Unclassified Bunyavirales	Unclassified Bunyavirales	Negarnaviricota	RNA	PP211291	GGAAGGTGGACTGGATATATTAATAGATGAAAGAGAAGCACAGCTGAAAGAAGACATAAAGAACCATTCAATTAGAGAGTTGGCATCAAATAGTAGATCTGAGACTGGTGTGAATATAGAGTCAGTCTTGCAGACTGTGGAAACCATGGATTTTGATTTGTATAATGTGGATGTGGGGTTGTATCAAGTGTATTTCCATAATCTGAACGAGGACCTGAATCCCTATGCCCAATCAGTTATCAGAAGAGACACATTCAACCATTTGTACATGCATCCTCTGTGGGATGGGTTTATAGATTATATGCTGAACCTTGACCATAAGTTCTTTGACAAACTCTTCAAAGGGATAACTTCTATGTTTGATGAGAAGATGTCCAGATGCCTAATGGAGATAATGGG…
Rattus norvegicus cripavirus	1414	FALSE	FALSE	FALSE	1675	81.1	470	ULF99871.1	Cripavirus sp.	Cripavirus	Dicistroviridae	Picornavirales	Pisuviricota	RNA	PP211292	GCGTTTATCACAGGTGTTCTACGCAGGAATTGGCAGAGAATTATATTCGCATACGTGATAGAGATCTTGTCGTTTTTGAAATGAAGCGTAAAGGTATTGCATTTGGTGATTTGGTTAAACACATTCAAACGAAATCGATGTCGTATTCACACAACGTTCAAACCGTTGTGTTGGCCCGGCAGAGATTGAGTGGGATGAGTGTTTCTCCAAATGCCCTGACTTCTGTAGATGGTTACTTGAGTGTTTCCCCCTTATCTATTGATTTAGATATGCGAGGTGAAATCATAGAAGTGGTTAATGCAGAGAGCTGGATGTATACTGGTGTAACTCAAAACGGTGATTGTGGAGCACTTTTATTATTAAGTAATAATCGTGTCCCCGCAAAAATCGTTGGAGTGC…
Rattus norvegicus mischivirus	2455	FALSE	FALSE	TRUE	2500	65.6	818	WDW25846.1	Canine picornavirus	Mischivirus	Picornaviridae	Picornavirales	Pisuviricota	RNA	PP211293	CCAGCGCTCGCTGTTCTACTGCAACCTGGATTGTTTGGATGATCTGGTGGATCTGATCCTGGATCAGATCACTGTGAGAGCCGCCAATTCCAAGCGGTTCCACAAGCTCATCAAACAAGCTGGTGAGCTCCCTGAAAATCCTCCTCCTCCCTCCACCTCTTCCTCTCTCCCCAACCTCCACAAACCTCCCCACTGCTACTCTGACTGCGACGAGAAGTGTGACCACTTCTCGCCGGAGTGTCCAGGGTGTGGTGTCCCCCCGAGCCCTTTCGAGGCCGTTGACAAGGTGTTTGATCACTTGTCGGCTGGACTTGATCGGTTCGCTCCACCTCCTCCTCCTCCTCTTGTTCTTGACTCTTCTGCCTCCACGCCTGAAGAGATGGTGCGGGCAAACCAGCC…
Rattus norvegicus mischivirus	6783	FALSE	FALSE	TRUE	2500	65.2	2234	WDW25846.1	Canine picornavirus	Mischivirus	Picornaviridae	Picornavirales	Pisuviricota	RNA	PP211294	GTGCTGGCCACAGACCCTTCCTCCACCCAACATGGCAACACTGAAATCCAAACCCAAGCCCCCTACAGTGCTGTCATTGCCTACCCTCCAGAACCCTACCCAACCCTCCCCAACCCAGATGCACCTTCTTGCCCAGGCCCCTCGGGAGACCGAGCGTGGCTTGTGGATACCTTCAATTGGCCCGAAGGTAATGTAGAAGGAAATTGGCTGTGGGGTCCCAATGCCTGGAACTCCACTGACACAACCTATCCCCCTGGCCCCATTGGAACCTCCCAGCCTCCCCAGGGATCCTACCCCTTCCCCTGGTGCCTCACTTGGGCTGCGCCCAAGTGTGTGTGGACCTCCATGTACCAGCAACACGCCTATTGGCGTTCTGGCTGCCGTTTCCAACTGGTAGTC…
Rattus norvegicus mischivirus	2737	FALSE	FALSE	TRUE	2500	67.1	799	WDW25846.1	Canine picornavirus	Mischivirus	Picornaviridae	Picornavirales	Pisuviricota	RNA	PP211295	CTCTTCCTCCCTTCCCAACCTCCATAAACCTCCCCACTGCTACTCTGATTGCGACGAGAAGTGTGACCACTTCTCGCCGGAATGTCCAGGGTGTGGTGTCCCCCCGAGCCCATTCGAGGCCGTCGACAAGGTGTTTGATCACTTGTCTGCTGGTCTTGATCGGTTCGCCCCCCCCCCCCCACCTCCTCTTGTTCTTGACTCTTCTGCTTCCACACCTGAAGAGATGGTGCGGGCAAACCAGCCCGTATCGTTTATTGAAAAGGTGTGGCAGTACAAGAAACCCATCTTTGCTGCTACTGCTTTCCTCACTGTCCTTGGCTTCGTGACCACTGTGGTTACGATGGCCATGCTCTACCGGCGGGAGACGCGTCAGGGCGCTTACTCCGGGATGCCAAACCA…
Rattus norvegicus mischivirus	7711	TRUE	TRUE	TRUE	2500	64.4	2525	WDW25846.1	Canine picornavirus	Mischivirus	Picornaviridae	Picornavirales	Pisuviricota	RNA	PP211427	TAGTCACAGTAGCCAGTTGTTTTGGGATATGCCTTTCTTCATGTCTTCTTCTTCTTTCCCCCACCTTGCTCACTCTCCTCTTCCTCCTGTTCCTACTTTGCCTCATAATGTCTATTATGAGGATTCGATGGAGGAATTCTTCAATCTCAACCTTCTCGGTCGTAACCTTGCGCTTCATCCGAAGCCCGAGGTGAAAGCCTTCTACAGATCTTACTTCCAACCCGTCCGTCAGGGCGGGATCTTTTCTTCTTTCTGGAACTATCTCCACGCTCCGTGTGCTGCGACGTGGGTGGTCTGGAACCCGCAGGACCTCCTTGCGGGATACCAGCTCCGCCACCGTTCGCCCCGGGGTGACCTCATCCAGATTGGCTGGGTGCCTGCACCTGGCAATCGCTTTCT…
Rattus norvegicus ribovirus 1	2762	FALSE	FALSE	TRUE	1358	77.6	912	UOI84724.1	Ceratitis capitata reo-like virus 1	unclassified	Unclassified Reovirales	Unclassified Reovirales	Duplornaviricota	RNA	PP211296	ACCGATCTTATTAGGAATCAGACAATGACACATGGAAAAATCTCACGCAAATTTAACGAACGAACAGAAATATTAAAACAACAAATAAAAACGAAATTAGAATATCTTGATAAAAAGAATGAAAAGAAAGCGGGTGAATTTAAGAATACAAAATCAATACGAAGAACTGGAGAGAATACATTAGTGTTCGCGCACAGAAGAATTAAACAACGGGATCTTGATAACACTAGAATAAGCGAACTGTATGATTTAATAGATACCAAATATGTAAATATATGTTTTAATCTTTGTTGTAAAGAAGCGATAATTACAGACTCAACGATAAATGAACTAAGCAAAATCTTTCCACTATTAAAAACATATCCAGATTTAGTTTTGGATATATCGTCTATATTTCCA…
Rattus norvegicus ribovirus 2	2368	FALSE	FALSE	TRUE	2312	29.1	812	AQS16635.1	Camula virus	unclassified	Unclassified Riboviria	Unclassified Riboviria	Unclassified Riboviria	RNA	PP211297	GTTAAATTATACAGCAAATGGTGATTGTTACACTTCAGTTATCAGGTATTTACTGAGGTCAACAAAGAACTGTGGTGATTATCAATCAGTAATGAAGATAAGAAGCAGGGTCAGACATCTACTCCATAGTTATTTAGAATGGTCTGTCGAGTCAGACAATGGGTGGCAGCATATGGATGATGTCTCTATACCTGGCACAAACTACACACCTGACAGGGTAACCTATAATGAAGATGGCTCCATTAAATATATTTATGATTTTTGCGTAACTCAGAATGCAGCCTTGGCTTATCAAAGGAAATTGGCTAAGTATGGCAACTTGGCAGAGAATTTTTACTTACTGCCTTACAACATCCGAGGTGAATCAGTTAGTTATTTTGATGCAGCAGGTGTTAAAGT…
Rattus norvegicus ribovirus 2	6717	TRUE	FALSE	TRUE	2312	29.6	1030	AQS16635.1	Camula virus	unclassified	Unclassified Riboviria	Unclassified Riboviria	Unclassified Riboviria	RNA	PP211428	GGGCATCAGCCTATAAGGGCTATATTCCTCCCAAAACAGTAATAACTGAGTCAGAGGAGAGAGAATATATCCAGAATAAGGAGAAAATTGATCAAGTTTTAGCAGTGCTCAAGGCTTTTAGAAGAGAGTGGGCCAAAGTTGCAGGAGTCAATAAAATGTCATATGATATAAAAATTATCAATGATAAGGTCAAGAATGTTATCAAGAATAAGGATTTAAAAAGAGAAAATGAGAGGATTGATGAATTGGTGAAGTCTGTAGAGCCTATGGGGGAGATGGCTGTTAAATATGCTATTGAATGCTTGAATAAGGAAAGGATGTTTAGGAAGAACAGAAGAATATCAAAAAAGAGAATCTTCAGAGATAACACGATATATCTCGATACAAAGGCTTATATGC…
Rattus norvegicus ribovirus 2	612	FALSE	FALSE	TRUE	2312	58.3	175	AQS16635.1	Camula virus	unclassified	Unclassified Riboviria	Unclassified Riboviria	Unclassified Riboviria	RNA	PP211298	CAACAGTATCCTGAGGATGAAGACCACTGGGAAAAAGTTCATACTCCTAATGGCCCCATATTCCAGCTAAATATGCCTGAGAGTTTCATGATGGGTATGTTCAATTATTTATCTTCCTATGTTCATGCTATTGTGCAGAAATATTTCATTAATTGTATTCTGCCGGCTATAGCAAAAGCATTCAACTGTGAGCTGCATATGGTCCTTTTTGCGCATAGCGATGACAGCGGGGGCTGGCTGGACATTGCTGGCTCTAGTGACGATAATAAAGTGCTAGACTTTGTCCTTATGCAATATGAAAAAATATTGAATTTGACTAACCACCACTTATCTCCTAAAAAATGTGTTGTGTCTAAGTACTATTTTGAGTTGATTTCAAATATTTTTATAGATACAGAC…
Rattus norvegicus ribovirus 2	3766	FALSE	FALSE	TRUE	2312	27.6	1199	AQS16635.1	Camula virus	unclassified	Unclassified Riboviria	Unclassified Riboviria	Unclassified Riboviria	RNA	PP211299	TGGGGATGTCAGATTACAATGACAACTGTGGGTTGAGAACAATTGAAGAGATGTTTAAAGAGTTTTGGGAGTATCTCATACAGGATTCTACTGAATTTGAGGACTGGTATGGTCTGAAATGCACATCAGAATCCTTTCCAGATACAGTATCTGGGGGGCAATCTAGAGATTATTATTCGTTTTATAGTGCTGCCCTAGATAAAATTAAAAGAACCAGAATATATAGGATTATCCTATGGATATCAAATCTCTGTAAATCTATATGGGCAATATCTATGTACAAGACTAAAAAGAGAGTGGTTGTATTTGATAAAATTGGAACAAAAAACAGTCTACTTTTCGTATGCTCAACCGGAAATGTTCAGAAATTCAAATCATCGAAAGCATTCAAAATCTTAA…
Rattus norvegicus ribovirus 2	8027	TRUE	TRUE	TRUE	2312	34.5	741	AQS16635.1	Camula virus	unclassified	Unclassified Riboviria	Unclassified Riboviria	Unclassified Riboviria	RNA	PP211429	TTCAGGAGTAAATCTTAGGAGCATGTGGTGCAAGATCGTTAATACTGACATCACAGAATATGCAAATTCTCATGACATTGACATTGTTTCTGAAAAATGCAAATGCAATGAAATATTAGAAGACTGTGAGGTTCATGATATGTTGAAATGTGCATACAATGTGGAGAACAATATACTAAATTTTTTATCTGTTCACAATTGGGACAATGAAATGAGTTATAAGTTCTTGAAAATAAGGCACAACATATTTGCTGAGGCCTTCTTAAGTGACAATTCTATAGGGTCATGTGAGACAGATTGTAACCTAAGAAGAATGGGCTACGATTCTGACCTGACTCCTGATATTCATCTGAAGGAAAATGTTTTTATTGAATTCTTTGTCTCATCAAACTCAGATTT…
Rattus norvegicus ribovirus 2	2837	FALSE	FALSE	TRUE	2312	30.3	918	AQS16635.1	Camula virus	unclassified	Unclassified Riboviria	Unclassified Riboviria	Unclassified Riboviria	RNA	PP211300	CAGTGCAAAGAATTATTAAACGGATTGAATTATACAGCAAATGGTGATTGTTACCCTTCAACTATAAGGTATTTGCTGAGGTCAACTAAAAATTGTAGTGATTATCAGTCAATAATGAAGATAAGAAGTAGGGTTAGACATTTACTCCATAGTTATCTGGAATGGTCTGTTGAGTCAGACAATGGGTGGCAGCACATGGATGATGTTTCCATACCAGGCACAAACTACACACCTGACAGGGTGACTTACAATGAAGATGGTTCTATTAAATATATTTACGATTTTTGTGTAACTCAGAATGCAGCCCTGGCTTATCAAAGGAAGCTAGCTAAATATGGCAACCTGGCAGAGAATTTTTATTTATTGCCTTATAATATTCGGGGAGAATCAGTGAGCTAT…
Rattus norvegicus ribovirus 2	2005	FALSE	FALSE	TRUE	2312	33.2	663	AQS16635.1	Camula virus	unclassified	Unclassified Riboviria	Unclassified Riboviria	Unclassified Riboviria	RNA	PP211301	GCCTGAGAGTTTTATGATGGGTATGTTTAACTATTTATCTTCATATGTCCATGCTATTGTACAAAAATACTTTATAAACTGTATTTTACCAGCCATCGCAAGGGCATTTAACTGTGAGTTACATATGGTTCTTTTTGCCCATAGTGATGACAGCGGGGGTTGGCTGGACATTGCCGGCTCAGCTGATGACAGCAAAGTGCTGGATTTTGTTCTCATGCAATATGAAAAAATACTGAACTTGACCAACCATCACTTATCACCTAAGAAGTGTGTTGTGTCTAAATATTATTTTGAACTGATTTCCAATATCTTCATAGACACGGATGTGGTCCCAACAGTTGCTAAACAGATTTATGGCTTCACTGTGCCTTGCACTCAGTCAGGCCCAATAAATGATAT…
Rattus norvegicus ribovirus 2	1691	FALSE	FALSE	TRUE	2312	23.3	464	AQS16635.1	Camula virus	unclassified	Unclassified Riboviria	Unclassified Riboviria	Unclassified Riboviria	RNA	PP211302	GCCCGGGAATCTAGGTTATGCCTTAAAAATGAGGAAATTGTTGAAAAATTGTTATTATTCATCAATCTGGGGTGAAAAATTTACTACAACTTTCAACACATGCAAGATTCAATTGAAATCACACCATTATTTCCAATTGTCAGGGATAGGCACAGTTGCTTATGACAGATTGCCTGTACTGTTATCAGGATATAGCAATGTTCCTGTCCCTGAAATTGCAAGTTACAATAACCTATTTTCTTTACATGTGCAGCCATTAGCACAAAGGAATACTGCCCAGCTAAAGCCTGTCCATCTGAAAATTGATAGGATTAAAACAGAAGAATGGTACAATCTTATTGATATTAAAACTTGGTTGTTCCAGAATTCGTATGGAGTTGCTGCACTTTGTATAGAACC…
Rattus norvegicus rotavirus	1255	FALSE	FALSE	FALSE	1122	98.1	417	WFG79292.1	Rotavirus sp.	Rotavirus	Sedoreoviridae	Reovirales	Duplornaviricota	RNA	PP211303	GTACAATGGGGAAGTACAATCTAATCTTGTCAGAATATTTATCATTCATATATGATTCTCAATCCGCCGTACAAATTCCAATTTATTACTCTTCCAATCTGGAATTAGAGAAGAGATGCGTAGAATTTCATTCAAAATGTTTAGAAAATTCAAAGAAAGGACTATCTTTGACAAGTGTTTTTGCAGAGTATAAGGATGTCATAGAGAATGCAACCTTATTATCCATACTATCATACTCATATGACAAATATAACGCAGTAGAACGGAAACTGATGCGCTACGCAAAGGGAAAACCTTTAGAAGCTGATCCGAACGCAAACGAATTGGATTACGAAAACAATAAATTAACTAGTGAACTATTTCCAACAGCTGAAGAATATACTGATTCTTTGATGGATC…
Rattus norvegicus sapovirus 1	7265	TRUE	TRUE	TRUE	2278	58.1	2220	ATD51063.1	Sapovirus GII.8	sapovirus	Caliciviridae	Picornavirales	Pisuviricota	RNA	PP211430	GCTCCAAACGCCTCCAAACCAATGGCCCATCCCCTCCCCAGGGAGGGGCTCTGGTGCCTCCTTGCTCAGTGGCGCCGCCTCACTAGGCACTCGTCAACTGTGCACTCCTTCAGGGACCTCTTGTCCCTGTTGACCCTCGGCAGAGTACTCTTTGCCGAGGAGGGCCTGCTCGACCACCTTCGTGGCCGGGCCGACCTCCCTCCTCCAGTTCCACCGGAGGAGGTTTACCAAGATATCTTCGGCCCTATCCCCATTGGGCCCCTGTCACTCGATGACCTCGCTCGGTTGCAGGGCGAGATCATCGATGCCATCTCAACACCCGGCTCGAGGCTGCGTCAAAAATACTCACAACAGCAGCTTCGGGCCTCAGCCCAGCTCCTCTCCAAACATCTCCCCTGC…
Rattus norvegicus sapovirus 2	7217	TRUE	TRUE	TRUE	2220	49.9	2140	AWB14581.1	Murine sapovirus	sapovirus	Caliciviridae	Picornavirales	Pisuviricota	RNA	PP211431	TGCCGACATCTTTCTTGCCTTCGGGCAAGTGTTCTGGACGCTATCATGCGTTCGGAGTTCTCGCAGGCCCCATTAGGCCGATGCGAGTTATCTGGCAACCCGTTAATAGGGTTGCCAACTTATCAGTTGCAGAGTGCGACTGATGAGTGGGGTGGTGCGCGGGCGCGCCAAGCCCCACGTGGTCCAAACCCACAGCAAACCTCAGGTGGCGGGCTGGCTCACCGCGCAGTGGGTGCCGTGAGGGGCGCGGCAGACCGATTCTTTGACTGGCTGCCGAGTTTTGTCACTGGGCGGCCCGAGCTGCTGCCACCTGACCCAGTGGACGCAGTGCGCGTTCTCTTTGGTGAGGAGTTCTCCCCCTTCGGTCCTGTGTCCATGGATACACTATGTGCTGCCCGA…
Rodent Cardiovirus	8101	TRUE	TRUE	FALSE	2304	92.7	2305	AUO15553.1	Rodent Cardiovirus	Cardiovirus	Picornaviridae	Hepelivirales	Pisuviricota	RNA	PP211432	GATCTCCCCCGCGGTAGCTGGCTACAGTTGCCGCGGTGGAGACCATCCCCGGTCCTCCCTCTTTCAACGCGGGTACTGCGATAGTGCCACCCCAGTCTTACTCAACTCCCGACTCCCCGACCCTAACCCAGGTTCCTCGGAAAGGGACACTAAACCTCAATCCCCTGGATGCTGACTAATCAGAGGAAAGTTGGCATTTTCCGGCCCAGGCTTAGAGAAGTAGATAAGTTAGACTCAAATTGATTCAATTCCCCTTGACGAATTCGCGTCGAGGCACCACCTCTCACTTGCCGTCCTTCACACCCATCAATTTATTCGGCCTCTGTGTTGGACCCCTTGTTGAAGTGGTTCTCCTCGTCGCGACGTGGTTGGAGAATTTTGTCACCCGACTCCGACGAA…
Rodent Cardiovirus	8151	TRUE	TRUE	FALSE	2304	95.7	2305	AUO15553.1	Rodent Cardiovirus	Cardiovirus	Picornaviridae	Picornavirales	Pisuviricota	RNA	PP211433	CCCCGGGGATCTCCCCCGCGGCAACTGGTTACAGTTGCCGCGGTGGAGATCATCCCCGGTCCCCCCTCTTTCAACGCGGGTACTGCGATAGTGCCGCCCCAGTCTTCTCCTCCTCCCGACTTCCCGACCCTAACCCAGGTTCCTCGAAAAGGAACACCAAAACTCAATCCCCTGGATGCTGACTAATCAGAGGAAAGTTGGCATTTTCCGGCCCAGGCTTAGAGAAGTAGATAAGTTAGATTCAACCTGATTTAATTCCCCTTGACGAATTCACGTCGAGACGTCACCTCTCACTTGCCGTCCCTCACACCCATCATTCTAATTCGGCCTCTGTGTTGGACCCCTTGTTGAAGTGACCCCTCTCTTCGTGACGTGGTTGGAGAATTTTGTCACCCGACT…
Rodent hepacivirus	9391	TRUE	TRUE	FALSE	2865	92.2	2872	UZS78522.1	Rodent hepacivirus	Hepacivirus	Flaviviridae	Amarillovirales	Kitrinoviricota	RNA	PP211434	CATGGCGACCTTATCAGGGAAGTCTGTTTGTCTTCCTAAGACCGCTTGGCCTCCGACTTAGTGATACCAGCTGCGCCCATGTCCGGGAGCCGCGTCCAGCACACACTCCTCTTTCTCTAAGTGCTGGAACTCGCTGGTGGAAACCTTGGGACAAACCCGTGAGGCACTGGTGTGGGACTCTAGTAGACTCCGTGACCAGGTTGGCTTAGGTGGAACCAAGGTGGAATCCTACGAGTGGTACTCGTTGGACCAAAGATGCTCAGTGAGGGCAAGGCGAAGCTTGCCGGGGGGGAACTCCCGGGTGTACATCGGGCACAATAACCAGTGGAGATAAGCTGCGGTGGACGACGCTATATGCCTCCATGCCACGTCGGTAGTGCTTGCCTGGTGAAGGTGACA…
Rodent Paramyxovirus LR11-23	433	FALSE	FALSE	FALSE	176	89.2	139	BAO04325.1	Rodent Paramyxovirus LR11-23	unclassified	Paramyxoviridae	Mononegavirales	Negarnaviricota	RNA	PP211304	GTCCAGGGTGATAATGAGGCAATTGCTATCACTAAGAGAGTACCTAGTACGTATCCGTATTGGTTAAAGAAACATGAGTGTGCAGTTACTGCTAAGGTCTACTTCCATCAGCTGAGAAATAATTTAGGATTAATAGGTCACAATCTTAAAGCTAATGAAACAATAATATCTAGTCACTTCTTTGTTTATTCAAAGCAGATCTATTATGATGGGGTTGCTCTGTCCCAAGCATTGAAATCGATATCTCGATGTGTCTTCTGGTCTGAAACTATAGTGGATGAAACAAGGTCAGCATGTAGTAACATTGCAACTACTGTTACAAAAGCTGTGGAAAGAGGATACTCTAGAAATATAGGTTATGCACTCTGTATTCTTAAGACATTCCAACAATTAATGATA…
Rosavirus B	12597	TRUE	TRUE	FALSE	2490	97.6	2261	QNJ99369.1	Rosavirus B	Rosavirus	Picornaviridae	Hepelivirales	Pisuviricota	RNA	PP211435	GACCCTCTTCCCCCACCAGTTTATAAATTTGAAGACAAACAATCAGGCCACCCTAGTGCTACCCTATGTTGGTATGGCACCGGTGATGGCACACCATCACCGATATATGTATAGAGTGTTTGTGTATGAATGGTCCCAGTTCTATAGAACCTCCTATACCTCCACCCCCCCCATCACCGTAACCGTTCAAGCAGCTGACACCAATGCAGAGTTCTATGGGCTAAACACACATAGGCAATTGGTCACCCTTTTCCAAAATGACACCCGCCTCTCCCAGAATCAAAATGCAATTGTTTCAACCCACCCTCTTACAGATTGTGTTGTCCTGGCCCAAGGAGCGCAGGCGCTCATGGATACTTCCTACCTCCCTGGTAGGGTCACCTCTTTCTCTCAGCCCCT…
Rosavirus B	4872	FALSE	FALSE	FALSE	2491	98.6	1414	AOQ26201.1	Rosavirus B	Rosavirus	Picornaviridae	Picornavirales	Pisuviricota	RNA	PP211305	AGTGTGAAAATTCAGGAAAGAAAGTCCTTGCCTCCCTTGCCCTTGTTGGTGCACTCAGCTGCGCTGCAGCTGTTGCTGTGTCTTTCGAGGCACCTCCTCGGGAAAAAACGCGATCACCGAGAGTGTACCACAAAATGCAGAGATGCCCTGCCCTGGCTGAACAACCCCGTACCACCGAGGACGTTGTGGACGGAAAGCTCGCTGTCCGTCTCGCAGCCTTCGGTGTGGAAGGGGAAGTCAAGTCAGAGTGGGAGCCGCGTAATTGGATTCCCCGACGTCGCCGGACGATGTCGGGGGAGTCATGCTCATGGCTCCCTGTGCGGGAAGAAGGAGGGCCCCTCAAATCCCTTGAGCAGGCAGGAGATCAGCTTGCTTCCACCCTAAAAAAATTGGATTCTG…
Rosavirus B	7884	TRUE	TRUE	FALSE	2490	97.7	2438	QNJ99369.1	Rosavirus B	Rosavirus	Picornaviridae	Picornavirales	Pisuviricota	RNA	PP211436	TCACTGATGGCTTGCTTAATTCTTCTGCTTTTGAAATCGGTCAGAGTACAGCTACTTCTGATCGCCTCCTTGAAGTTTCTGTTGGTTCTACTGCTATGTCTTCTCAGGATGCTGTTACTGTTAGGGATGGGTGGCCAGGTGATGGCCAAATACCTCGCCCCGTTCCTCCTCCCATAGACAAACCCACGCCTCTGGGCCCAGCCGGAGAGCGTCTGCGGACGCTGAAGGTTGTTGACTGGAGTGCGAGGAAGGGATTCTCTGACCCACTCATTGATTGTGTCCTCCCCACTGAGCTTACTAATGATTCCTCAACAGATCCCTCCAACCTCTTCCATCCTGCAGCCGACCGCCATGCCTTGATGCGGTCTGATCTCCTGGTTGTTGTTACTGTTAATGCAA…
Rosavirus B	1261	FALSE	FALSE	FALSE	2491	98.1	420	YP_009290629.1	Rosavirus B	Rosavirus	Picornaviridae	Picornavirales	Pisuviricota	RNA	PP211306	GAGGACCTGAAGATGAGGAGAGTGGAGCGCAATGGTCACAAGACCGACGTCATGATATTCTCCTTGCCTGATGGACCCTGTGTGAAGAACATACTGAAATTCCTCAGAAAGTCTCCCGACTTGGCCGCTTCCAGATCCCCAGCGGTCATTAGCGTCAGGAGTAAATACAATCTGGAGGTGCTGGCGACTGGAATACAGGACTTTGGGAGCCTTGACATGTCTGGTGAGCAGTTATTTGGGATTCTTCGGTACCGCGCTGTCACGGCGCCAGGGTATTGTGGAGCCCCTCTCATCTCCTATGATCCAGCTCATGAACAGGTTCTTGGGATCCATATGGCAAGTAATGGTGCAGGCATTGCCTATGGTAGTTCCATATTTCAGTCAGACTTTGCAGAAGCA…
Rosavirus B	8797	TRUE	TRUE	FALSE	2491	91.3	2499	YP_009290629.1	Rosavirus B	Rosavirus	Picornaviridae	Picornavirales	Pisuviricota	RNA	PP211437	GGGTGGGGGTTAACCACCCCCATCCCTCTCCTGCCCCACCTGCTCAAGGTGTGGCGGGGCCGGCTTCCGGTTCTGCGCGCGAATCGGCGGCTGCTTACCCACCCGCGGCTTTGGACATGGTAAGACATGTAAAAATCTGTTCCATCTCCCCTTTCCCTTGTAACTTAAGTTTTTCCCTCCCCACAGGCTGCTAAGGCGCTTGCTGCTACGGCATGTGGACCCAGGAGTGCTTTAAACAATCTCCTCCAGTCTCTCTAGTGTCTATGCTTCAGAGAGCGGTGAACTGACACCGTTGCTTCTTGCACAGCCCTTCGTGCCGGTCTTTCCGGTTCTCGACAGCGTTGGGCATCATGGCTAGTTAGGCTAAGATAGCAGATGATTTAGTGAAAAGTTTTGGAT…
Rosavirus B	5219	FALSE	FALSE	FALSE	2491	98.4	1424	YP_009290629.1	Rosavirus B	Rosavirus	Picornaviridae	Picornavirales	Pisuviricota	RNA	PP211307	ACAGATTTTGTTGAAAATTTGACTGGTGTTAAGTGTGAAAATTCAGGAAAGAAAGTCCTTGCCTCCCTTGCCCTTGTTGGTGCACTCAGCTGCGCTGCAGCTGTTGCTGTGTCTTTCGAGGCACCTCCTCGGGAAAAAACGCGTTCACCGAGAGTGTATCACAAGATGCAGAGGTGTCCTGCCCTGGCTGAGCAACCCCGTATCACTGAAGACACTGTAGATGGAAAGCTTGCTGTCCGTCTTGCAGCCTTTGGTGTGGAAGGGGAAGTCAAGTCAGAGTGGGAGCCGCGTAACTGGATTCCTCGACGTCGCCGGGCGATGTTGGGGGAGACATGCTCGTGGCTCCCTGTGCGGGAAGAAGGAGGACCCCTCAAGTCCCTTGAGCAAGCTGGAGATCAG…
Rotavirus A	1422	FALSE	FALSE	FALSE	788	96.7	429	WCN84953.1	Rotavirus A	Rotavirus	Sedoreoviridae	Reovirales	Duplornaviricota	RNA	PP211308	AAGACGTTTCAAACGACGTTAGAGATATCTACGCGCGAATGAACGCTAAAGTCAAAGCCCTAGTCTCAACAGTCGGAATAGAAATCGCTAAACGATACATTGCTGGTGGGAAAATATTCTTTAGAGCTGGTATAAATTTATTGAACAACGAAAAAAGAGGGCAGAGTACACAGTGGGATCAAGCAGCAGTTTTATACTCAAATTATATTGTTAATAGATTGAGAGGATTTGAAACTGATAGAGAATTCATATTAACAAAGATCATGCAAATGACATCAGTAGCTATTACAGGATCGCTTAGATTGTTTCCATCAGAGAGAGTCCTGACAACTAATTCTACATTCAAAGTTTTCGATTCTGAGGATTTTATAATTGAATATGGTACGACAGATGATGAGG…
Sapovirus rat/S4-82	2811	FALSE	FALSE	FALSE	2044	95.5	799	AYW35044.1	Sapovirus rat/S4-82	sapovirus	Caliciviridae	Picornavirales	Pisuviricota	RNA	PP211309	GATGGCCTTTGAAGTCATAGCCTCTTTTTGTGAAGATAGCCCCTTCTCCACCGCTGTCTTTAGGACTTTAACAGAGAGGCCCTCAGGCTTGGTCCTGGATGTCATTGCCCACACCTCCCGCGGGCTCCCCTCCGGGATGCCCGCGACGTCGGTGGTCAACTCAATCTGCCACCTAATACTCTTTTCCATGGGCGTGCTTGGCATCTATTCAGATGTGGGAGCACCTTATATTGGCAATGTGTTCCAAACTGAGGTCGCTGTCGTCTATGGGGATGACTGTGTCTATGGCTTCTGCACCTCCACAGCCTCTGCAGCGGATAAATTCTGGGCCAAGTTGAGGAGTTTTGGCCTACAACCAACCAGTGCCGATAAGAAGTCCGACCCAGTGTGCACCACCAC…
Sara tick phlebovirus	6667	TRUE	TRUE	FALSE	2210	99.8	2209	WAK75789.1	Sara tick phlebovirus	Phlebovirus	Phenuiviridae	Bunyavirales	Negarnaviricota	RNA	PP211438	GTCCTTGAGTCGGCTAGACCAATTGTCTCAATACCTGGTGGAGCAGGTAAGGGACAGAGAGCCTGGCTTGATTGTCCCAGATCACGTCTTCACAGATCTGGGTACATGGCTGAAACCACCTAGTGTGCTAGTGGAACAGACTCAGAGTGGTGTCCTGAGTGTGAAGTTTCCAGGGCTGGAGCAATGGAAAAGCGCATCTGAGGTCTCCATGTCCTCAATAATAGAGGAGACATGGCCACAGGAAAGGGCCTCACACCTGCGACATGATTACACTGCTGGTTTCTTTTGCAGATCTCTCGATACTCCATTGCGAAGTGTCTTCCAGATGTGCAGAGACGACAATGATAATCTGACTCCTGACAACATCATGACCGTTGGGAATGTCATCCTGGTGCATGA…
Shrew hepatitis B virus	1699	FALSE	FALSE	FALSE	834	93.7	412	QAS68933.1	Shrew hepatitis B virus	Orthohepadnavirus	Hepadnaviridae	Blubervirales	Artverviricota	RNA	PP211310	TCTGTTCCAACCCTACTTTTCAAGCCCCCAAGCTGTGCCTTGAGTGGCTTTAGGGTATGGACAAACTTGACATCTATAAAGAATTTGGAGCAACTGATGCCTTGGTTTCTTTTTTGCCTGATGATTTCTTTCCTACTTTAAACCAACTGCTGGAGGTGGCTGATTCCCTGTTTGGGGAGCAGCTTACTGATAACCTGCATCATTCCCCTCACCATACTGCTTTGAGACATTTGCTAATGTGTGCTCAAGAAATTAACAAATTGCTTCAATGGTTAAGAGATACTGGTGGGCAGCAGGCTTATGCAACTGTGGTAGCACAGGTGGATAATACTGCAGCTTTACATCTGAGAAAAGCAATTTGGTTTCACACATCTTGTCTCACTTTTGGTCAAGGGGTTG…
Sichuan mosquito circovirus 3	652	FALSE	FALSE	FALSE	286	94.5	217	UBJ25974.1	Sichuan mosquito circovirus 3	Circovirus	Circoviridae	Cirlivirales	Cressdnaviricota	DNA	PP211326	GGAACGAGGAGCAGGAGGATTTCACCACTGGCAGATATGTGTCGCATTCAAGCGAGCTGTTCGACTCGCCGCTGTTAAGACTGAATTCGGAAGAACTTGCCATGCTGAACCAACAAGGAGCAGTGCTGCAGGCGAATATGTCTGGAAGGAGGACACTAGAATACCCGACACCCAGTTCGAACTCGGTCATATGGCTTTCAAGCGAAATTCAAAGCCCGATTGGGACAAGGTCTGGGATGATGCAAAGCGTGGGAAGTTCGACGAGATACCAGCAAACGTTAGAGTCAACTCCTACAACGCTTTATGCAGAATCGCCAAAGATCACATGGTCGCCGAGCCGATGGAAAGAATGGTCTACGTTTTCTGGGGAAAAACAGGAACTGGAAAGTCCCGTCGTGC…
Sichuan mosquito circovirus 3	984	FALSE	FALSE	FALSE	286	94.4	286	UBJ25974.1	Sichuan mosquito circovirus 3	Circovirus	Circoviridae	Cirlivirales	Cressdnaviricota	DNA	PP211327	GCGTTTTGTTGTTACGCCTCTTTTACCCGAAATGGCGTACAGGGCCGATCGATGGCGACGTGTCAGAAAAGTATAAAAGGAGAGCGAAATGAGCACTATTTTTTATGACTCAAGCAAGATATTGGATACTTACCATACCTAAAGATGACTACCAACAACATACTGAATTACCCAACACCATTCAGCACATTAAGGGACAACAGGAACGAGGAGCAGGAGGATTTCACCACTGGCAGATATGTGTCGCCTTCAAGCGAGCTGTTCGACTCGCCGCTGTTAAGACTGAATTCGGAAGAACTTGCCATGCTGAACCAACAAGGAGCAGTGCTGCAGGCGAATATGTCTGGAAGGAGGACACTAGAATACCCGACACCCAGTTCGAACTCGGTCATATGGCTT…
Sichuan mosquito circovirus 3	1453	FALSE	FALSE	FALSE	286	94.1	286	UBJ25974.1	Sichuan mosquito circovirus 3	Circovirus	Circoviridae	Cirlivirales	Cressdnaviricota	DNA	PP211328	ATCGTTGTTAAGTAATTTATACCACCAACGTCGGCGATATTGTGGAGCCATAAAGAAGAAAGAATAAACATTAGTGATGACGTCATTTTGGGACGTCAAGTGGGACGTGGGACGCCGTTCTGTAAGTAATACTAGGCGTCCCGGTCCAAAATCCCGAAAAGTTATTAGCCGCCCAAGCTTCGAGTTAGGCAAGCCTAACACGAAACTTGTTCTCCTAGCGCTGTAGGCACACTATAGATAATGATGTCTCACACTCCGTGGGCCCTGCGGGTCTAACATGCTCGCCCCAGACTGTCCAAGTCTGGTCCTCGAGTACTAGATGGGTACTAATGTTAAATTGTAATGGGTAGGGTTAGTCTGTAGCCACACAGACATAACCCTATATACGGGTACTAATCC…
Sichuan mosquito circovirus 3	1211	FALSE	FALSE	FALSE	286	94.4	286	UBJ25974.1	Sichuan mosquito circovirus 3	Circovirus	Circoviridae	Cirlivirales	Cressdnaviricota	DNA	PP211329	GTCTCACACTCCGTGGGCCCTGCGGGTCTAACATGCTCGCCCCAGACTGTCCAAGTCTGGTCCTCGAGTACTAGATGGGTACTAATGTTAAATTGTAATGGGTAGGGTTAGTCTGTAGCCACACAGACATAACCCTATATACGGGTACTAATCCTAATCAGTGACGCGTGATTATACTAACCTAATCAGTGACGCGTGATTATACTTTTACGCGTTTTGTTGTTACGCCTCTTTTACCCGAAATGGCGTACAGGGCCGATCGATGGCGACGTGTCAGAAAAGTATAAAAGGAGAGCGAAATGAGCACTATTTTTTATGACTCAAGCAAGATATTGGATACTTACCATACCTAAAGATGACTACCAACAACATACTGAATTACCCAACACCATTCAGCAC…
Sichuan mosquito circovirus 3	3379	FALSE	FALSE	FALSE	286	94.8	286	UBJ25974.1	Sichuan mosquito circovirus 3	Circovirus	Circoviridae	Cirlivirales	Cressdnaviricota	DNA	PP211330	GCACCAGTCTTTTGATACCAAGTTTTCATATTATTATACATAGAATTAACACGGCGGAAATCATCAGCAACACGAGTTAAATTAACTTGTCCGCCAGGGGCATATCGATTTTTTGCAGCAAATGTAATTGCACCAGCAATACCAGAACGTTTACCCATTTGTAGCGTTTAGAAAGAAAGAAACAAACTCACCCGAACCAGCTATTTATAGCCTCCCAGACCTGTTTGTTTGTTATGACGTCATGGGACGTGGAGTGGGACGTGGGACGCCGCTCTAGTAAGTAATACTGCGGCGTCCCGGTCCTGAGTCACTAAAAAATTATTAGCCGCCCAAGCTTCGAGTTAGGCAAGCCTAACACGAAACTTGTTCTCCTAGCGCTGTAGGCACACTATAGATAAT…
Theiler's encephalomyelitis virus	8098	TRUE	TRUE	FALSE	2305	84.2	2310	AWB14663.1	Theiler's encephalomyelitis virus	Cardiovirus	Picornaviridae	Picornavirales	Pisuviricota	RNA	PP211439	CCTGGGGATCTCCCCCGCGGTAGCTGGCTACAGCTGTCGCGGTGGAGACCATCCCCAGGTTACCCCCTCTCAACGCGGGTACTGCGATAGTGCCACCCCACGTCTTACCCTCTTCCCGACTTCCCGACCCTAACCCAGGTTCCTCGGTGAAGGAACACCAAAACTCATCCCCTGGATGCTGACTAATCGGAGGAACGTCAGCATTTTCCGGCCCAGGCCTAGAGAAGTAGATAAGTTAGACTCAAATTGATGATAATCCCCTTGACGAATTCGCGTCAGGACACCACCTCTCACTTGCCGCTCTTCACACCCACTAATTTGATTCGGCCCCTGTGTTGAGCCCCTTGTTGAAGTGGTTTATCCTTTCGCGACGTGGTTGGAGATTTTGTCACCCGACTC…
Tick-associated circular virus-6	637	FALSE	FALSE	FALSE	347	94.5	110	USZ80633.1	Tick-associated circular virus-6	unclassified	Circoviridae	Cirlivirales	Cressdnaviricota	DNA	PP211331	CTTTATATAGCTCCAGCTCTCTGTAATATTAAAGATAGAGAGCTTCCGCCATCCGCCACCATACGGAGTTTTTTATATCCGCCAGTAGGAGTTTGAATTTTTTCAAACTCAGTTTGTCCCATAACCAAATGTTTTTGTATCCGCTAACTTATGAGCAGGGTATTTGGGGGAATTTCATAATGAATACCGCTGAACAACAATCTGCTTACATTGCTAATGGATGGTCCGAATATGGAAGCTACGCTAACCCGATCACCCTGGATGACGAGTTCCCACAACCAACAAGTTGGAGAACCTTGTTCGACATGCCAGGCACATTACACCATGAGCCGAATGGTTTTGATAATGGTGTTTCTACTGAGCATGCTGATATTAATAATGCTAGTACTGATTTGGCGA…
Tick-associated genomovirus 1	901	FALSE	FALSE	FALSE	303	88.7	300	USZ80635.1	Tick-associated genomovirus 1	Gemycircularvirus	Genomoviridae	Geplafuvirales	Cressdnaviricota	DNA	PP211332	CTTGGCTATTCTGGTTGCTACTCTTACTCCTTGGGGTCCACACATCCGTGTGTCTAGAGAACATCACGAAGACGGAGGATTCCACCTGCACGCTTTCATCAGACTCGATCGAAAACCCAACTTCCGGTTGGCTAGTGTATTTGACATTGACGGCTATCATCCCAATATTGACAGTCGTATACGTGATCCTAAGGCGACTTTTGATTACGTTTCGAAGGACGGAGACTACTGTGACCACGGCGCTCCAGGAACTTTAACTACGAAATGGGCAAGCGTTCTCTCGGCATCTACGGTAGAGGACTTTTGGACTACGGTGTGCGAAGTCTCACCAAAAGATTACGTTATAAATCACGAACGGTTAGAGTATTACGCATTAAAAAAGTTTGCGGATGTTGGTAC…
Tick-associated genomovirus 1	2405	FALSE	FALSE	FALSE	303	90.4	335	USZ80635.1	Tick-associated genomovirus 1	Gemycircularvirus	Genomoviridae	Geplafuvirales	Cressdnaviricota	DNA	PP211333	CTACGATCCGACTTCCATGTGTTCCTAATCCGAAATCTCCGAATGTAGGTGCTGCGTAGGTTCCCGATGTAATGGTTGCATTATTTGCCTGAACGATCCCTAAGTTCTGTCGTTTGATGGTATGAATGGTTGATGATTCACCAAGAATGCCCATTGCATTTTTATTAAATGCGGTTGCATTGTAAGCTCCGCCTCCAATTCCATTATGTTGCTGTTTTGAATTGGTTACAAGGTAGAATGTAACTTCTGCTGCTGACGTTTGCGAATTGTAAATTTGTACTTCATATTTGATTGACTTTATAAACATTTTGCCTCCTCTCATTGGTCCGGTGACTGACGGCCATGGGTTAACGTTCACTGTGGTTCCACTCTGTGGTACACCACCTTGAGAAGGGTTCA…
Tick-associated genomovirus 1	2589	FALSE	FALSE	FALSE	303	90.4	335	USZ80635.1	Tick-associated genomovirus 1	Gemycircularvirus	Genomoviridae	Geplafuvirales	Cressdnaviricota	DNA	PP211334	ATGTGTTCCTAATCCGAAATCTCCGAATGTAGGTGCTGCGTAGGTTCCCGATGTAATGGTTGCATTATTTGCCTGAACGATCCCTAAGTTCTGTCGTTTGATGGTATGAATGGTTGATGATTCACCAAGAATGCCCATTGCATTTTTATTAAATGCGGTTGCATTGTAAGCTCCGCCTCCAATTCCATTATGTTGCTGTTTTGAATTGGTTACAAGGTAGAATGTAACTTCTGCTGCTGACGTTTGCGAATTGTAAATTTGTACTTCATATTTGATTGACTTTATAAACATTTTGCCTCCTCTCATTGGTCCGGTGACTGACGGCCATGGGTTAACGTTCACTGTGGTTCCACTCTGTGGTACACCACCTTGAGAAGGGTTCATATTAAATAGTGACAT…
Wufeng Apodemus chevrieri jeilongvirus 1	19622	TRUE	TRUE	FALSE	2188	97.9	2188	UOL48925.1	Wufeng Apodemus chevrieri jeilongvirus 1	jeilongvirus	Paramyxoviridae	Mononegavirales	Negarnaviricota	RNA	PP211440	GTATAACAATAATGTTAAAATTGAAGTAGAAAGTCTTAGGAGCAAAGACTCTCCTTTTTGGATTTGGGATTGGACATACCAAGATGTCTAAACTTGGATCTGTTCTGGAAGAGTTTCGCTCTCACAAGAATGCTCCTCCTAAAAGAGGAACATTGACGACAGCACTCCAAGGGCTAAAGAAGAATGTGGTTATCCCTGTCCCGATGATGAAAGATCCAACCAGGAGATTTCAATTTATAACTTTTTGTCTCCAGGTTGTCTGGTCTGCACGATCCTCCGGTGCTTTTATAACAGGTGCTATGATGAGTTTGCTGTCAGTGTTCGCTGAAAACCCAGGGGCAATGCTTAGGTCACTGCTGAATGACCCAGATATTGATGTGCAAATTGCTGAAGTGTCAG…
Wufeng Niviventer fulvescens morbillivirus 1	5918	FALSE	FALSE	FALSE	542	91.3	542	UBB42349.1	Wufeng Niviventer fulvescens morbillivirus 1	morbillivirus	Paramyxoviridae	Mononegavirales	Negarnaviricota	RNA	PP211311	CCCTGAATCAATCCCCGAGGAGTCAGATAATGATGGCATCTTGGATGGAGATATCAGTCCTAGCAGACATGCTCCAGTTCCAAATCAAGGAGAGCCTGGAGATAACAAAGCAAGAGAAAATACTAGAGCAACCCCAATACGATACCCTTCAATTCCTACTGACGATTCTGAACAGGCTGATATTGAAGATGCCGCTAACAGCACAGTGGGCAGCGCTAGTGATGCAGGAGGTGTGTCAGAATCAGGAGGAACAGCACCACTTTCAGCAAGCACTCCGGTTACTTCAGACGATGATGCCTCAGGATCTCTGGCAAGTGGCAACTCATCATCAAGAAGGGGTTCTTCAGTTACAAGACAATCTATTGAGCCAATAAAAGAAGAAGACTTCGCTGCGGTTGG…
Wufeng Niviventer fulvescens morbillivirus 1	3546	FALSE	FALSE	FALSE	2196	95	1159	UBB42352.1	Wufeng Niviventer fulvescens morbillivirus 1	morbillivirus	Paramyxoviridae	Mononegavirales	Negarnaviricota	RNA	PP211312	AGCCCTAATCCAATGCTCAAAGATTTATTCCATGAACAATCTAATGAGGAAGATCAAGAAATGGCAATGTTCTTATTAGATAGAGAAATTATAATTCCTCGTGCTGCTCATGAGATTTTGGACAACACAGTAACTGGTGCTCGAGAGAGTATCGCAGGACTTCTGGATACAACAAAAGGTTTAATTCGAAGTGGATTACATAGAGGAGGATTAAGGCCTACCCTAATAAGGAAAATTTCTACTCATGACTATGAGCAATACAAGAATGCAATTGCAATGTTGCATAACAATCAATTTAATCCATTGATATCAATTGAAGCATGTTCTGTTTCTCTCGCTCAAGCAATCCGAAAACATATGTGGGCAAAGCTAACAAGAGGACGTCCAATTTATGGTCTT…
Wufeng Niviventer fulvescens orthohantavirus 1	350	FALSE	FALSE	FALSE	2151	100	46	UBB42265.1	Wufeng Niviventer fulvescens orthohantavirus 1	Orthohantavirus	Hantaviridae	Bunyavirales	Negarnaviricota	RNA	PP211313	TGTTGATCAGATGATAAAGCACGATTGGTCAGACAATAAGGATTCAGAGGAGCCGATAGGGAAAGTTTTATTGTTTGCAGGAGTGCCAAATAATGTTATTACAGCCATGGAGAAGAAAGTTATCCCCAATCACCCAACAGAAGTCGGAGGCCAAGCGGTCTTAGGAAGACAATGTCTGCGAACTGATAAGGTCGCCATGCCTCTCAGTACGTCAGCAGTTGTAGTCATCGCAACTCCTTGGCTCACAGAACGACATGGCTACGATCCGACTTCCCAATAGTAAACTCCTTCAGTTTGTTGTGAATTTCTCTATATTTCTCCATTTTTCTAGTTAATTGTCACTTCCGGAG
Wufeng Niviventer fulvescens orthohantavirus 1	281	FALSE	FALSE	FALSE	2151	97.8	93	UBB42265.1	Wufeng Niviventer fulvescens orthohantavirus 1	Orthohantavirus	Hantaviridae	Bunyavirales	Negarnaviricota	RNA	PP211314	AGTTATATGAAGAGACAAGAGAGCATAAGGCAATGGCTAGGATTGTTAGAAAGTACCAGCGTACTGAGGCTGATCGTGGTTTTTTTATTACAACATTACCTACTAGATGCAGATTAGAAATAATTGAAGACTATTATGATACAATAGCAAAAAACATTGCTGAGGAATATATATCCTATGGAGGAGAGAAGAAAATCTTAGCCATTCAATCTGCTTTGGAGAAAGCATTAAGGTGGGCATCTGGCGAAAGTTTTATAGAATTGAGTAATCAGAAGTTCATA
Wufeng Niviventer fulvescens pegivirus 1	6046	FALSE	FALSE	FALSE	3365	96.4	1975	QUS47378.1	Wufeng Niviventer fulvescens pegivirus 1	Pegivirus	Flaviviridae	Amarillovirales	Kitrinoviricota	RNA	PP211315	GTGAAAACCGCGTGCAGCTCGATTGCCCTACCCCCATTTCTAAACTTAAGGGTGCTTCCGGGACTCCGGTCCTGTGTGACTGTGGTCATGCCGTGGGCATGATGGTTGGTGCTAGTGGCCGCTCCGGCACCGGGGAGTCTGTGCGTTTCGTGGTTCCATGGAAGGTACAACCCGGTGATGTTAAGCCCGCGGCCTTGCCAGAGTACCCCACGGTACCAGCCACAGGGTACAAAGAAGTTCCGTACATTGCGCCGACAGGCAGTGGGAAGTCCACCAAGTTCCCGGCCAAGCTGGCGCAGGACGGCCACAATGTATTGGTACTTAACCCGTCCGTGGTCACCACAAAGGCCATGCACGGGTACATGAAAGAGCTGACTGGCAAGGCGCCGAACGTCTTCG…
Wufeng Niviventer fulvescens pegivirus 1	11278	TRUE	TRUE	FALSE	3365	95.3	3365	QUS47378.1	Wufeng Niviventer fulvescens pegivirus 1	Pegivirus	Flaviviridae	Amarillovirales	Kitrinoviricota	RNA	PP211441	CCGCTCCCGGGAGGTCACCATATTGATGCCGAACTTAGTGCGGACACCCGATCGGCATAGCGCACTACAGCCCAGAACTCCTGGACTCAAGCGATCCTCCTGCCTCAGCCTCCCGAGTAGCTGGGACTACAGGCGTGCGCCACCGCCCGCAAGCCACTGCGGAGGGCTGGGCCAGGTACGCCCTGAGGCGTAGACCCCGGCCGTAACGATGAGTACGGGGGACGCAATATGCTGTGCCCACGGCAGAAGGCGTTGCCCTAGAAAGTCGGTAGGACGTGGCCCATGCGCCGATGGGATGGGGTGTTGGTAGAGCAGTCGAGACCCAGTAAGGCCCGAGTACGGGCCTCCCAGCCGTGGTCAGCGTAATCCTCGCTGTGATACCACGTGTATGGAGGGCGT…
Wufeng Niviventer fulvescens pegivirus 1	15352	TRUE	TRUE	FALSE	3365	94.9	3365	QUS47378.1	Wufeng Niviventer fulvescens pegivirus 1	Pegivirus	Flaviviridae	Amarillovirales	Kitrinoviricota	RNA	PP211442	TGACAAAGTAGAAAGGGTAAACATAAATAAGGCTTTAATTTGGCAAAATATAATACAACGCCTTCTGTTAACTTCTAACGAACAATTTCCCAATTACTTCACTCCCACACCTGGATTACTTCTCCTTTGTGAGTTGCTGATTTACTTCCTGAAGCAATTGCTGTAACTGTGCCACAGTCTGAGTGAGACTTACAGACATCGTCTCTTTCTCAGGAGACCCCATTTCTGGGGAAATATCACTATTCTCAATAACAACCGTGTCTCCAGCAGCTTTTAGTGAAATTTTCGAGTGGATAAAGTTCAATGACTGTTGAGCCTTATGCAAATCATCGGCTACCTTCTTTCTCTCTGTTTGTTCATTTTGAAGTTTTGAGTGGGTTTCATTTAGCTGTGTCTTGA…
Wufeng Niviventer fulvescens pegivirus 1	11088	TRUE	TRUE	FALSE	3365	95.3	3365	QUS47378.1	Wufeng Niviventer fulvescens pegivirus 1	Pegivirus	Flaviviridae	Amarillovirales	Kitrinoviricota	RNA	PP211443	CTCCGTTTCCGACCTGGGCCGGTTCACCCCTCCTTAGGCAACCTGGTGGTCCCCCGCTCCCGGGAGGTCACCATATTGATGCCGAACAGCCACTGCGGAGGGCTGGGCCAGGTACGCCCTGAGGCGTAGACCCCGGCCGTAACGATGAGTACGGGGGACGCAATATGCTGTGCCCACGGCAGAAGGCGTTGCCCTAGAAAGTCGGTAGGACGTGGCCCATGCGCCGATGGGATGGGGTGTTGGTAGAGCAGTCGAGACCCAGTAAGGCCCGAGTACGGGCCTCCCAGCCGTGGTCAGCGTAATCCTCGCTGTGATACCACGTGTATGGAGGGCGTGTCCCAACTGACGTGTCTCCGTGGGGGGGGGTTCCCTCACGGGCGGGGTGGCTCCCGTGACTGT…
Wufeng Niviventer niviventer pegivirus 1	11206	TRUE	TRUE	FALSE	3365	95.51	3365	QUS47377.1	Wufeng Niviventer niviventer pegivirus 1	Pegivirus	Flaviviridae	Amarillovirales	Kitrinoviricota	RNA	PP211444	GTACAACTGATAAGGTCGCCATGCCTCTCAGTACGTCAGCAGTTGCTGAGCTGTCAACTCCTTGGCTCACAGAACGACATGGCTACGATCCGACTTCCCGGCCCTAACCGCAAGCCACTGCGGAGGGCTGGGCCAGGTACGCCCTGAGGCGTAGACCCCGGCCGTAACGATGAGTACGGGGGACGCAATATGCTGTGCCCACGGCAGAAGGCGTTGCCCTAGAAAGTCGGTAGGACGTGGCCCATGCGCCGATGGGATGGGGTGTTGGTAGAGCAGTCGAGACCCAGTAAGGCCCGAGTACGGGCCTCCCAGCCGTGGTCAGCGTAATCCTCGCTGTGATACCACGTGTATGGAGGGCGTGTCCCAACTGACGTGTCTCCGTGGGGGGGGGTTCCCTCA…
