# Supplementary material for: Virome characterization of field-collected rodents in suburban Beijing reveals a spectrum of emerging pathogens
Source: Research Square preprint supplement (doi:10.21203/rs.3.rs-3901407/v1), 2024-02-02
Supplement: Supplementary file 2 [file 9ca80dbc6d707e19b30cd442.xlsx]

## Sheet: Sheet1
Supplementary Table 5. Number of patrical-length viruses and full-length viruses detected in each rodent species.
Rodent	Number of viruses
	Total	Novel viruses			Known viruses
		Patrical-length	Full-length		Patrical-length	Full-length
Allocricetulus eversmanni	3	0	1		2	0
Cricetulus longicaudatus	12	3	0		7	2
Myodes rufocanus	4	1	2		1	0
Apodemus agrarius	7	5	0		0	2
Apodemus draco	14	7	2		5	0
Apodemus peninsulae	12	4	0		5	3
Niviventer confucianus	30	10	0		14	6
Rattus norvegicus	74	34	11		23	6
Mus musculus	1	0	0		1	0
