# Supplementary material for: Virome characterization of field-collected rodents in suburban Beijing reveals a spectrum of emerging pathogens
Source: Research Square preprint supplement (doi:10.21203/rs.3.rs-3901407/v1), 2024-02-02
Supplement: Supplementary file 3 [file d0602a0f52208ff1029d2336.xlsx]

## Sheet: Sheet1
Supplementary Table 6. Information of 9 viruses reported for the first time in China.
Viruses	Country	Continent	Vector/host	Year of idntification
Bastrovirus BAS-3	Viet Nam	Asia	Rat	2013
Mossman virus	Australia	Oceania	Wild rat	2003
Rodent Paramyxovirus LR11-23	Zambia	Africa	Rat	2011
Chicken picobirnavirus	Brazil, Hungary	South America, Europe	Chicken	2009
cardiovirus C1	USA	North America	Rat (Rattus norvegicus）	2010
Theiler's encephalomyelitis virus	USA, Iran, Viet Nam, Brazil	North America, Asia, South America	Rat	1934
Lasius neglectus virus 1	Spain, United Kingdom	Europe	Lasius neglectus (ant)	2014
Lasius niger virus 1	Italy, United Kingdom	Europe	Lasius niger (ant)	2014
Shidu rodent jeilongvirus	Korea	Asia	Rat (Apodemus agrarius）	2017
